# Supplementary material for: Rapid genome editing by CRISPR-Cas9-POLD3 fusion
Source: bioRxiv preprint, doi:10.1101/2021.05.23.445089, version 2 (2021-06-16)
Supplement: DNA_repair_domain_library [file 445089_file06.xlsx]

## Sheet: protein_fragments_from_genscrip
target construct name	insert sequence	AA start (relative to canonical transcript)	AA end (relative to canonical transcript)	base start (relative to canonical transcript)	base end (relative to canonical transcript)	lenght (bp)	Species	Alternative gene names	transcript (full lenght constructs)
ZFYVE26_2000_2540_pDONR221	ATGCTTTGTGACAGCTACATCAGCAAGGTAGATGTGCTGAATATTTTAGTTGCTGCTGCCTATCGCCACGTGCCATCTTTGGATCAGATCTTGCAGCCAGCTGCAGTAACCAGGCTAAGGAACCAGCTTTTGGAAGCCGAGTACTACCAACTGGGCGTTGAGGTCTCCACAAAGACTGGGCTTGATACCACCGGGGCGTGGCATGCTTGGGGCATGGCCTGCCTCAAAGCCGGGAACCTCACTGCTGCACGGGAGAAGTTCAGTCGCTGTCTGAAGCCCCCATTTGACCTCAATCAGCTGAATCATGGCTCAAGGCTGGTGCAGGATGTGGTTGAGTACCTAGAGTCCACAGTGAGGCCCTTTGTATCCTTGCAAGATGACGATTACTTTGCCACCCTG…	2000	2540	6001	7620	1620	Human
WRN_600_1100_pDONR221	ATGCTGATGGAAGACCAAGTGCTACAGCTTAAAATGTCCAACATCCCAGCTTGCTTCCTTGGATCAGCACAGTCAGAAAATGTTCTAACAGATATTAAATTAGGTAAATACCGGATTGTATACGTAACTCCAGAATACTGTTCAGGTAACATGGGCCTGCTCCAGCAACTTGAGGCTGATATTGGTATCACGCTCATTGCTGTGGATGAGGCTCACTGTATTTCTGAGTGGGGGCATGATTTTAGGGATTCATTCAGGAAGTTGGGCTCCCTAAAGACAGCACTGCCAATGGTTCCAATCGTTGCACTTACTGCTACTGCAAGTTCTTCAATCCGGGAAGACATTGTACGTTGCTTAAATCTGAGAAATCCTCAGATCACCTGTACTGGTTTTGATCGA…	600	1100	1801	3300	1500	Human
TP53BP1_900_1400_pDONR221	ATGTGTGAAAGTTCTAGTGAAACCCCATTTCATTTCACTTTGCCTAAAGAAGGTGATATCATCCCACCATTGACTGGTGCAACCCCACCTCTTATTGGGCACCTAAAATTGGAGCCCAAGAGACACAGTACTCCTATTGGTATTAGCAACTATCCAGAAAGCACCATAGCAACCAGTGATGTCATGTCTGAAAGCATGGTGGAGACCCATGATCCCATACTTGGGAGTGGAAAAGGGGATTCTGGGGCTGCCCCAGACGTGGATGATAAATTATGTCTAAGAATGAAACTGGTTAGTCCTGAGACTGAGGCGAGTGAAGAGTCTTTGCAGTTCAACCTGGAAAAGCCTGCAACTGGTGAAAGAAAAAATGGATCTACTGCTGTTGCTGAGTCTGTTGCC…	900	1400	2701	4200	1500	Human
SMG1_1200_1800_pDONR221	ATGGCTGCTGTGCAGGAATGGCAGAACGCTATCCATGACTTGAAAAAGAGTACCAGTAGCACTTCCCTCAACCTGAAAGCTGACTTCAACTATATAAAATCATTAAGCAGCTTTGAGTCTGGAAAATTTGTTGAATGTACCGAGCAGTTAGAATTGTTACCAGGAGAAAATATCAATCTACTTGCTGGAGGATCAAAAGAAAAAATAGACATGAAAAAACTGCTTCCTAACATGTTAAGTCCGGATCCGAGGGAACTTCAGAAATCCATTGAAGTTCAATTGTTAAGAAGTTCTGTTTGTTTGGCAACTGCTTTAAACCCGATAGAACAAGATCAGAAGTGGCAGTCTATAACTGAAAATGTGGTAAAGTACTTGAAGCAAACATCCCGCATCGCTATT…	1200	1800	3601	5400	1800	Human
SLX4_1400_1835_pDONR221	ATGGAGCAGGAGGTGGCCTCCCATCAGGCCAACAGAAGCCCCCCACTGGACAGTGACCCCCCAATTCCAATTGACGACTGCTGCTGGCACATGGAGCCCCTCTCGCCAATTCCCATTGACCACTGGAACCTGGAGCGGACCGGCCCCCTGAGCACCAGCAGCCCCAGCCGCAGGATGAACGAGGCCGCCGACAGCCGTGACTGTCGCTCCCCGGGACTCCTGGACACCACCCCCATCCGAGGAAGCTGCACTACCCAGAGGAAATTGCAAGAGAAGTCCTCGGGCGCGGGCTCCCTGGGGAATAGCAGGCCGAGCTTTCTGAATTCGGCTCTGTGGGACGTTTGGGACGGGGAAGAGCAGAGGCCTCCAGAGACCCCTCCTCCGGCCCAGATGCCAAGC…	1400	1835	4201	5505	1305	Human
RNF20_500976_pDONR221	ATGTTGAGAGAAGCCCAGTCTGACCTGAACAAGACACGCCTGCGTAGTGGTAGTGCCCTCCTGCAGTCCCAGTCTAGTACTGAGGACCCGAAGGATGAGCCTGCGGAGCTAAAACCAGATTCTGAGGACTTATCCTCCCAGTCCTCAGCTTCAAAGGCATCTCAGGAGGATGCCAATGAAATCAAGTCTAAACGGGATGAAGAAGAACGAGAACGAGAAAGGAGGGAGAAGGAGAGGGAACGAGAAAGAGAACGGGAGAAGGAGAAGGAGAGAGAACGAGAGAAGCAGAAGCTAAAAGAGTCAGAAAAAGAGAGAGATTCTGCTAAGGATAAAGAGAAAGGCAAACATGATGATGGACGGAAAAAGGAAGCAGAAATTATCAAACAATTGAAGATTGAA…	500	976	1501	2928	1428	Human
RAD50_1_500_pDONR221	ATGTCCCGGATCGAAAAGATGAGCATTCTGGGCGTGCGGAGTTTTGGAATAGAGGACAAAGATAAGCAAATTATCACTTTCTTCAGCCCCCTTACAATTTTGGTTGGACCCAATGGGGCGGGAAAGACGACCATCATTGAATGTCTAAAATATATTTGTACTGGAGATTTCCCTCCTGGAACCAAAGGAAATACATTTGTACACGATCCCAAGGTTGCTCAAGAAACAGATGTGAGAGCCCAGATTCGTCTGCAATTTCGTGATGTCAATGGAGAACTTATAGCTGTGCAAAGATCTATGGTGTGTACTCAGAAAAGCAAAAAGACAGAATTTAAAACTCTGGAAGGAGTCATTACTAGAACAAAGCATGGTGAAAAGGTCAGTCTGAGCTCTAAGTGT…	1	500	4	1500	1497	Human
POLD1_5801134_pDONR221	ATGTACACGGGAGCCACTGTCATCGAGCCCCTCAAAGGGGTGAGGCCACAAGACAGGGCGGGGGCGGCATGGGAACTCCTAGCCCTGACTCCCGGCCGCGGCTGCTCCCCTCCCAGGTACTACGACGTCCCCATCGCCACCCTGGACTTCTCCTCGCTGTACCCGTCCATCATGATGGCCCACAACCTGTGTTACACCACGCTCCTTCGGCCCGGGACTGCACAGAAACTGGGCCTGACTGAGGATCAGTTCATCAGGACCCCCACCGGGGACGAGTTTGTGAAGACCTCAGTGCGGAAGGGGCTGCTGCCCCAGATCCTGGAGAACCTGCTCAGTGCCCGGAAGAGGGCCAAGGCCGAGCTGGCCAAGGAGACAGACCCCCTCCGGCGCCAGGTCCTG…	580	1134	1741	3402	1662	Human
PAN3_1548_pDONR221	ATGAACAGTGGCGGCGGCCTCCCGCCCCCCTCGGCCGCCGCCTCCCCTTCCTCCTCCTCGCTGGCGGCGGCGGTGGCGGTGGTGGCCCCGCCGGGGGTCGGGGGTGTCCCCGGCGGGGCGGCGGTAGGAGTGAAGCTGAAGTACTGCCGCTACTACGCTAAGGATAAGACTTGCTTCTACGGGGAGGAGTGTCAGTTCCTGCATGAGGACCCTGCCGCCGGGGCTGCCCCGGGCCTCGGCCTCCATAGCAACAGCGTCCCCCTGGCTCTGGCTGGTGCACCCGTGGCCGGCTTTCCGCCGGGAGCCGTCGCGGGCGGGGGAGCTGGGCCGCCCCCCGGGCCCAAGAAGCCGGACCTGGGGGACCCGGGGACCGGAGCCGCAGCCGGCGGAGGAGGCAGT…	1	548	4	1644	1641	Human
MSH6_700_1361_pDONR221	ATGTTATCAATGGCTAATTTTGAAGAATATATTCCCTTGGATTCTGACACAGTCAGCACTACAAGATCTGGTGCTATCTTCACCAAAGCCTATCAACGAATGGTGCTAGATGCAGTGACATTAAACAACTTGGAGATTTTTCTGAATGGAACAAATGGTTCTACTGAAGGAACCCTACTAGAGAGGGTTGATACTTGCCATACTCCTTTTGGTAAGCGGCTCCTAAAGCAATGGCTTTGTGCCCCACTCTGTAACCATTATGCTATTAATGATCGTCTAGATGCCATAGAAGACCTCATGGTTGTGCCTGACAAAATCTCCGAAGTTGTAGAGCTTCTAAAGAAGCTTCCAGATCTTGAGAGGCTACTCAGTAAAATTCATAATGTTGGGTCTCCCCTG…	700	1361	2101	4083	1983	Human
ZFYVE26_1000_1500_pDONR221	ATGAGTAGCCTTGAAAGGCGGGGTCGACGGATAGACCACGTACTCCTAAATGCTGATGGCATTCGAGGTTTTCCAGTTGTTCTTCAGCAAATCAGTAAGAGTCTCAATTATCTGCTTATGTCAGCCAGTCAAACCAAATCAGAGAGTGTGGAAGAAAAGGGAGGAGGCCCTCCACGGTGCAGCATCACTGAACTGCTTCAGATGTGCTGGCCCAGCCTAAGCGAGGACTGTGTTGCCAGCCACACCACCCTCTCCCAGCAGCTAGATCAGGTCCTTCAGTCACTGAGAGAGGCACTAGAGCTGCCAGAGCCCAGGACTCCTCCACTGTCTTCCCTGGTGGAGCAGGCAGCCCAGAAAGCTCCAGAGGCAGAGGCCCACCCTGTGCAGATCCAGACTCAG…	1000	1500	3001	4500	1500	Human
WRN_1_500_pDONR221	ATGAGTGAAAAAAAATTGGAAACAACTGCACAGCAGCGGAAATGTCCTGAATGGATGAATGTGCAGAATAAAAGATGTGCTGTAGAAGAAAGAAAGGCATGTGTTCGGAAGAGTGTTTTTGAAGATGACCTCCCCTTCTTAGAATTCACTGGATCCATTGTGTATAGTTACGATGCTAGTGATTGCTCTTTCCTGTCAGAAGATATTAGCATGAGTCTATCAGATGGGGATGTGGTGGGATTTGACATGGAGTGGCCACCATTATACAATAGAGGGAAACTTGGCAAAGTTGCACTAATTCAGTTGTGTGTTTCTGAGAGCAAATGTTACTTGTTCCACGTTTCTTCCATGTCAGTTTTTCCCCAGGGATTAAAAATGTTGCTTGAAAATAAAGCAGTT…	1	500	4	1500	1497	Human
TP53BP1_400_900_pDONR221	ATGGTGTTATCTGAAGAAGGAGGAGAGCCTTTTCAGAAGAAACTTCAAAGTGGTGAACCAGTGGAGTTAGAAAACCCCCCTCTCCTGCCTGAGTCCACTGTATCACCACAAGCCTCAACACCAATATCTCAGAGCACACCAGTCTTCCCTCCTGGGTCACTTCCTATCCCATCCCAGCCTCAGTTTTCTCATGACATTTTTATTCCTTCCCCAAGTCTGGAAGAACAATCAAATGATGGGAAGAAAGATGGAGATATGCATAGTTCATCTTTGACAGTTGAGTGTTCTAAAACTTCAGAGATTGAACCAAAGAATTCCCCTGAGGATCTTGGGCTATCTTTGACAGGGGATTCTTGCAAGTTGATGCTTTCTACAAGTGAATATAGTCAGTCCCCAAAG…	400	900	1201	2700	1500	Human
SMG1_2000_2500_pDONR221	ATGGAGAAAATTGCAATCATGAGGGAGAAGCACACAGCTTTGATGAAGCCCATCGTATTTGCTTTGGAGCATGTGAGGAGTATCACAGCGGCTCCTGCAGAAACACCTCATGAAAAATGGTTTCAGGATAACTATGGTGATGCCATTGAAAATGCCCTAGAAAAACTGAAGACTCCATTGAACCCTGCAAAGCCTGGGAGCAGCTGGATTCCATTTAAAGAGATAATGCTAAGTTTGCAACAGAGAGCACAGAAACGTGCAAGTTACATCTTGCGTCTTGAAGAAATCAGTCCATGGTTGGCTGCCATGACTAACACTGAAATTGCTCTTCCTGGGGAAGTCTCAGCCAGAGACACTGTCACAATCCATAGTGTGGGCGGAACCATCACAATCTTACCG…	2000	2500	6001	7500	1500	Human
SLX4_1000_1500_pDONR221	ATGACAAGTGAGCCCGAGGAACAAAGTGGCGCTGTCAGGGAAAGGGGGCTGGAGGTTTCTCATCGCCTGGCTCCCTGGCAGGCATCTCCACCGCACCCGTGCCGCTTCCTATTGGGGCCTCCCCAGGGCGGGAGTCCCCGCGGGTCTCATCACACAAGTGGGTCGTCCCTGTCAACACCCCGGTCCCGTGGCGGAACTTCCCAGGTGGGCTCCCCAACCTTGCTGTCTCCAGCTGTGCCATCAAAGCAGAAAAGGGACAGGAGCATCCTCACGCTGTCTAAAGAGCCAGGGCACCAGAAAGGCAAAGAGCGTCGGTCCGTGCTGGAGTGCAGAAATAAGGGGGTCCTGATGTTCCCAGAAAAATCTCCGTCTATTGACCTAACCCAGTCAAATCCTGAC…	1000	1500	3001	4500	1500	Human
RNF20_1500_pDONR221	ATGTCAGGAATTGGAAATAAAAGAGCAGCTGGAGAACCTGGCACCTCCATGCCTCCTGAGAAGAAGGCAGCTGTTGAAGATTCAGGGACCACAGTGGAAACAATTAAGCTAGGAGGTGTCTCTTCAACGGAGGAACTAGACATTAGAACACTGCAAACCAAAAATCGCAAGCTGGCAGAAATGTTGGATCAGCGGCAGGCCATTGAAGATGAACTTCGTGAGCACATTGAAAAACTGGAACGACGACAGGCCACTGATGATGCCTCACTATTGATTGTCAACCGATACTGGAGTCAGTTTGATGAAAACATCCGTATCATCCTTAAACGTTATGATCTGGAGCAGGGCTTGGGAGACCTACTCACAGAACGAAAAGCCCTTGTTGTGCCTGAACCAGAA…	1	500	4	1500	1497	Human
RAD50_500_1000_pDONR221	ATGAAAATGGAAGTAATAAGTCTCCAAAATGAAAAAGCAGACTTAGACAGGACCCTGCGTAAACTTGACCAGGAGATGGAGCAGTTAAACCATCATACAACAACACGTACCCAAATGGAGATGCTGACCAAAGACAAAGCTGACAAAGATGAACAAATCAGAAAAATAAAATCTAGGCACAGTGATGAATTAACCTCACTGTTGGGATATTTTCCCAACAAAAAACAGCTTGAAGACTGGCTACATAGTAAATCAAAAGAAATTAATCAGACCAGGGACAGACTTGCCAAATTGAACAAGGAACTAGCTTCATCTGAGCAGAATAAAAATCATATAAATAATGAACTAAAAAGAAAGGAAGAGCAGTTGTCCAGTTACGAAGACAAGCTGTTTGATGTT…	500	1000	1501	3000	1500	Human
POLD1_1520_pDONR221	ATGGATGGCAAGCGGCGGCCAGGCCCAGGGCCCGGGGTGCCCCCAAAGCGGGCCCGTGGGGGCCTCTGGGATGATGATGATGCACCTCGGCCATCCCAATTCGAGGAGGACCTGGCACTGATGGAGGAGATGGAGGCAGAACACAGGCTGCAGGAGCAGGAGGAGGAGGAGCTGCAGTCAGTCCTGGAGGGGGTTGCAGACGGGCAGGTCCCACCATCAGCCATAGATCCTCGCTGGCTTCGGCCCACACCACCAGCGCTGGACCCCCAGACAGAGCCCCTCATCTTCCAACAGTTGGAGATTGACCATTATGTGGGCCCAGCGCAGCCTGTGCCTGGGGGGCCCCCACCATCCCGCGGCTCCGTGCCTGTGCTCCGCGCCTTCGGGGTCACCGATGAG…	1	520	4	1560	1557	Human
PAN2_6001200_pDONR221	ATGGATGAGGCCTCAGGCAAGGGCAATCTGGCCAGGCTCATTCAGAGGTGGAATCGCTTCATTCTCACTCAACTGCATCAAGATATGCAGGAGCTGGAAATACCACAGGCTTATCGAGGTGCTGGAGGCAGCAGCTTTTGCTCATCGGGGGACTCTGTTATTGGGCAGCTCTTCAGCTGTGAGATGGAGAACTGCAGCCTCTGCCGCTGTGGCAGTGAGACCGTGCGAGCCTCATCCACTCTGCTTTTCACACTCTCCTACCCTGATGGTAGCAAAAGTGATAAAACTGGGAAGAACTATGACTTTGCTCAGGTGCTGAAGCGAAGCATCTGCCTGGACCAGAATACACAGGCCTGGTGTGACACCTGTGAAAAGTACCAGCCCACGATTCAGACCCGC…	600	1200	1801	3600	1800	Human
MSH6_1_520_pDONR221	ATGTCGCGACAGAGCACCCTGTACAGCTTCTTCCCCAAGTCTCCGGCGCTGAGTGATGCCAACAAGGCCTCGGCCAGGGCCTCACGCGAAGGCGGCCGTGCCGCCGCTGCCCCCGGGGCCTCTCCTTCCCCAGGCGGGGATGCGGCCTGGAGCGAGGCTGGGCCTGGGCCCAGGCCCTTGGCGCGCTCCGCGTCACCGCCCAAGGCGAAGAACCTCAACGGAGGGCTGCGGAGATCGGTAGCGCCTGCTGCCCCCACCAGTTGTGACTTCTCACCAGGAGATTTGGTTTGGGCCAAGATGGAGGGTTACCCCTGGTGGCCTTGTCTGGTTTACAACCACCCCTTTGATGGAACATTCATCCGCGAGAAAGGGAAATCAGTCCGTGTTCATGTACAGTTT…	1	520	4	1560	1557	Human
ZFYVE26_1500_2000_pDONR221	ATGACGGCTGTCCAAGAAGGACTAAAGTGTGAGCTACAGAGGAAGCTGGCGGAGCTGCAGGTGTATCAGAAGATTCTGGGTTTGCAGTCTCCCCCAGTGTGGTGTGACTGGCAGACCTTGAGGAGCTGTTGTGTTGAGGACCCATCAACTGTCATGAACATGATTCTAGAAGCACAGGAGTATGAACTGTGTGAAGAGTGGGGCTGCCTGTACCCCATTCCAAGAGAACATTTAATCAGCCTTCATCAAAAGCATCTTCTCCACCTTCTAGAAAGAAGAGATCATGACAAGGCTCTGCAACTCCTGCGAAGAATCCCTGACCCCACCATGTGCCTTGAAGTGACAGAGCAATCCCTCGACCAGCACACTAGCTTGGCCACTTCTCACTTCTTGGCCAAC…	1500	2000	4501	6000	1500	Human
WRN_800_1200_pDONR221	ATGAGCACAAGGAAAGACATTCATCATAGGTTTGTAAGAGATGAAATTCAGTGTGTCATAGCTACCATAGCTTTTGGAATGGGCATTAATAAAGCTGACATTCGCCAAGTCATTCATTACGGTGCTCCTAAGGACATGGAATCATATTATCAGGAGATTGGTAGAGCTGGTCGTGATGGACTTCAAAGTTCTTGTCACGTCCTCTGGGCTCCTGCAGACATTAACTTAAATAGGCACCTTCTTACTGAGATACGTAATGAGAAGTTTCGATTATACAAATTAAAGATGATGGCAAAGATGGAAAAATATCTTCATTCTAGCAGATGTAGGAGACAAATCATCTTGTCTCATTTTGAGGACAAACAAGTACAAAAAGCCTCCTTGGGAATTATGGGAACT…	800	1200	2401	3600	1200	Human
TP53BP1_1400_1978_pDONR221	ATGCGTGGGCGTGGGCGAAGGGGCCGCCCACCTTCTCGGACCACTGGAACCAGAGAAACAGCTGTGCCTGGCCCCTTGGGCATAGAGGACATTTCACCTAACTTGTCACCAGATGATAAATCCTTCAGCCGTGTCGTGCCCCGAGTGCCAGACTCCACCAGACGAACAGATGTGGGTGCTGGTGCTTTGCGTCGTAGTGACTCTCCAGAAATTCCTTTCCAGGCTGCTGCTGGCCCTTCTGATGGCTTAGATGCCTCCTCTCCAGGAAATAGCTTTGTAGGGCTCCGTGTTGTAGCCAAGTGGTCATCCAATGGCTACTTTTACTCTGGGAAAATCACACGAGATGTCGGAGCTGGGAAGTATAAATTGCTCTTTGATGATGGGTACGAATGTGATGTG…	1400	1978	4201	5934	1734	Human
SMG1_3000_3600_pDONR221	ATGAGGAGTACTCAAGTTAATTTTTTTGATGATGATAATCACCGGCAGGTGCTAGAAGAGATTTTCTTTCTAAAAAGACTACAGACTATTAAGGAGTTCTTCAGGCTCTGTGGTACCTTTTCTAAAACATTGTCAGGATCAAGTTCACTTGAAGATCAGAATACTGTGAATGGGCCTGTACAGATTGTCAATGTGAAAACCCTTTTTAGAAACTCTTGTTTCAGTGAAGACCAAATGGCCAAACCTATCAAGGCATTCACAGCTGACTTTGTGAGGCAGCTCTTGATAGGGCTACCCAACCAAGCCCTCGGACTCACACTGTGCAGTTTTATCAGTGCTCTGGGTGTAGACATCATTGCTCAAGTAGAGGCAAAGGACTTTGGTGCCGAAAGCAAAGTT…	3000	3600	9001	10800	1800	Human
SLX4_1_500_pDONR221	ATGAAACTGAGTGTGAATGAGGCTCAGCTAGGCTTCTACTTGGGTTCACTTTCTCATCTGTCTGCCTGTCCTGGGATTGACCCTCGCTCCTCTGAAGACCAGCCTGAAAGCCTTAAAACTGGTCAGATGATGGATGAGTCTGATGAGGACTTTAAAGAACTCTGCGCTAGCTTTTTCCAAAGGGTGAAAAAACATGGAATCAAGGAAGTGTCAGGAGAAAGGAAGACACAAAAGGCTGCCTCAAACGGCACTCAGATAAGAAGCAAATTGAAAAGGACCAAACAAACTGCTACCAAGACCAAAACCCTTCAAGGCCCTGCAGAGAAGAAACCTCCGTCTGGCAGCCAGGCCCCTAGGACTAAAAAGCAAAGGGTAACCAAATGGCAAGCAAGTGAACCG…	1	500	4	1500	1497	Human
RFC1_5001140_pDONR221	ATGTCCAAACTGGAGAGAACACCCCAAAAAAATGTCCAAGGAAAAAGAAAAATTAGTCCATCTAAAAAGGAATCAGAATCTAAAAAGAGCAGGCCGACTTCCAAAAGGGACAGTTTGGCAAAGACAATAAAAAAGGAAACAGATGTGTTTTGGAAAAGCCTGGATTTCAAGGAGCAGGTGGCTGAGGAGACAAGTGGTGACAGCAAGGCTAGGAATTTGGCTGATGACAGCAGTGAAAACAAAGTGGAAAATTTGCTCTGGGTGGATAAATATAAGCCAACCTCGCTCAAGACCATAATTGGACAGCAAGGTGACCAGAGCTGTGCCAACAAACTCCTACGCTGGCTCCGAAACTGGCAAAAGAGTTCTTCCGAAGATAAAAAACACGCAGCAAAGTTT…	500	1140	1501	3420	1920	Human
PRKDC_1000_1500_pDONR221	ATGTTTGAAAGTCAGGATACTGTTGCCTTACTAGAAGCTATATTGGATGGAATTGTGGACCCTGTTGACAGTACTTTAAGAGATTTTTGTGGTCGGTGTATTCGAGAATTCCTTAAATGGTCCATTAAGCAAATAACACCACAGCAGCAGGAGAAGAGTCCAGTAAACACCAAATCGCTTTTCAAGCGACTTTATAGCCTTGCGCTTCACCCCAATGCTTTCAAGAGGCTGGGAGCATCACTTGCCTTTAATAATATCTACAGGGAATTCAGGGAAGAAGAGTCTCTGGTGGAACAGTTTGTGTTTGAAGCCTTGGTGATATACATGGAGAGTCTGGCCTTAGCACATGCAGATGAGAAGTCCTTAGGTACAATTCAACAGTGTTGTGATGCCATTGAT…	1000	1500	3001	4500	1500	Human
PMS2_400863_pDONR221	ATGGATCAATCCCCTTCATTAAGGACTGGAGAAGAAAAAAAAGACGTGTCCATTTCCAGACTGCGAGAGGCCTTTTCTCTTCGTCACACAACAGAGAACAAGCCTCACAGCCCAAAGACTCCAGAACCAAGAAGGAGCCCTCTAGGACAGAAAAGGGGTATGCTGTCTTCTAGCACTTCAGGTGCCATCTCTGACAAAGGCGTCCTGAGACCTCAGAAAGAGGCAGTGAGTTCCAGTCACGGACCCAGTGACCCTACGGACAGAGCGGAGGTGGAGAAGGACTCGGGGCACGGCAGCACTTCCGTGGATTCTGAGGGGTTCAGCATCCCAGACACGGGCAGTCACTGCAGCAGCGAGTATGCGGCCAGCTCCCCAGGGGACAGGGGCTCGCAGGAACAT…	400	863	1201	2589	1389	Human
PAN2_1600_pDONR221	ATGAACTTTGAGGGTCTGGACCCTGGACTGGCAGAATATGCCCCAGCCATGCATTCTGCCCTGGACCCTGTCTTGGATGCCCACCTGAACCCAAGTCTGCTACAGAATGTGGAGCTGGACCCAGAGGGAGTGGCCTTGGAGGCTCTTCCCGTCCAGGAATCAGTGCACATAATGGAAGGTGTCTACTCTGAATTGCACAGCGTGGTGGCTGAAGTGGGTGTACCTGTTTCCGTCTCCCACTTTGACTTGCACGAGGAGATGCTGTGGGTGGGGAGCCACGGGGGCCATGCCACTTCATTTTTTGGCCCAGCCTTGGAGCGCTACTCATCCTTTCAAGTCAATGGCAGTGATGATATTCGGCAGATCCAGAGCCTGGAGAATGGTATCCTTTTTCTCACC…	1	600	4	1800	1797	Human
MSH6_360_900_pDONR221	ATGCGCCCTACTGTTTGGTATCATGAAACTTTAGAATGGCTTAAGGAGGAAAAGAGAAGAGATGAGCACAGGAGGAGGCCTGATCACCCCGATTTTGATGCATCTACACTCTATGTGCCTGAGGATTTCCTCAATTCTTGTACTCCTGGGATGAGGAAGTGGTGGCAGATTAAGTCTCAGAACTTTGATCTTGTCATCTGTTACAAGGTGGGGAAATTTTATGAGCTGTACCACATGGATGCTCTTATTGGAGTCAGTGAACTGGGGCTGGTATTCATGAAAGGCAACTGGGCCCATTCTGGCTTTCCTGAAATTGCATTTGGCCGTTATTCAGATTCCCTGGTGCAGAAGGGCTATAAAGTAGCACGAGTGGAACAGACTGAGACTCCAGAAATGATG…	360	900	1081	2700	1620	Human
ZFYVE26_1_500_pDONR221	ATGAATCATCCATTTGGAAAAGAGGAAGCTGCTTCGCAGAAGCAGCTTTTTGGATTTTTCTGCGAATGCCTGCGGAGGGGAGAATGGGAGCTGGCACAGGCATGTGTACCTCAGCTACAGGAGGGACAAGGGGATATCCCAAAGAGGGTAGAAGACATACTTCAGGCATTGGTGGTGTGTCCAAATCTGCTGAGATGTGGGCAGGACATCAACCCTCAAAGAGTAGCCTGGGTCTGGCTTCTTGTACTGGAGAAATGGTTGGCCCGGGAAAAGAAGTTACTCCCAGTTGTTTTCCGGAGAAAGCTTGAGTTTCTTTTATTGTCAGAAGACCTCCAAGGTGACATTCCAGAGAACATCCTCGAGGAGCTGTATGAGACCTTAACACAGGGTGCAGTAGGC…	1	500	4	1500	1497	Human
WRN_900_1433_pDONR221	ATGAAATATCTTCATTCTAGCAGATGTAGGAGACAAATCATCTTGTCTCATTTTGAGGACAAACAAGTACAAAAAGCCTCCTTGGGAATTATGGGAACTGAAAAATGCTGTGATAATTGCAGGTCCAGATTGGATCATTGCTATTCCATGGATGACTCAGAGGATACATCCTGGGACTTTGGTCCACAAGCATTTAAGCTTTTGTCTGCTGTGGACATCTTAGGCGAAAAATTTGGAATTGGGCTTCCAATTTTATTTCTCCGAGGATCTAATTCTCAGCGTCTTGCCGATCAATATCGCAGGCACAGTTTATTTGGCACTGGCAAGGATCAAACAGAGAGTTGGTGGAAGGCTTTTTCCCGTCAGCTGATCACTGAGGGATTCTTGGTAGAAGTTTCT…	900	1433	2701	4299	1599	Human
TONSL_900_1379_pDONR221	ATGGAACCTCCAGGGAGCCCCAGCACCCCCAGGGTCTCAGAGCCCAGTGGGGACAGCTCTGCGGCAGGCCAGCCCTTGGGTCCGGCCCCGCCCCCTCCCATCCGGGTTCGAGTTCAAGTTCAGGATCATCTCTTCCTCATCCCTGTCCCACACAGCAGTGACACCCACTCTGTGGCCTGGCTGGCCGAGCAGGCGGCCCAGCGCTACTACCAGACCTGCGGGCTGCTGCCCAGGCTCACCCTACGGAAAGAGGGGGCCCTGCTGGCCCCACAGGACCTCATCCCTGATGTGCTGCAGAGCAATGACGAGGTGTTGGCTGAGGTGACTTCGTGGGACCTGCCCCCGTTGACTGACCGCTACCGCAGGGCCTGCCAGAGCCTGGGGCAAGGGGAGCACCAA…	900	1379	2701	4137	1437	Human
SMG1_1_500_pDONR221	ATGAGCCGCAGAGCCCCGGGGTCTCGGCTGAGCAGCGGCGGCGGCGGCGGCGGCACCAAGTATCCGCGGAGCTGGAATGACTGGCAACCCAGAACTGATAGTGCATCAGCCGACCCAGATAATTTAAAATATTCTTCATCCAGAGATAGAGGTGGTTCTTCCTCTTATGGACTGCAACCTTCAAATTCAGCTGTGGTGTCTCGGCAAAGGCACGATGATACCAGAGTCCACGCTGACATACAGAATGACGAAAAGGGTGGCTACAGTGTCAATGGAGGATCTGGGGAAAATACTTATGGTCGGAAGTCGTTGGGGCAAGAGCTGAGGGTTAACAATGTGACCAGCCCTGAGTTCACCAGTGTTCAGCATGGCAGTCGTGCTTTAGCCACCAAAGACATG…	1	500	4	1500	1497	Human
SIRT1_1500_pDONR221	ATGGCGGACGAGGCGGCCCTCGCCCTTCAGCCCGGCGGCTCCCCCTCGGCGGCGGGGGCCGACAGGGAGGCCGCGTCGTCCCCCGCCGGGGAGCCGCTCCGCAAGAGGCCGCGGAGAGATGGTCCCGGCCTCGAGCGGAGCCCGGGCGAGCCCGGTGGGGCGGCCCCAGAGCGTGAGGTGCCGGCGGCGGCCAGGGGCTGCCCGGGTGCGGCGGCGGCGGCGCTGTGGCGGGAGGCGGAGGCAGAGGCGGCGGCGGCAGGCGGGGAGCAAGAGGCCCAGGCGACTGCGGCGGCTGGGGAAGGAGACAATGGGCCGGGCCTGCAGGGCCCATCTCGGGAGCCACCGCTGGCCGACAACTTGTACGACGAAGACGACGACGACGAGGGCGAGGAGGAGGAA…	1	500	4	1500	1497	Human
RFC1_1500_pDONR221	ATGGACATTCGGAAATTCTTTGGAGTAATACCAAGTGGAAAGAAACTTGTAAGTGAAACAGTAAAGAAGAATGAGAAAACAAAGTCTGATGAAGAAACTTTAAAAGCAAAGAAAGGAATAAAGGAAATCAAGGTAAATAGCTCCCGTAAAGAGGATGACTTCAAACAAAAGCAACCAAGCAAGAAAAAGAGGATCATCTATGATTCAGATTCAGAGTCAGAGGAGACGTTGCAGGTAAAAAATGCCAAAAAGCCACCAGAAAAACTGCCAGTATCTTCTAAACCTGGTAAAATTTCACGGCAGGATCCTGTTACATACATTTCAGAAACAGATGAAGAAGATGACTTTATGTGTAAGAAGGCGGCCTCTAAATCAAAAGAGAATGGAAGATCTACAAAT…	1	500	4	1500	1497	Human
PRKDC_2900_3500_pDONR221	ATGCTGCCTGCTGAGCTGCCTGCCAAGCGAGTCCGTGGGAAGGCCCGCCTCCCTCCTGATGTCCTCAGATGGGTGGAGCTTGCTAAGCTGTATAGATCAATTGGAGAATACGACGTCCTCCGTGGGATTTTTACCAGTGAGATAGGAACAAAGCAAATCACTCAGAGTGCATTATTAGCAGAAGCCAGAAGTGATTATTCTGAAGCTGCTAAGCAGTATGATGAGGCTCTCAATAAACAAGACTGGGTAGATGGTGAGCCCACAGAAGCCGAGAAGGATTTTTGGGAACTTGCATCCCTTGACTGTTACAACCACCTTGCTGAGTGGAAATCACTTGAATACTGTTCTACAGCCAGTATAGACAGTGAGAACCCCCCAGACCTAAATAAAATCTGGAGT…	2900	3500	8701	10500	1800	Human
PMS2_1400_pDONR221	ATGGAGCGAGCTGAGAGCTCGAGTACAGAACCTGCTAAGGCCATCAAACCTATTGATCGGAAGTCAGTCCATCAGATTTGCTCTGGGCAGGTGGTACTGAGTCTAAGCACTGCGGTAAAGGAGTTAGTAGAAAACAGTCTGGATGCTGGTGCCACTAATATTGATCTAAAGCTTAAGGACTATGGAGTGGATCTTATTGAAGTTTCAGACAATGGATGTGGGGTAGAAGAAGAAAACTTCGAAGGCTTAACTCTGAAACATCACACATCTAAGATTCAAGAGTTTGCCGACCTAACTCAGGTTGAAACTTTTGGCTTTCGGGGGGAAGCTCTGAGCTCACTTTGTGCACTGAGCGATGTCACCATTTCTACCTGCCACGCATCGGCGAAGGTTGGAACT…	1	400	4	1200	1197	Human
PALB2_1500_pDONR221	ATGGACGAGCCTCCCGGGAAGCCCCTCAGCTGTGAGGAGAAGGAAAAGTTAAAGGAGAAATTAGCATTCTTGAAAAGGGAATACAGCAAGACACTAGCCCGCCTTCAGCGTGCCCAAAGAGCTGAAAAGATTAAGCATTCTATTAAGAAAACAGTAGAAGAACAAGATTGTTTGTCTCAGCAGGATCTCTCACCGCAGCTAAAACACTCAGAACCTAAAAATAAAATATGTGTTTATGACAAGTTACACATCAAAACCCATCTTGATGAAGAAACTGGAGAAAAGACATCTATCACACTTGATGTTGGGCCTGAGTCCTTTAACCCTGGAGATGGCCCAGGAGGATTACCTATACAAAGAACAGATGACACCCAAGAACATTTTCCCCACAGGGTCAGT…	1	500	4	1500	1497	Human
MSH4_1500_pDONR221	ATGCTGAGGCCTGAGATCTCATCAACCTCGCCTTCTGCCCCGGCGGTTTCCCCGTCGTCGGGAGAAACCCGCTCACCTCAGGGTCCCCGCTACAATTTCGGACTCCAGGAGACTCCACAGAGCCGCCCTTCGGTCCAGGTGGTCTCTGCATCCACCTGTCCTGGCACGTCAGGAGCTGCGGGCGACCGGAGCAGCAGCAGCAGCAGCCTTCCCTGCCCCGCGCCAAACTCCCGGCCAGCTCAAGGTTCATACTTTGGAAACAAAAGAGCTTATGCAGAAAACACAGTTGCATCAAATTTTACTTTTGGTGCAAGCTCATCTTCTGCACGAGATACTAATTATCCTCAAACACTTAAAACTCCATTGTCTACTGGAAATCCTCAGAGATCAGGTTATAAG…	1	500	4	1500	1497	Human
XRN2_300900_pDONR221	ATGTTTATCTTCCTTCGGCTTAATGTTCTTCGTGAGTATTTGGAAAGAGAACTCACAATGGCCAGCCTACCATTCACATTTGATGTTGAGAGGAGCATTGATGACTGGGTTTTCATGTGCTTCTTTGTGGGAAATGACTTCCTCCCTCATTTGCCATCGTTAGAGATTAGGGAAAATGCAATTGACCGTTTGGTTAACATATACAAAAATGTGGTACACAAAACTGGGGGTTACCTTACAGAAAGTGGTTATGTCAATCTGCAAAGAGTACAGATGATCATGTTAGCAGTTGGTGAAGTTGAGGATAGCATTTTTAAAAAGAGAAAGGATGATGAGGACAGTTTTAGAAGACGACAGAAAGAAAAAAGAAAGAGAATGAAGAGAGATCAACCAGCTTTC…	300	900	901	2700	1800	Human
UVSSA_150710_pDONR221	ATGGCTCGGAGTCTGGCAGAAAGGAAGAGAGAAGAGGAGAAGCAGAAGCACTTGGATAAAATTTATCAAGAAAGAGCCAGCCAGGCGGAGAGGGAGATGCAAGAAATGTCTGGAGAAATTGAATCCTGCTTGACGGAGGTAGAGAGCTGCTTTAGGCTGCTGGTGCCTTTTGACTTTGACCCGAACCCGGAGACGGAATCCCTTGGCATGGCTTCTGGCATGTCCGATGCCCTTCGCTCCTCCTGCGCGGGCCAGGTGGGCCCCTGCCGGTCTGGCACCCCTGACCCCCGGGACGGGGAGCAGCCCTGCTGCAGTAGAGACCTGCCTGCCTCTGCAGGCCACCCCAGAGCGGGCGGCGGGGCACAGCCATCCCAGACAGCCACAGGTGACCCCTCAGAT…	150	710	451	2130	1680	Human
TONSL_1_500_pDONR221	ATGAGCCTGGAGCGCGAGCTTCGCCAGCTGAGCAAGGCGAAAGCCAAGGCGCAGAGGGCCGGGCAGCGGCGCGAAGAGGCCGCGCTGTGCCACCAGCTGGGGGAGCTCCTGGCCGGCCATGGCCGCTACGCCGAGGCTCTGGAGCAGCACTGGCAGGAGCTGCAGCTTCGGGAGCGCGCTGACGACCCTCTGGGCTGTGCCGTGGCCCACCGCAAGATCGGAGAGCGCCTGGCCGAGATGGAGGACTACCCGGCTGCCTTGCAGCACCAGCACCAGTACCTGGAGCTGGCACATTCCCTGCGCAACCACACGGAGCTGCAGAGGGCCTGGGCCACCATCGGCCGCACCCACCTGGACATCTATGACCACTGCCAGTCGAGGGATGCTTTGCTGCAGGCA…	1	500	4	1500	1497	Human
SMG_500_1000_pDONR221	ATGTTGAATTTACTCACGCTGATTGTTGAACAGATAAATACGAAACTGCCATCATCATTTGTAGAAAAACTGTTTATACCATCATCTAAACTACTATTCTTGCGTTATCATAAAGAAAAAGAGGTTGTTGCTGTAGCCCATGCTGTTTATCAAGCAGTGCTCAGCTTGAAGAATATTCCTGTTTTGGAGACTGCCTATAAGTTAATATTGGGAGAAATGACTTGTGCCCTAAACAACCTCCTACACAGTCTACAACTTCCTGAGGCCTGTTCTGAAATAAAACATGAGGCTTTTAAGAATCATGTGTTCAATGTAGACAATGCAAAATTTGTAGTTATATTTGACCTCAGTGCCCTGACTACAATTGGAAATGCCAAAAACTCACTAATAGGGATGTGG…	500	1000	1501	3000	1500	Human
SIRT1_150600_pDONR221	ATGGAAATTATCACTAATGGTTTTCATTCCTGTGAAAGTGATGAGGAGGATAGAGCCTCACATGCAAGCTCTAGTGACTGGACTCCAAGGCCACGGATAGGTCCATATACTTTTGTTCAGCAACATCTTATGATTGGCACAGATCCTCGAACAATTCTTAAAGATTTATTGCCGGAAACAATACCTCCACCTGAGTTGGATGATATGACACTGTGGCAGATTGTTATTAATATCCTTTCAGAACCACCAAAAAGGAAAAAAAGAAAAGATATTAATACAATTGAAGATGCTGTGAAATTACTGCAAGAGTGCAAAAAAATTATAGTTCTAACTGGAGCTGGGGTGTCTGTTTCATGTGGAATACCTGACTTCAGGTCAAGGGATGGTATTTATGCTCGC…	150	600	451	1800	1350	Human
RBBP8_400903_pDONR221	ATGTCATCTAATAAACAGATACTTATAAATAAAAATATAAGTGAATCCCTAGGTGAACAGAATAGGACTGAGTACGGTAAAGATTCTAACACTGATAAACATTTGGAGCCCCTGAAATCATTGGGAGGCCGAACATCCAAAAGGAAGAAAACTGAGGAAGAAAGTGAACATGAAGTAAGCTGCCCCCAAGCTTCTTTTGATAAAGAAAATGCTTTCCCTTTTCCAATGGATAATCAGTTTTCCATGAATGGAGACTGTGTGATGGATAAACCTCTGGATCTGTCTGATCGATTTTCAGCTATTCAGCGTCAAGAGAAAAGCCAAGGAAGTGAGACTTCTAAAAACAAATTTAGGCAAGTGACTCTTTATGAGGCTTTGAAGACCATTCCAAAGGGCTTT…	400	903	1201	2709	1509	Human
PRKDC_1500_2000_pDONR221	ATGCCTTCTCTAGACCTCAGTTGTAAGCAGCTGGCCAGCGGACTTCTGGAGTTAGCCTTTGCTTTTGGAGGACTGTGTGAGCGCCTTGTGAGTCTTCTCCTGAACCCAGCGGTGCTGTCCACGGCGTCCTTGGGCAGCTCACAGGGCAGCGTCATCCACTTCTCCCATGGGGAGTATTTCTATAGCTTGTTCTCAGAAACGATCAACACGGAATTATTGAAAAATCTGGATCTTGCTGTATTGGAGCTCATGCAGTCTTCAGTGGATAATACCAAAATGGTGAGTGCCGTTTTGAACGGCATGTTAGACCAGAGCTTCAGGGAGCGAGCAAACCAGAAACACCAAGGACTGAAACTTGCGACTACAATTCTGCAACACTGGAAGAAGTGTGATTCATGG…	1500	2000	4501	6000	1500	Human
PMS1_1500_pDONR221	ATGAAACAATTGCCTGCGGCAACAGTTCGACTCCTTTCAAGTTCTCAGATCATCACTTCGGTGGTCAGTGTTGTAAAAGAGCTTATTGAAAACTCCTTGGATGCTGGTGCCACAAGCGTAGATGTTAAACTGGAGAACTATGGATTTGATAAAATTGAGGTGCGAGATAACGGGGAGGGTATCAAGGCTGTTGATGCACCTGTAATGGCAATGAAGTACTACACCTCAAAAATAAATAGTCATGAAGATCTTGAAAATTTGACAACTTACGGTTTTCGTGGAGAAGCCTTGGGGTCAATTTGTTGTATAGCTGAGGTTTTAATTACAACAAGAACGGCTGCTGATAATTTTAGCACCCAGTATGTTTTAGATGGCAGTGGCCACATACTTTCTCAGAAA…	1	500	4	1500	1497	Human
PALB2_5001100_pDONR221	ATGAGGAAGGCAGTTGCCCAAGCACCTGGTAGAAGATACACAGGAAAAAGAAAATCAGCCTGCACCCCAGCATCAGATCATTGTGAACCACTTTTGCCAACTTCTAGCCTGTCGATTGTTAACAGGTCCAAGGAAGAAGTCACCTCACACAAATATCAGCACGAAAAATTATTTATTCAAGTGAAAGGGAAGAAAAGTCGTCATCAAAAAGAGGATTCCCTTTCTTGGAGTAATAGTGCTTATTTATCCTTGGATGATGATGCTTTCACGGCTCCATTTCATAGGGATGGAATGCTGAGTTTAAAGCAACTACTGTCTTTTCTCAGTATCACAGACTTTCAGTTACCTGATGAAGACTTTGGACCTCTTAAGCTTGAAAAAGTGAAGTCCTGCTCAGAA…	500	1100	1501	3300	1800	Human
MSH4_300937_pDONR221	ATGATTTGTTTCCAGGGTAGTGAACAGACAGCCATGATAGATTCATCATCAGCCCAAAACCTTGAATTGTTAATTAATAATCAAGACTATAGGAATAATCACACTCTCTTTGGTGTTCTAAATTATACTAAGACTCCTGGAGGGAGTAGACGACTTCGTTCTAATATATTAGAGCCTCTAGTTGATATTGAAACCATTAACATGAGATTAGATTGTGTTCAAGAACTACTTCAAGATGAGGAACTATTTTTTGGACTTCAATCAGTTATATCAAGATTTCTTGATACAGAGCAGCTTCTTTCTGTTTTAGTCCAAATTCCAAAGCAAGACACGGTCAATGCTGCTGAATCAAAGATAACAAATTTAATATACTTAAAACATACCTTGGAACTTGTGGAT…	300	937	901	2811	1911	Human
XRN2_1600_pDONR221	ATGGGAGTCCCGGCGTTCTTCCGCTGGCTCAGCCGCAAGTACCCGTCCATCATAGTCAACTGCGTGGAAGAGAAGCCAAAAGAATGCAATGGTGTAAAGATTCCAGTTGATGCCAGTAAACCTAATCCAAATGATGTGGAGTTTGATAATCTGTATTTGGATATGAATGGAATCATCCATCCCTGTACTCATCCTGAAGACAAACCAGCACCAAAAAATGAAGATGAAATGATGGTTGCAATTTTTGAGTACATTGACAGACTTTTCAGTATTGTAAGACCAAGAAGACTTCTCTACATGGCAATAGATGGAGTGGCACCACGTGCTAAAATGAACCAGCAGCGTTCAAGGAGGTTCAGGGCATCAAAAGAAGGAATGGAAGCAGCAGTCGAGAAGCAG…	1	600	4	1800	1797	Human
UVSSA_1600_pDONR221	ATGGATCAGAAACTTTCGAAGTTGGTAGAAGAGCTCACAACTTCAGGAGAACCCCGACTAAATCCTGAGAAAATGAAGGAACTGAAGAAAATTTGCAAGTCTTCAGAGGAGCAGCTGAGCCGCGCCTACCGCCTGCTGATAGCACAGCTGACCCAGGAGCACGCCGAGATCCGTCTCTCAGCCTTCCAGATTGTGGAGGAACTCTTCGTCAGGTCTCACCAGTTCCGGATGCTGGTTGTTTCCAACTTCCAGGAGTTCCTGGAGCTCACGCTGGGCACAGACCCCGCACAGCCTCTGCCGCCCCCCAGGGAGGCGGCACAGAGGCTGAGGCAGGCGACCACCCGGGCCGTGGAAGGGTGGAATGAGAAGTTTGGGGAGGCCTACAAGAAGCTTGCCTTG…	1	600	4	1800	1797	Human
TONSL_500_1000_pDONR221	ATGACCCCGCAGCTGGAGGAGGACGAGGAGCTTCAGGGCCACCTGGGCCGGCGGAAGGGGAGCAAGTGGAACCGGCGAAACGACATGGGGGAGACCCTGCTGCACCGAGCCTGCATCGAGGGCCAGCTGCGCCGCGTCCAGGACCTTGTGAGGCAGGGCCACCCCCTTAACCCTCGGGACTACTGTGGCTGGACACCTCTGCACGAGGCCTGCAACTACGGGCATCTAGAAATTGTCCGCTTCCTGCTGGACCACGGGGCCGCAGTGGACGACCCAGGTGGCCAGGGCTGCGAAGGCATCACCCCCCTCCACGATGCCCTCAACTGTGGCCACTTCGAGGTGGCTGAGCTGCTGCTTGAACGGGGGGCGTCCGTCACCCTCCGCACTCGAAAGGGCCTC…	500	1000	1501	3000	1500	Human
SMC6_1500_pDONR221	ATGGCCAAAAGAAAGGAAGAAAATTTTTCCTCTCCTAAAAATGCCAAAAGGCCAAGACAAGAAGAATTGGAGGATTTTGATAAAGATGGTGACGAAGACGAATGTAAAGGTACTACTTTGACTGCAGCAGAAGTTGGAATAATTGAGAGTATTCACCTAAAAAACTTCATGTGTCATTCAATGCTTGGACCTTTTAAGTTTGGTTCTAATGTCAACTTTGTTGTTGGCAACAATGGAAGTGGGAAGAGTGCAGTACTCACAGCTCTCATAGTCGGTCTTGGTGGAAGAGCAGTTGCTACTAATAGAGGATCCTCTTTAAAAGGTTTTGTGAAAGATGGACAGAACTCTGCAGATATCTCAATAACATTGAGGAACAGAGGAGATGATGCCTTTAAAGCC…	1	500	4	1500	1497	Human
SETD2_1500_2000_pDONR221	ATGTGTACACCTCTTTCTAAAGATGAAAGAGCTCAAGGTGAAATAGCATGTGGGGAAGATTGTCTTAATCGTCTTCTCATGATTGAATGTTCTTCTCGGTGTCCAAATGGGGATTATTGTTCCAATAGACGGTTTCAGAGAAAACAGCATGCAGATGTGGAAGTCATACTCACAGAAAAGAAAGGCTGGGGCTTGAGAGCTGCCAAAGACCTTCCTTCGAACACCTTTGTCCTAGAATATTGTGGAGAGGTACTCGATCATAAAGAGTTTAAAGCTCGAGTGAAGGAGTATGCACGAAACAAAAACATCCATTACTATTTCATGGCCCTGAAGAATGATGAGATAATAGATGCCACTCAAAAAGGAAATTGCTCTCGTTTCATGAATCACAGCTGTGAA…	1500	2000	4501	6000	1500	Human
RBBP8_200800_pDONR221	ATGAATGAAATGAGAAAAGTTTCCAAGTCTTCAACTCATCCACAACATAATCCTAATGAAAATGAAATTCTAGTAGCTGACACTTATGACCAAAGTCAATCTCCAATGGCCAAAGCACATGGAACAAGCAGCTATACCCCTGATAAGTCATCTTTTAATTTAGCTACAGTTGTTGCTGAAACACTTGGACTTGGTGTTCAAGAAGAATCTGAAACTCAAGGTCCCATGAGCCCCCTTGGTGATGAGCTCTACCACTGTCTGGAAGGAAATCACAAGAAACAGCCTTTTGAGGAATCTACAAGAAATACTGAAGATAGTTTAAGATTTTCAGATTCTACTTCAAAGACTCCTCCTCAAGAAGAATTACCTACTCGAGTGTCATCTCCTGTATTTGGAGCT…	200	800	601	2400	1800	Human
PRKDC_3700_4129_pDONR221	ATGATTCCCGGTCAGTATGACGGTAGGGGAAAGCCATTGCCAGAGTACCACGTGCGAATCGCCGGGTTTGATGAGCGGGTGACAGTCATGGCGTCTCTGCGAAGGCCCAAGCGCATCATCATCCGTGGCCATGACGAGAGGGAACACCCTTTCCTGGTGAAGGGTGGCGAGGACCTGCGGCAGGACCAGCGCGTGGAGCAGCTCTTCCAGGTCATGAATGGGATCCTGGCCCAAGACTCCGCCTGCAGCCAGAGGGCCCTGCAGCTGAGGACCTATAGCGTTGTGCCCATGACCTCCAGGTTAGGATTAATTGAGTGGCTTGAAAATACTGTTACCTTGAAGGACCTTCTTTTGAACACCATGTCCCAAGAGGAGAAGGCGGCTTACCTGAGTGATCCC…	3700	4129	11101	12387	1287	Human
PMS_400933_pDONR221	ATGAAAAACACTGATGATTGTTTAAATCACCAGATAAGTATTGGTGACTTTGGTTATGGTCATTGTAGTAGTGAAATTTCTAACATTGATAAAAACACTAAGAATGCATTTCAGGACATTTCAATGAGTAATGTATCATGGGAGAACTCTCAGACGGAATATAGTAAAACTTGTTTTATAAGTTCCGTTAAGCACACCCAGTCAGAAAATGGCAATAAAGACCATATAGATGAGAGTGGGGAAAATGAGGAAGAAGCAGGTCTTGAAAACTCTTCGGAAATTTCTGCAGATGAGTGGAGCAGGGGAAATATACTTAAAAATTCAGTGGGAGAGAATATTGAACCTGTGAAAATTTTAGTGCCTGAAAAAAGTTTACCATGTAAAGTAAGTAATAATAAT…	400	933	1201	2799	1599	Human
NBN_1500_pDONR221	ATGTGGAAACTGCTGCCCGCCGCGGGCCCGGCAGGAGGAGAACCATACAGACTTTTGACTGGCGTTGAGTACGTTGTTGGAAGGAAAAACTGTGCCATTCTGATTGAAAATGATCAGTCGATCAGCCGAAATCATGCTGTGTTAACTGCTAACTTTTCTGTAACCAACCTGAGTCAAACAGATGAAATCCCTGTATTGACATTAAAAGATAATTCTAAGTATGGTACCTTTGTTAATGAGGAAAAAATGCAGAATGGCTTTTCCCGAACTTTGAAGTCGGGGGATGGTATTACTTTTGGAGTGTTTGGAAGTAAATTCAGAATAGAGTATGAGCCTTTGGTTGCATGCTCTTCTTGTTTAGATGTCTCTGGGAAAACTGCTTTAAATCAAGCTATATTG…	1	500	4	1500	1497	Human
MSH3_5001138_pDONR221	ATGTGCTCTTTGGCTGCCATCATAAAATACCTCAAAGAATTCAACTTGGAAAAGATGCTCTCCAAACCTGAGAATTTTAAACAGCTATCAAGTAAAATGGAATTTATGACAATTAATGGAACAACATTAAGGAATCTGGAAATCCTACAGAATCAGACTGATATGAAAACCAAAGGAAGTTTGCTGTGGGTTTTAGACCACACTAAAACTTCATTTGGGAGACGGAAGTTAAAGAAGTGGGTGACCCAGCCACTCCTTAAATTAAGGGAAATAAATGCCCGGCTTGATGCTGTATCGGAAGTTCTCCATTCAGAATCTAGTGTGTTTGGTCAGATAGAAAATCATCTACGTAAATTGCCCGACATAGAGAGGGGACTCTGTAGCATTTATCACAAAAAA…	500	1138	1501	3414	1914	Human
XPC_1500_pDONR221	ATGGCTCGGAAACGCGCGGCCGGCGGGGAGCCGCGGGGACGCGAACTGCGCAGCCAGAAATCCAAGGCCAAGAGCAAGGCCCGGCGTGAGGAGGAGGAGGAGGATGCCTTTGAAGATGAGAAACCCCCAAAGAAGAGCCTTCTCTCCAAAGTTTCACAAGGAAAGAGGAAAAGAGGCTGCAGTCATCCTGGGGGTTCAGCAGATGGTCCAGCAAAAAAGAAAGTGGCCAAGGTGACTGTTAAATCTGAAAACCTCAAGGTTATAAAGGATGAAGCCCTCAGCGATGGGGATGACCTCAGGGACTTTCCAAGTGACCTCAAGAAGGCACACCATCTGAAGAGAGGGGCTACCATGAATGAAGACAGCAATGAAGAAGAGGAAGAAAGTGAAAATGATTGG…	1	500	4	1500	1497	Human
USP7_5401102_pDONR221	ATGGTGGAGCGATTACAAGAAGAGAAAAGGATCGAGGCTCAGAAGCGGAAGGAGCGGCAGGAAGCCCATCTCTATATGCAAGTGCAGATAGTCGCAGAGGACCAGTTTTGTGGCCACCAAGGGAATGACATGTACGATGAAGAAAAAGTGAAATACACTGTGTTCAAAGTATTGAAGAACTCCTCGCTTGCTGAGTTTGTTCAGAGCCTCTCTCAGACCATGGGATTTCCACAAGATCAAATTCGATTGTGGCCCATGCAAGCAAGGAGTAATGGAACAAAACGACCAGCAATGTTAGATAATGAAGCCGACGGCAATAAAACAATGATTGAGCTCAGTGATAATGAAAACCCTTGGACAATATTCCTGGAAACAGTTGATCCCGAGCTGGCTGCTAGT…	540	1102	1621	3306	1686	Human
SPIDR_400916_pDONR221	ATGTACTGTCCGGACATACCCCTTCCAAGAAGAAGCATCTCTTTGGCCCAGATGTTTGTAATTAAGGGTCTAACAAATAATTCACCTGAAATCCAGGTTGTGTGTAGTGGTGTAGCCACTACAGGGACAGCCTGGACCCATGGGCACAAAGAAGCAAAACAGCGCATCCCAACCAGCACTCCCCTGAGGGATTCTCTCCTGGATGTGGTGGAAAGCCAGGGAGCTGCCTCGTGGCCAGGAGCTGGAGTCCGAGTGGTGGTGCAAAGAGTGTATTCTCTTCCCAGCAGAGACAGCACCAGGGGTCAGCAGGGGGCCAGCTCAGGACACACAGACCCAGCTGGAACTCGAGCCTGCCTTCTGGTACAAGATGCCTGTGGAATGTTCGGTGAAGTGCACTTG…	400	916	1201	2748	1548	Human
SMC6_5001092_pDONR221	ATGACCTATAAACCTGTAGGCCCTTTAGGAGCTTGCATTCATCTTCGGGACCCAGAACTTGCTTTGGCTATTGAATCTTGCTTAAAAGGGCTTCTGCAGGCCTATTGTTGCCATAATCATGCTGATGAAAGGGTCCTTCAGGCACTCATGAAAAGGTTTTATTTACCAGGGACCTCACGGCCACCGATAATAGTTTCTGAGTTTCGGAATGAGATATATGATGTAAGACACAGAGCTGCTTATCATCCAGACTTTCCAACAGTTCTGACAGCTTTAGAAATAGATAATGCGGTTGTGGCAAATAGCCTAATTGACATGAGAGGCATAGAGACAGTGCTACTAATCAAAAATAATTCTGTAGCTCGTGCAGTAATGCAGTCCCAAAAGCCACCCAAAAAT…	500	1092	1501	3276	1776	Human
SETD2_1000_1500_pDONR221	ATGTCTTCTTGTGATTTGAATTTAACCATGGAAGACAGTGATGGTGTAACTTATGCATTAAAGTGTGACAGTAGTGGTCATGCCCCAGAAATTGTGTCTACAGTTCATGAAGATTATTCTGGCTCTTCTGAAAGTTCAAATGATGAAAGTGATTCAGAAGATACAGATTCGGATGATAGCAGTATTCCAAGAAACCGTCTCCAGTCTGTTGTGGTTGTGCCAAAGAATTCTACTTTGCCCATGGAAGAAACAAGTCCTTGTTCTTCTCGGAGCAGTCAAAGTTATAGACACTATTCTGACCATTGGGAAGATGAGAGATTGGAGTCAAGGAGACATTTGTATGAGGAAAAATTTGAAAGTATAGCAAGTAAAGCCTGTCCTCAAACTGATAAGTTTTTC…	1000	1500	3001	4500	1500	Human
RBBP8_1500_pDONR221	ATGAACATCTCGGGAAGCAGCTGTGGAAGCCCTAACTCTGCAGATACATCTAGTGACTTTAAGGACCTTTGGACAAAACTAAAAGAATGTCATGATAGAGAAGTACAAGGTTTACAAGTAAAAGTAACCAAGCTAAAACAGGAACGAATCTTAGATGCACAAAGACTAGAAGAATTCTTCACCAAAAATCAACAGCTGAGGGAACAGCAGAAAGTCCTTCATGAAACCATTAAAGTTTTAGAAGATCGGTTAAGAGCAGGCTTATGTGATCGCTGTGCAGTAACTGAAGAACATATGCGGAAAAAACAGCAAGAGTTTGAAAATATCCGGCAGCAGAATCTTAAACTTATTACAGAACTTATGAATGAAAGGAATACTCTACAGGAAGAAAATAAAAAG…	1	500	4	1500	1497	Human
PRKDC_2000_2500_pDONR221	ATGAAGAAAAAGTACATTGAAATTAGGAAAGAAGCCAGAGAAGCAGCAAATGGGGATTCAGATGGTCCTTCCTATATGTCTTCCCTGTCATATTTGGCAGACAGTACCCTGAGTGAGGAAATGAGTCAATTTGATTTCTCAACCGGAGTTCAGAGCTATTCATACAGCTCCCAAGACCCTAGACCTGCCACTGGTCGTTTTCGGAGACGGGAGCAGCGGGACCCCACGGTGCATGATGATGTGCTGGAGCTGGAGATGGACGAGCTCAATCGGCATGAGTGCATGGCGCCCCTGACGGCCCTGGTCAAGCACATGCACAGAAGCCTGGGCCCGCCTCAAGGAGAAGAGGATTCAGTGCCAAGAGATCTTCCTTCTTGGATGAAATTCCTCCATGGCAAA…	2000	2500	6001	7500	1500	Human
PARP1_1400_pDONR221	ATGGCGGAGTCTTCGGATAAGCTCTATCGAGTCGAGTACGCCAAGAGCGGGCGCGCCTCTTGCAAGAAATGCAGCGAGAGCATCCCCAAGGACTCGCTCCGGATGGCCATCATGGTGCAGTCGCCCATGTTTGATGGAAAAGTCCCACACTGGTACCACTTCTCCTGCTTCTGGAAGGTGGGCCACTCCATCCGGCACCCTGACGTTGAGGTGGATGGGTTCTCTGAGCTTCGGTGGGATGACCAGCAGAAAGTCAAGAAGACAGCGGAAGCTGGAGGAGTGACAGGCAAAGGCCAGGATGGAATTGGTAGCAAGGCAGAGAAGACTCTGGGTGACTTTGCAGCAGAGTATGCCAAGTCCAACAGAAGTACGTGCAAGGGGTGTATGGAGAAGATAGAA…	1	400	4	1200	1197	Human
NBN_200754_pDONR221	ATGGATGAACCATCTATTGGAAGTAAAAATGTTGATCTGTCAGGACGGCAGGAAAGAAAACAAATCTTCAAAGGGAAAACATTTATATTTTTGAATGCCAAACAGCATAAGAAATTGAGTTCCGCAGTTGTCTTTGGAGGTGGGGAAGCTAGGTTGATAACAGAAGAGAATGAAGAAGAACATAATTTCTTTTTGGCTCCGGGAACGTGTGTTGTTGATACAGGAATAACAAACTCACAGACCTTAATTCCTGACTGTCAGAAGAAATGGATTCAGTCAATAATGGATATGCTCCAAAGGCAAGGTCTTAGACCTATTCCTGAAGCAGAAATTGGATTGGCGGTGATTTTCATGACTACAAAGAATTACTGTGATCCTCAGGGCCATCCCAGTACAGGA…	200	754	601	2262	1662	Human
MSH3_1500_pDONR221	ATGTCTCGCCGGAAGCCTGCGTCGGGCGGCCTCGCTGCCTCCAGCTCAGCCCCTGCGAGGCAAGCGGTTTTGAGCCGATTCTTCCAGTCTACGGGAAGCCTGAAATCCACCTCCTCCTCCACAGGTGCAGCCGACCAGGTGGACCCTGGCGCTGCAGCGGCTGCAGCGGCCGCAGCGGCCGCAGCGCCCCCAGCGCCCCCAGCTCCCGCCTTCCCGCCCCAGCTGCCGCCGCACATAGCTACAGAAATTGACAGAAGAAAGAAGAGACCATTGGAAAATGATGGGCCTGTTAAAAAGAAAGTAAAGAAAGTCCAACAAAAGGAAGGAGGAAGTGATCTGGGAATGTCTGGCAACTCTGAGCCAAAGAAATGTCTGAGGACCAGGAATGTTTCAAAGTCT…	1	500	4	1500	1497	Human
XPC_400940_pDONR221	ATGGAAGATGAGGGCCCAGGAGACAAGCAGGAGAAGGCAACCCAGCGACGTCCGCATGGCCGGGAGCGGCGGGTGGCCTCCAGGGTGTCTTATAAAGAGGAGAGTGGGAGTGATGAGGCTGGCAGCGGCTCTGATTTTGAGCTCTCCAGTGGAGAAGCCTCTGATCCCTCTGATGAGGATTCCGAACCTGGCCCTCCAAAGCAGAGGAAAGCCCCCGCTCCTCAGAGGACAAAGGCTGGGTCCAAGAGTGCCTCCAGGACCCATCGTGGGAGCCATCGTAAGGACCCAAGCTTGCCAGCGGCATCCTCAAGCTCTTCAAGCAGTAAAAGAGGCAAGAAAATGTGCAGCGATGGTGAGAAGGCAGAAAAAAGAAGCATAGCTGGTATAGACCAGTGGCTA…	400	940	1201	2820	1620	Human
USP7_50550_pDONR221	ATGGGACACAACACCGCGGAGGAGGACATGGAGGATGACACCAGTTGGCGCTCCGAGGCAACCTTTCAGTTCACTGTGGAGCGCTTCAGCAGACTGAGTGAGTCGGTCCTTAGCCCTCCGTGTTTTGTGCGAAATCTGCCATGGAAGATTATGGTGATGCCACGCTTTTATCCAGACAGACCACACCAAAAAAGCGTAGGATTCTTTCTCCAGTGCAATGCTGAATCTGATTCCACGTCATGGTCTTGCCATGCACAAGCAGTGCTGAAGATAATAAATTACAGAGATGATGAAAAGTCGTTCAGTCGTCGTATTAGTCATTTGTTCTTCCATAAAGAAAATGATTGGGGATTTTCCAATTTTATGGCCTGGAGTGAAGTGACCGATCCTGAGAAAGGA…	50	550	151	1650	1500	Human
SPIDR_300800_pDONR221	ATGGTGAAAATTTTAGAGCTGCATGAGGAATGTGCCATGCAAGTTGCCATGTGTGAGCAGTTATTGGGGTCACCAGCCACCAGCTCCTCCCAAAGTGTGGCTCCCAGGCCTGGAGCTGGCCTGAAAGTTCTCTTCACCAAGGAGACTGCAGGCTACCTCAGGGGCCGTCCCCAGGACACTGTCCGGATCTTCCCTCCCTGGCAAAAACTGATTATTCCAAGTGGAAGTTGCCCTGTTATTCTGAATACTTACTTTTGTGAGAAAGTTGTTGCCAAAGAAGATTCAGAAAAAACTTGTGAAGTGTACTGTCCGGACATACCCCTTCCAAGAAGAAGCATCTCTTTGGCCCAGATGTTTGTAATTAAGGGTCTAACAAATAATTCACCTGAAATCCAGGTT…	300	800	901	2400	1500	Human
SMC5_1500_pDONR221	ATGGCGACTCCGAGCAAGAAGACGTCAACTCCAAGCCCCCAGCCTTCCAAGAGAGCTCTCCCGAGAGACCCTTCGTCGGAGGTCCCGAGCAAGAGGAAGAATTCGGCCCCGCAGCTGCCGCTGTTGCAGTCGTCCGGGCCTTTCGTGGAAGGCTCTATCGTCCGCATCTCGATGGAGAACTTCCTAACATATGATATTTGTGAAGTATCTCCTGGACCCCACTTGAATATGATCGTTGGAGCCAATGGAACAGGGAAGTCGAGCATTGTGTGTGCCATTTGCCTTGGTTTAGCTGGAAAACCTGCTTTCATGGGACGAGCAGATAAGGTTGGGTTTTTTGTGAAGAGAGGATGTTCTAGAGGCATGGTTGAAATTGAATTGTTCAGGGCTTCTGGAAAT…	1	500	4	1500	1497	Human
SETD2_500_1000_pDONR221	ATGTACTTAGAGATGGAAAGAAGAGGCAAGTATTCTTCAAAACTAGAAAGAGAATCTAAAAGGACTTCAGAAAATGAAGCAATTAAAAGATGTTGTTCTCCCCCTAATGAACTGGGATTCCGACGAGGGTCATCATATTCTAAGCATGACAGTAGTGCTTCCCGTTATAAATCTACCCTTTCAAAACCTATACCCAAGTCTGATAAATTTAAAAATTCTTTCTGTTGTACAGAATTAAATGAAGAAATCAAACAGTCTCATTCTTTTAGTTTACAGACACCTTGTTCAAAAGGTAGTGAATTAAGAATGATTAATAAAAATCCTGAAAGAGAAAAGGCTGGGTCTCCAGCTCCATCAAATCGATTAAATGATTCACCTACTTTAAAAAAGCTAGATGAA…	500	1000	1501	3000	1500	Human
RAD54L_1500_pDONR221	ATGAGGAGGAGCTTGGCTCCCAGCCAGCTGGCCAAGAGAAAACCTGAAGGCAGGTCCTGTGATGATGAAGACTGGCAACCTGGCCTAGTGACTCCTAGGAAACGGAAATCCAGCAGTGAGACCCAGATCCAGGAGTGTTTCCTGTCTCCTTTTCGGAAACCTTTGAGTCAGCTAACCAATCAACCACCTTGTCTGGACAGCAGTCAGCATGAAGCATTTATTCGAAGCATTTTGTCAAAGCCTTTCAAAGTCCCCATTCCAAATTATCAAGGTCCTCTGGGCTCTCGAGCATTGGGCCTGAAAAGGGCTGGGGTCCGCCGGGCCCTCCATGACCCCCTGGAAAAAGATGCCTTGGTTCTGTATGAGCCTCCCCCGCTGAGCGCTCATGACCAGCTGAAG…	1	500	4	1500	1497	Human
POLN_200800_pDONR221	ATGAGGCATTTGGATGATTGGGCAAAAAGCCAGCTGATTGAAATGCTCAAACAGGCAGCAGCCCTGGTGATAACTGTGATGTATACTGATGGTTCCACCCAGCTAGGAGCTGACCAGACCCCCGTTTCTTCTGTTAGAGGAATTGTGGTGTTAGTAAAACGCCAAGCAGAGGGTGGCCATGGCTGTCCAGATGCCCCGGCCTGTGGTCCTGTTCTGGAGGGCTTTGTGTCAGATGATCCATGCATCTACATTCAAATAGAGCACTCTGCTATCTGGGACCAAGAACAGGAGGCACATCAACAATTTGCCCGGAACGTGCTATTTCAAACAATGAAATGTAAATGTCCTGTTATTTGTTTTAATGCTAAGGATTTTGTGAGAATAGTGCTGCAGTTTTTT…	200	800	601	2400	1800	Human
PARP1_4001015_pDONR221	ATGCTGTCCCGGAACAAGGATGAAGTGAAGGCCATGATTGAGAAACTCGGGGGGAAGTTGACGGGGACGGCCAACAAGGCTTCCCTGTGCATCAGCACCAAAAAGGAGGTGGAAAAGATGAATAAGAAGATGGAGGAAGTAAAGGAAGCCAACATCCGAGTTGTGTCTGAGGACTTCCTCCAGGACGTCTCCGCCTCCACCAAGAGCCTTCAGGAGTTGTTCTTAGCGCACATCTTGTCCCCTTGGGGGGCAGAGGTGAAGGCAGAGCCTGTTGAAGTTGTGGCCCCAAGAGGGAAGTCAGGGGCTGCGCTCTCCAAAAAAAGCAAGGGCCAGGTCAAGGAGGAAGGTATCAACAAATCTGAAAAGAGAATGAAATTAACTCTTAAAGGAGGAGCAGCT…	400	1015	1201	3045	1845	Human
MTOR_1500_2000_pDONR221	ATGTGGACCCTGGTTAATGATGAGACCCAAGCCAAGATGGCCCGGATGGCTGCTGCAGCTGCATGGGGTTTAGGTCAGTGGGACAGCATGGAAGAATACACCTGTATGATCCCTCGGGACACCCATGATGGGGCATTTTATAGAGCTGTGCTGGCACTGCATCAGGACCTCTTCTCCTTGGCACAACAGTGCATTGACAAGGCCAGGGACCTGCTGGATGCTGAATTAACTGCGATGGCAGGAGAGAGTTACAGTCGGGCATATGGGGCCATGGTTTCTTGCCACATGCTGTCCGAGCTGGAGGAGGTTATCCAGTACAAACTTGTCCCCGAGCGACGAGAGATCATCCGCCAGATCTGGTGGGAGAGACTGCAGGGCTGCCAGCGTATCGTAGAGGAC…	1500	2000	4501	6000	1500	Human
MSH2_1500_pDONR221	ATGGCGGTGCAGCCGAAGGAGACGCTGCAGTTGGAGAGCGCGGCCGAGGTCGGCTTCGTGCGCTTCTTTCAGGGCATGCCGGAGAAGCCGACCACCACAGTGCGCCTTTTCGACCGGGGCGACTTCTATACGGCGCACGGCGAGGACGCGCTGCTGGCCGCCCGGGAGGTGTTCAAGACCCAGGGGGTGATCAAGTACATGGGGCCGGCAGGAGCAAAGAATCTGCAGAGTGTTGTGCTTAGTAAAATGAATTTTGAATCTTTTGTAAAAGATCTTCTTCTGGTTCGTCAGTATAGAGTTGAAGTTTATAAGAATAGAGCTGGAAATAAGGCATCCAAGGAGAATGATTGGTATTTGGCATATAAGGCTTCTCCTGGCAATCTCTCTCAGTTTGAAGAC…	1	500	4	1500	1497	Human
XAB2_1500_pDONR221	ATGGTGGTGATGGCGCGACTCTCGCGGCCCGAGCGGCCGGACCTTGTCTTCGAGGAAGAGGACCTCCCCTATGAGGAGGAAATCATGCGGAACCAATTCTCTGTCAAATGCTGGCTTCGCTACATCGAGTTCAAACAGGGCGCCCCGAAGCCCAGGCTCAATCAGCTATACGAGCGGGCACTCAAGCTGCTGCCCTGCAGCTACAAACTCTGGTACCGATACCTGAAGGCGCGTCGGGCACAGGTGAAGCATCGCTGTGTGACCGACCCTGCCTATGAAGATGTCAACAACTGTCATGAGAGGGCCTTTGTGTTCATGCACAAGATGCCTCGTCTGTGGCTAGATTACTGCCAGTTCCTCATGGACCAGGGGCGCGTCACACACACCCGCCGCACCTTC…	1	500	4	1500	1497	Human
USP47_600_1000_pDONR221	ATGGAAATTGAGCGCAATACATGCAAGATAAAATTATTCTGTTTGCATCCTACAAAACAAGTAATGATGGAAAATAAATTGGAGGTTCATAAGGATAAGACATTAAAGGAAGCAGTAGAAATGGCTTATAAGATGATGGATTTAGAAGAGGTAATACCCCTGGATTGCTGTCGCCTTGTTAAATATGATGAGTTTCATGATTATCTAGAACGGTCATATGAAGGAGAAGAAGATACACCAATGGGGCTTCTACTAGGTGGCGTCAAGTCAACATATATGTTTGATCTGCTGTTGGAGACGAGAAAGCCTGATCAGGTTTTCCAATCTTATAAACCTGGAGAAGTGATGGTGAAAGTTCATGTTGTTGATCTAAAGGCAGAATCTGTAGCTGCTCCTATA…	600	1000	1801	3000	1200	Human
SPIDR_200600_pDONR221	ATGGATTCAGAATCCCCTCACAAATACCACGTGCAGTTTGCATCGGATGCAAGACAGATTATGGAGAGACTGATAGATCCAAGGACAAAATCAACAGAGACCATTTTGCATACACCTCAGAAACCCACAGCTAAGTTTCCCAGGACTCCAGAAAATTCAGCAAAGAAGAAGCTTTTAAGAGGTGGACTAGCAGAAAGACTAAATGGACTGCAGAATCGAGAGAGATCTGCTATTTCTTTGTGGAGACATCAATGTATTTCTTACCAAAAGACACTTTCAGGTAGAAAATCTGGTGTATTAACTGTGAAAATTTTAGAGCTGCATGAGGAATGTGCCATGCAAGTTGCCATGTGTGAGCAGTTATTGGGGTCACCAGCCACCAGCTCCTCCCAAAGTGTG…	200	600	601	1800	1200	Human
SMC5_5001102_pDONR221	ATGGAAAATCATATTCCATCAAATGACTTAAGAGCCTTTGTATTTGAAAGTCAAGAAGATATGGAGGTTTTCCTCAAAGAGGTTCGTGACAATAAAAAATTAAGAGTAAATGCTGTTATTGCTCCCAAGAGTTCATATGCAGACAAAGCACCTTCAAGATCTTTGAATGAACTTAAACAATACGGATTTTTCTCTTATTTGAGAGAATTATTTGATGCACCTGATCCTGTAATGAGTTACCTTTGCTGTCAGTATCATATTCATGAAGTTCCTGTAGGAACTGAAAAGACCAGAGAAAGAATTGAACGGGTAATACAAGAAACCCGATTAAAACAGATTTATACAGCAGAAGAAAAGTATGTGGTGAAAACTTCTTTTTATTCAAACAAAGTTATTTCT…	500	1102	1501	3306	1806	Human
SETD2_1_500_pDONR221	ATGAAGCAGCTGCAGCCGCAGCCGCCTCCGAAGATGGGGGATTTCTACGACCCGGAGCACCCGACCCCTGAAGAAGAAGAAAATGAGGCAAAGATTGAAAATGTGCAGAAAACAGGTTTCATCAAAGGACCAATGTTCAAAGGTGTTGCTTCTAGTCGATTTTTGCCCAAAGGCACCAAAACAAAAGTTAATTTGGAAGAACAGGGACGACAGAAGGTGTCATTCAGCTTCAGCCTTACAAAGAAAACTTTGCAGAATAGGTTTCTCACTGCACTTGGCAATGAAAAGCAAAGTGATACTCCAAACCCTCCAGCTGTACCTCTTCAGGTAGACTCGACTCCTAAAATGAAAATGGAAATTGGTGATACCTTATCTACTGCAGAAGAATCTTCCCCACCA…	1	500	4	1500	1497	Human
RAD54L_150700_pDONR221	ATGAAGGTTTTGCGGCCTCATCAGAGAGAGGGAGTGAAATTCCTGTGGGAGTGTGTCACCAGTCGGCGCATCCCTGGCAGCCATGGCTGCATCATGGCTGATGAGATGGGCCTAGGAAAGACGCTGCAGTGCATCACATTGATGTGGACACTTTTACGCCAGAGTCCAGAGTGCAAGCCAGAAATTGACAAGGCAGTGGTGGTGTCGCCTTCCAGCCTGGTGAAGAACTGGTACAATGAGGTTGGGAAATGGCTCGGAGGGAGGATCCAACCTCTGGCCATCGATGGAGGATCTAAGGATGAAATAGACCAAAAGCTGGAAGGATTCATGAACCAGCGTGGAGCCAGGGTGTCTTCTCCCATCCTCATCATTTCCTATGAGACCTTCCGCCTTCATGTT…	150	700	451	2100	1650	Human
POLK_200871_pDONR221	ATGTACTTGAATATAACAAAGCACTTAGAAGAAAGACAAAATTGGCCTGAGGATAAAAGAAGGTATTTCATCAAAATGGGAAGCTCTGTAGAAAATGATAATCCAGGAAAGGAAGTTAATAAACTGAGTGAGCATGAACGATCCATCTCTCCACTACTTTTTGAAGAGAGTCCTTCTGATGTGCAGCCCCCAGGAGATCCTTTCCAAGTGAACTTTGAAGAACAAAACAATCCTCAAATACTCCAAAACTCAGTTGTTTTTGGAACATCAGCCCAGGAAGTGGTAAAGGAAATTCGTTTCAGAATTGAGCAGAAAACAACACTGACAGCCAGTGCAGGCATTGCCCCAAATACAATGTTAGCAAAAGTATGCAGTGATAAGAATAAACCAAATGGACAA…	200	871	601	2613	2013	Human
PAN3_300888_pDONR221	ATGTCCAGGCTGAGTAACGTGTCCCAGTCAAATATGTCTGCCTTCTCTCAAGTTTTCTCTCACCCATCCATGGGAAGCCCTGCTACTGCTGGATTAGCGCCAGGAATGTCGTTGTCTGCTGGGTCTTCCCCTCTTCATTCCCCCAAGATTACTCCACATACTTCTCCTGCTCCCAGAAGAAGAAGTCACACTCCAAATCCAGCAAGTTACATGGTGCCTTCTAGTGCCTCTACATCTGTTAATAATCCTGTTTCTCAGACTCCGTCTTCTGGTCAGGTGATCCAAAAGGAAACTGTTGGTGGGACGACTTACTTCTATACAGACACAACTCCAGCACCTTTGACTGGAATGGTGTTTCCAAACTATCATATTTATCCTCCAACTGCACCTCACGTTGCT…	300	888	901	2664	1764	Human
MTOR_2000_2500_pDONR221	ATGCACAGCAACACCCTGGTCCAGCAGGCCATGATGGTGAGCGAGGAGCTGATCCGAGTGGCCATCCTCTGGCATGAGATGTGGCATGAAGGCCTGGAAGAGGCATCTCGTTTGTACTTTGGGGAAAGGAACGTGAAAGGCATGTTTGAGGTGCTGGAGCCCTTGCATGCTATGATGGAACGGGGCCCCCAGACTCTGAAGGAAACATCCTTTAATCAGGCCTATGGTCGAGATTTAATGGAGGCCCAAGAGTGGTGCAGGAAGTACATGAAATCAGGGAATGTCAAGGACCTCACCCAAGCCTGGGACCTCTATTATCATGTGTTCCGACGAATCTCAAAGCAGCTGCCTCAGCTCACATCCTTAGAGCTGCAATATGTTTCCCCAAAACTTCTGATG…	2000	2500	6001	7500	1500	Human
MSH2_300934_pDONR221	ATGAAATTGGATATTGCAGCAGTCAGAGCCCTTAACCTTTTTCAGGGTTCTGTTGAAGATACCACTGGCTCTCAGTCTCTGGCTGCCTTGCTGAATAAGTGTAAAACCCCTCAAGGACAAAGACTTGTTAACCAGTGGATTAAGCAGCCTCTCATGGATAAGAACAGAATAGAGGAGAGATTGAATTTAGTGGAAGCTTTTGTAGAAGATGCAGAATTGAGGCAGACTTTACAAGAAGATTTACTTCGTCGATTCCCAGATCTTAACCGACTTGCCAAGAAGTTTCAAAGACAAGCAGCAAACTTACAAGATTGTTACCGACTCTATCAGGGTATAAATCAACTACCTAATGTTATACAGGCTCTGGAAAAACATGAAGGAAAACACCAGAAATTATTG…	300	934	901	2802	1902	Human
XAB2_300856_pDONR221	ATGCAGTTCGAGGAGAGCATGATCGCTGCAAAGATGGAGACCGCCTCGGAGCTGGGGCGCGAGGAGGAGGATGATGTGGACCTGGAGCTGCGCCTGGCCCGCTTCGAGCAGCTCATCAGCCGGCGGCCCCTGCTCCTCAACAGCGTCTTGCTGCGCCAAAACCCACACCACGTGCACGAGTGGCACAAGCGTGTCGCCCTGCACCAGGGCCGCCCCCGGGAGATCATCAACACCTACACAGAGGCTGTGCAGACGGTGGACCCCTTCAAGGCCACAGGCAAGCCCCACACTCTGTGGGTGGCGTTTGCCAAGTTTTATGAGGACAACGGACAGCTGGACGATGCCCGTGTCATCCTGGAGAAGGCCACCAAGGTGAACTTCAAGCAGGTGGATGACCTG…	300	856	901	2568	1668	Human
USP47_600_1300_pDONR221	ATGGAAATTGAGCGCAATACATGCAAGATAAAATTATTCTGTTTGCATCCTACAAAACAAGTAATGATGGAAAATAAATTGGAGGTTCATAAGGATAAGACATTAAAGGAAGCAGTAGAAATGGCTTATAAGATGATGGATTTAGAAGAGGTAATACCCCTGGATTGCTGTCGCCTTGTTAAATATGATGAGTTTCATGATTATCTAGAACGGTCATATGAAGGAGAAGAAGATACACCAATGGGGCTTCTACTAGGTGGCGTCAAGTCAACATATATGTTTGATCTGCTGTTGGAGACGAGAAAGCCTGATCAGGTTTTCCAATCTTATAAACCTGGAGAAGTGATGGTGAAAGTTCATGTTGTTGATCTAAAGGCAGAATCTGTAGCTGCTCCTATA…	600	1300	1801	3900	2100	Human
SPIDR_1500_pDONR221	ATGCCCCGCGGCAGCCGCGCTCGGGGCTCTAAGAGAAAAAGGAGTTGGAATACAGAATGCCCATCCTTTCCAGGAGAAAGACCACTGCAGGTCAGAAGAGCAGGTCTCAGGACAGCAGGGGCAGCTGCCTCTCTCTCTGAAGCATGGCTCAGGTGTGGAGAAGGGTTTCAGAACACTTCTGGGAATCCGTCATTAACAGCTGAAGAGAAGACGATTACAGAAAAGCACCTTGAATTATGCCCTAGACCCAAGCAAGAAACCACCACATCTAAAAGCACCAGTGGGCTTACAGACATAACATGGAGCTCCAGTGGAAGTGATTTGTCGGATGAAGATAAGACACTTTCTCAGTTACAGAGAGATGAATTACAGTTTATCGACTGGGAGATTGACAGTGAC…	1	500	4	1500	1497	Human
SLX4_600_1000_pDONR221	ATGTCGCCTTCGGCCAGCCAGAGGGAGCACCAGGCCCTGCAGGACCTCGTGGACCTGGCGAGGGAGGGACTGAGCGCCAGCCCGTGGCCCGGCAGTGGGGGCCTGGCTGGCTCGGAAGGGACTGCAGGGTTGGACGTGGTGCCCGGCGGCCTTCCTCTGACTGGGTTTGTGGTGCCATCGCAGGACAAGCACCCGGACAGGGGCGGCCGCACCTTGCTCTCCCTCGGGCTGCTGGTTGCTGACTTTGGCGCCATGGTCAATAACCCACACCTGAGTGATGTCCAGTTTCAGACGGACAGCGGGGAGGTGCTTTACGCCCACAAGTTCGTGCTTTATGCCCGATGCCCGCTCCTCATCCAGTATGTGAACAATGAAGGCTTCTCCGCTGTAGAGGACGGG…	600	1000	1801	3000	1200	Human
SETD2_2000_2500_pDONR221	ATGAAAACAGTGGATATAAGTGATTTGGCCACCAAACTCCTGGACAGTTGGAAAGACCTAAAGGAGGTATATCGAATTCCAAAGAAAAGTCAAACTGAAAAGGAAAACACAACAACTGAACGAGGAAGGGATGCTGTTGGCTTCAGAGATCAAACACCTGCCCCGAAGACTCCTAATAGGTCAAGAGAGAGAGACCCAGACAAGCAAACTCAAAATAAAGAGAAAAGGAAACGAAGAAGCTCCCTCTCACCACCCTCTTCTGCCTATGAGCGGGGAACAAAAAGGCCAGATGACAGATATGATACACCAACTTCTAAAAAGAAAGTACGAATTAAAGACCGCAATAAACTTTCTACAGAGGAACGCCGGAAGTTGTTTGAGCAAGAGGTGGCTCAACGG…	2000	2500	6001	7500	1500	Human
RAD50_900_1300_pDONR221	ATGTTGTACAGAGAGATAAAGGATGCTAAAGAGCAGGTAAGCCCTTTGGAAACAACATTGGAAAAGTTCCAGCAAGAAAAAGAAGAATTAATCAACAAAAAAAATACAAGCAACAAAATAGCACAGGATAAACTGAATGATATTAAAGAGAAGGTTAAAAATATTCATGGCTATATGAAAGACATTGAGAATTATATTCAAGATGGGAAAGACGACTATAAGAAGCAAAAAGAAACTGAACTTAATAAAGTAATAGCTCAACTAAGTGAATGCGAGAAACACAAAGAAAAGATAAATGAAGATATGAGACTCATGAGACAAGATATTGATACACAGAAGATACAAGAAAGGTGGCTACAAGATAACCTTACTTTAAGAAAAAGAAATGAGGAACTAAAA…	900	1300	2701	3900	1200	Human
POLK_1500_pDONR221	ATGGATAGCACAAAGGAGAAGTGTGACAGTTACAAAGATGATCTTCTGCTTAGGATGGGACTTAATGATAATAAAGCAGGAATGGAAGGATTAGATAAAGAGAAAATTAACAAAATTATAATGGAAGCCACGAAGGGGTCCAGATTTTATGGAAATGAGCTCAAGAAAGAAAAGCAAGTCAACCAACGAATTGAAAATATGATGCAACAAAAAGCTCAAATCACCAGCCAACAGCTAAGAAAAGCACAATTACAGGTTGACAGATTTGCAATGGAATTAGAACAAAGCCGAAATTTGAGCAATACCATAGTGCACATTGACATGGATGCTTTCTATGCAGCTGTAGAAATGAGGGACAATCCAGAATTGAAGGATAAACCCATTGCTGTAGGATCAATG…	1	500	4	1500	1497	Human
PAN3_200600_pDONR221	ATGAAGCCATATTCAGCCCATGATCCTCTAACATCACCTGCTTCATCCTTGTTTAATGACTTTGGTGCCCTCAACATCTCTCAGAGACGAAAGCCAAGGAAGTATCGCCTGGGGATGCTGGAGGAGAGGCTAGTTCCGATGGGATCAAAGGCACGAAAAGCAAAGAACCCTATTGGCTGCCTTGCTGACAGGTGTAAATCAGGAGTACCCATCAATATGGTTTGGTGGAACAGAGTCACAGAAAACAATTTACAGACACCAAATCCTACTGCAAGCGAGTTTATTCCTAAAGGAGGATCAACCTCCAGGCTGAGTAACGTGTCCCAGTCAAATATGTCTGCCTTCTCTCAAGTTTTCTCTCACCCATCCATGGGAAGCCCTGCTACTGCTGGATTAGCG…	200	600	601	1800	1200	Human
MTOR_1000_1500_pDONR221	ATGATTCGAGTCTGTGATGGGGCCATCCGGGAATTTTTGTTCCAGCAGCTGGGAATGTTGGTGTCCTTTGTGAAGAGCCACATCAGACCTTATATGGATGAAATAGTCACCCTCATGAGAGAATTCTGGGTCATGAACACCTCAATTCAGAGCACGATCATTCTTCTCATTGAGCAAATTGTGGTAGCTCTTGGGGGTGAATTTAAGCTCTACCTGCCCCAGCTGATCCCACACATGCTGCGTGTCTTCATGCATGACAACAGCCCAGGCCGCATTGTCTCTATCAAGTTACTGGCTGCAATCCAGCTGTTTGGCGCCAACCTGGATGACTACCTGCATTTACTGCTGCCTCCTATTGTTAAGTTGTTTGATGCCCCTGAAGCTCCACTGCCATCTCGA…	1000	1500	3001	4500	1500	Human
MRE11A_1500_pDONR221	ATGAACAGAAATATTAGTCATCAAAAAGGTGATGATGAAAACACATTTAAAATATTAGTTGCAACAGATATTCATCTTGGATTTATGGAGAAAGATGCAGTCAGAGGAAATGATACGTTTGTAACACTCGATGAAATTTTAAGACTTGCCCAGGAAAATGAAGTGGATTTTATTTTGTTAGGTGGTGATCTTTTTCATGAAAATAAGCCCTCAAGGAAAACATTACATACCTGCCTCGAGTTATTAAGAAAATATTGTATGGGTGATCGGCCTGTCCAGTTTGAAATTCTCAGTGATCAGTCAGTCAACTTTGGTTTTAGTAAGTTTCCATGGGTGAACTATCAAGATGGCAACCTCAACATTTCAATTCCAGTGTTTAGTATTCATGGCAATCATGAC…	1	500	4	1500	1497	Human
MRE11A_300708_pDONR221	ATGAAAATTCCTCTTCACACAGTGCGGCAGTTTTTCATGGAGGATATTGTTCTAGCTAATCATCCAGACATTTTTAACCCAGATAATCCTAAAGTAACCCAAGCCATACAAAGCTTCTGTTTGGAGAAGATTGAAGAAATGCTTGAAAATGCTGAACGGGAACGTCTGGGTAATTCTCACCAGCCAGAGAAGCCTCTTGTACGACTGCGAGTGGACTATAGTGGAGGTTTTGAACCTTTCAGTGTTCTTCGCTTTAGCCAGAAATTTGTGGATCGGGTAGCTAATCCAAAAGACATTATCCATTTTTTCAGGCATAGAGAACAAAAGGAAAAAACAGGAGAAGAGATCAACTTTGGGAAACTTATCACAAAGCCTTCAGAAGGAACAACTTTAAGGGTA…	300	708	901	2124	1224	Human
MLH1_200756_pDONR221	ATGGTAGCTGATGTTAGGACACTACCCAATGCCTCAACCGTGGACAATATTCGCTCCATCTTTGGAAATGCTGTTAGTCGAGAACTGATAGAAATTGGATGTGAGGATAAAACCCTAGCCTTCAAAATGAATGGTTACATATCCAATGCAAACTACTCAGTGAAGAAGTGCATCTTCTTACTCTTCATCAACCATCGTCTGGTAGAATCAACTTCCTTGAGAAAAGCCATAGAAACAGTGTATGCAGCCTATTTGCCCAAAAACACACACCCATTCCTGTACCTCAGTTTAGAAATCAGTCCCCAGAATGTGGATGTTAATGTGCACCCCACAAAGCATGAAGTTCACTTCCTGCACGAGGAGAGCATCCTGGAGCGGGTGCAGCAGCACATCGAGAGC…	200	756	601	2268	1668	Human
LIG4_250920_pDONR221	ATGCCAGGAAAGGAGGGAGCTGCTGAGGGACCCCTGGATCCATCTGGTTACAATCCTGCCAAGAACAACTATCATCCCGTGGAAGATGCCTGCTGGAAACCGGGCCAGAAGGTTCCTTACCTGGCTGTGGCCCGGACGTTTGAGAAGATCGAGGAGGTGTCTGCTCGGCTCCGGATGGTGGAGACGCTGAGCAACTTGCTGCGCTCCGTGGTGGCCCTGTCGCCTCCAGACCTCCTCCCTGTCCTCTACCTCAGCCTCAACCACCTTGGGCCACCCCAGCAGGGCCTGGAGCTTGGCGTGGGTGATGGTGTCCTTCTCAAGGCAGTGGCCCAGGCCACAGGTCGGCAGCTGGAGTCCGTCCGGGCTGAGGCAGCCGAGAAAGGCGACGTGGGGCTGGTG…	250	920	751	2760	2010	Human
HUWE1_1500_2000_pDONR221	ATGCCCCTGACAACAAGTGACACAAAAACCGTGTCAGAGTGGATAAGTCAGATGGCCACACTGCCCCAGGCCTCCAATTTGGCTACTAGAATCTTGCTTTTAACGCTACTTTTTGAGGAGTTGAAGCTACCTTGTGCTTGGGTGGTTGAATCAAGTGGCATCCTTAATGTCCTAATCAAACTCTTGGAAGTGGTTCAGCCCTGCCTCCAGGCAGCCAAGGAGCAGAAGGAAGTCCAGACCCCAAAGTGGATCACACCAGTGTTGCTCCTGATTGATTTCTATGAAAAGACAGCCATCTCCTCAAAAAGGAGAGCCCAGATGACTAAGTACCTGCAATCCAACAGCAACAACTGGCGCTGGTTTGATGATCGCTCTGGGCGTTGGTGTAGTTACAGTGCA…	1500	2000	4501	6000	1500	Human
GEN1_300909_pDONR221	ATGCACCGTACAGAACATGATAGGCAACTCAGTGAAGTAGAGAACAATATTAAGAAGAAAGCTTGCTGTTGTGAGGGATTCCCATTCCATGAGGTTATTCAAGAATTCCTTTTAAACAAGGATAAATTGGTGAAGGTTATCAGGTACCAAAGACCTGATTTGTTATTGTTTCAGAGATTTACTCTTGAAAAAATGGAGTGGCCCAATCACTATGCATGTGAGAAATTGCTGGTACTTTTGACCCATTATGACATGATAGAAAGAAAGCTTGGTAGCAGAAACTCTAATCAACTACAGCCAATTCGAATTGTTAAGACTCGAATCAGAAATGGAGTTCATTGTTTTGAAATAGAATGGGAAAAGCCTGAACATTATGCTATGGAAGATAAACAACATGGA…	300	909	901	2727	1827	Human
EXOSC10_300886_pDONR221	ATGAACGAAAAGCTCTTGAATTGTCAGGAATTTGCAGTTGACTTGGAGCACCACTCTTACAGGAGCTTCCTGGGACTGACCTGCCTGATGCAAATTTCTACTCGGACGGAAGACTTCATCATTGACACCCTCGAGCTTCGAAGTGACATGTACATTCTCAATGAGAGCCTCACAGACCCAGCCATCGTTAAGGTCTTTCATGGTGCTGATTCAGACATAGAATGGCTACAGAAAGACTTTGGGTTGTATGTAGTAAACATGTTTGATACTCATCAGGCAGCACGCCTTCTTAACCTGGGCAGGCACTCACTCGATCATCTCCTGAAACTCTACTGCAACGTGGACTCAAACAAGCAATATCAGCTGGCTGATTGGAGAATACGCCCTCTGCCCGAGGAG…	300	886	901	2658	1758	Human
ERCC3_300783_pDONR221	ATGTCTGTCAACCCTGATATCAACATTGACCTAAAGCCCACAGCTGTCCTCAGACCCTATCAGGAGAAGAGCTTGCGAAAGATGTTTGGAAACGGGCGTGCACGTTCGGGGGTCATTGTTCTTCCCTGCGGTGCTGGAAAGTCCCTGGTTGGTGTGACTGCTGCATGCACTGTCAGAAAACGCTGTCTGGTGCTGGGCAACTCAGCTGTTTCTGTGGAGCAGTGGAAAGCCCAGTTCAAGATGTGGTCCACCATTGACGACAGCCAGATCTGCCGGTTCACCTCCGATGCCAAGGACAAGCCCATCGGCTGCTCCGTTGCCATTAGCACCTACTCCATGCTGGGCCACACCACCAAAAGGTCCTGGGAGGCCGAGCGAGTCATGGAGTGGCTCAAGACC…	300	783	901	2349	1449	Human
DDB1_1500_pDONR221	ATGTCGTACAACTACGTGGTAACGGCCCAGAAGCCCACCGCCGTGAACGGCTGCGTGACCGGACACTTTACTTCGGCCGAAGACTTAAACCTGTTGATTGCCAAAAACACGAGATTAGAGATCTATGTGGTCACCGCCGAGGGGCTTCGGCCCGTCAAAGAGGTGGGCATGTATGGGAAGATTGCGGTCATGGAGCTTTTCAGGCCCAAGGGGGAGAGCAAGGACCTGCTGTTTATCTTGACAGCGAAGTACAATGCCTGCATCCTGGAGTATAAACAGAGTGGCGAGAGCATTGACATCATTACGCGAGCCCATGGCAATGTCCAGGACCGCATTGGCCGCCCCTCAGAGACCGGCATTATTGGCATCATTGACCCTGAGTGCCGGATGATTGGCCTG…	1	500	4	1500	1497	Human
BRCA2_1_500_pDONR221	ATGCCTATTGGATCCAAAGAGAGGCCAACATTTTTTGAAATTTTTAAGACACGCTGCAACAAAGCAGATTTAGGACCAATAAGTCTTAATTGGTTTGAAGAACTTTCTTCAGAAGCTCCACCCTATAATTCTGAACCTGCAGAAGAATCTGAACATAAAAACAACAATTACGAACCAAACCTATTTAAAACTCCACAAAGGAAACCATCTTATAATCAGCTGGCTTCAACTCCAATAATATTCAAAGAGCAAGGGCTGACTCTGCCGCTGTACCAATCTCCTGTAAAAGAATTAGATAAATTCAAATTAGACTTAGGAAGGAATGTTCCCAATAGTAGACATAAAAGTCTTCGCACAGTGAAAACTAAAATGGATCAAGCAGATGATGTTTCCTGTCCA…	1	500	4	1500	1497	Human
BARD1_1500_pDONR221	ATGCCGGATAATCGGCAGCCGAGGAACCGGCAGCCGAGGATCCGCTCCGGGAACGAGCCTCGTTCCGCGCCCGCCATGGAACCGGATGGTCGCGGTGCCTGGGCCCACAGTCGCGCCGCGCTCGACCGCCTGGAGAAGCTGCTGCGCTGCTCGCGTTGTACTAACATTCTGAGAGAGCCTGTGTGTTTAGGAGGATGTGAGCACATCTTCTGTAGTAATTGTGTAAGTGACTGCATTGGAACTGGATGTCCAGTGTGTTACACCCCGGCCTGGATACAAGACTTGAAGATAAATAGACAACTGGACAGCATGATTCAACTTTGTAGTAAGCTTCGAAATTTGCTACATGACAATGAGCTGTCAGATTTGAAAGAAGATAAACCTAGGAAAAGTTTGTTT…	1	500	4	1500	1497	Human
MMS22L1_1600_pDONR221	ATGGAGAACTGTTCTGCTGCATCGACGTTCCTGACTGACAGCTTAGAGCTGGAGCTGGGGACGGAATGGTGCAAACCTCCTTACTTTTCTTGTGCTGTTGACAACAGAGGAGGAGGAAAACATTTTTCTGGAGAATCCTACCTCTGCAGCGGAGCCCTTAAGCGATTGATTTTGAATCTTGACCCTTTACCAACTAATTTTGAAGAAGATACCTTGGAAATATTTGGCATTCAGTGGGTTACTGAAACAGCATTAGTGAATTCATCTAGAGAACTCTTTCATTTATTCAGGCAACAACTGTACAACTTGGAAACCTTGTTACAGTCCAGTTGTGATTTTGGGAAGGTATCAACTCTACACTGCAAAGCAGACAATATTAGGCAGCAGTGTGTACTATTT…	1	600	4	1800	1797	Human
MDC1_1100_1700_pDONR221	ATGTTCCACCCAAAGCCTAAAATTAGAACTCGGAAGTCCTCCAGAATGACACCCTTTCCAGCTACCTCTGCTGCCCCTGAGCCCCACCCTTCCACCTCCACAGCCCAGCCAGTCACTCCCAAGCCCACATCTCAGGCCACTAGGAGCAGGACAAATAGGTCCTCTGTCAAGACCCCTGAACCAGTTGTCCCCACAGCCCCTGAGCTCCAGCCTTCCACCTCCACAGACCAGCCTGTCACCTCTGAGCCCACATCTCAGGTTACTAGGGGAAGAAAAAGTAGATCCTCTGTCAAGACCCCTGAAACAGTTGTGCCCACAGCCCTTGAGCTCCAGCCTTCCACCTCCACCGACCGACCTGTCACCTCTGAACCCACCTCTCAGGCTACTAGGGGAAGAAAA…	1100	1700	3301	5100	1800	Human
LIG4_300912_pDONR221	ATGCAGTTTGGTGCTTCTCCTACTGAAGGTTCTCTTACCCCATTCATTCATAATGCATTCAAAGCAGATATACAAATCTGTATTCTTGATGGTGAGATGATGGCCTATAATCCTAATACACAAACTTTCATGCAAAAGGGAACTAAGTTTGATATTAAAAGAATGGTAGAGGATTCTGATCTGCAAACTTGTTATTGTGTTTTTGATGTATTGATGGTTAATAATAAAAAGCTAGGGCATGAGACTCTGAGAAAGAGGTATGAGATTCTTAGTAGTATTTTTACACCAATTCCAGGTAGAATAGAAATAGTGCAGAAAACACAAGCTCATACTAAGAATGAAGTAATTGATGCATTGAATGAAGCAATAGATAAAAGAGAAGAGGGAATTATGGTAAAA…	300	912	901	2736	1836	Human
HUWE1_500_1000_pDONR221	ATGATTCCACAACGAGCAGCACTTCTGAAATCCATGTTGAATTTCCTCAAGAAGGCCATCCAAGACCCTGCTTTCTCAGATGGCATACGACATGTGATGGATGGTTCTCTGCCTACCTCCCTGAAACACATCATCAGCAATGCAGAATACTATGGCCCATCACTCTTCCTCCTAGCTACTGAAGTGGTGACTGTGTTTGTATTTCAAGAACCATCACTGCTCTCCTCACTCCAGGACAATGGATTGACAGATGTCATGCTGCATGCACTGCTTATCAAAGATGTTCCTGCTACCCGTGAAGTCCTTGGCTCCCTCCCAAATGTATTCAGTGCACTCTGTTTGAATGCCCGAGGTCTTCAGTCTTTTGTTCAGTGTCAGCCTTTTGAACGCCTCTTCAAA…	500	1000	1501	3000	1500	Human
FANCB_200600_pDONR221	ATGTCAAAATCAGATTATGCAATTTGGAATACCAAATTTTGTGTATATTCTCTTGAAAGTCAAGAAGTATTAAGTGATATATACATTATTCCTCCTGCTTACAGCAGTGTGGTGACTTATGTACATATTTGTGCAACTGAGATCATCAAAAACCAGTTAAGAATATCTCTCATTGCCCTTACTCGAAAGAATCAGCTGATTTCATTTCAGAATGGAACTCCTAAAAATGTGTGCCAGCTTCCATTTGGAGATCCTTGTGCAGTTCAACTTATGGATTCAGGTGGAGGAAACCTCTTTTTCGTTGTATCCTTTATATCCAATAATGCTTGTGCTGTATGGAAAGAGAGCTTTCAGGTTGCTGCTAAATGGGAAAAACTTAGCTTAGTACTGATAGATGAC…	200	600	601	1800	1200	Human
EXOSC10_200600_pDONR221	ATGAAAATCTTCATCAAACCCAATGCTCAGAAACCTCTCCCTCAAGCTCTCTCTAAGGAAAGGCGGGAACGCCCACAGGATCGTCCTGAGGACTTGGACGTCCCCCCTGCACTGGCTGATTTCATCCATCAGCAGAGAACCCAGCAGGTTGAGCAAGACATGTTTGCACATCCTTATCAATATGAACTAAATCACTTTACCCCAGCAGATGCAGTGCTTCAAAAGCCACAACCCCAGTTATACAGACCTATAGAAGAGACACCATGCCATTTCATATCCTCCCTGGATGAACTCGTGGAACTCAACGAAAAGCTCTTGAATTGTCAGGAATTTGCAGTTGACTTGGAGCACCACTCTTACAGGAGCTTCCTGGGACTGACCTGCCTGATGCAAATTTCT…	200	600	601	1800	1200	Human
ERCC3_1500_pDONR221	ATGGGCAAAAGAGACCGAGCGGACCGCGACAAGAAGAAATCCAGGAAGCGGCACTATGAGGATGAAGAGGATGATGAAGAGGACGCCCCGGGGAACGACCCTCAGGAAGCGGTTCCCTCGGCGGCGGGGAAGCAGGTGGATGAGTCAGGCACCAAAGTGGATGAATATGGAGCCAAGGACTACAGGCTGCAAATGCCGCTGAAGGACGACCACACCTCCAGGCCCCTCTGGGTGGCTCCCGATGGCCATATCTTCTTGGAAGCCTTCTCTCCAGTTTACAAATATGCCCAAGACTTCTTGGTGGCTATTGCAGAGCCAGTGTGCCGACCAACCCATGTGCATGAGTACAAACTAACTGCCTACTCCTTGTATGCAGCTGTCAGCGTTGGGCTGCAAACC…	1	500	4	1500	1497	Human
DCLRE1A_1500_pDONR221	ATGTTAGAAGACATTTCCGAAGAAGACATTTGGGAATACAAATCTAAAAGAAAACCAAAACGAGTTGATCCAAATAATGGCTCTAAAAATATTCTAAAATCTGTTGAAAAAGCAACAGATGGAAAATACCAGTCAAAACGGAGTAGAAACAGAAAAAGAGCCGCAGAAGCTAAAGAGGTGAAGGACCATGAAGTGCCCCTTGGAAATGCAGGTTGTCAGACTTCTGTTGCTTCTAGTCAGAATTCAAGTTGTGGAGATGGTATTCAGCAGACCCAAGACAAGGAAACTACTCCAGGAAAACTCTGTAGAACTCAAAAAAGCCAACACGTGTCCCCAAAGATACGTCCAGTTTATGATGGATACTGTCCAAATTGCCAGATGCCTTTTTCCTCATTGATA…	1	500	4	1500	1497	Human
BRCA2_500_1000_pDONR221	ATGATCAAAAAGTCTATATTCAGAATAAGAGAATCACCTAAAGAGACTTTCAATGCAAGTTTTTCAGGTCATATGACTGATCCAAACTTTAAAAAAGAAACTGAAGCCTCTGAAAGTGGACTGGAAATACATACTGTTTGCTCACAGAAGGAGGACTCCTTATGTCCAAATTTAATTGATAATGGAAGCTGGCCAGCCACCACCACACAGAATTCTGTAGCTTTGAAGAATGCAGGTTTAATATCCACTTTGAAAAAGAAAACAAATAAGTTTATTTATGCTATACATGATGAAACATCTTATAAAGGAAAAAAAATACCGAAAGACCAAAAATCAGAACTAATTAACTGTTCAGCCCAGTTTGAAGCAAATGCTTTTGAAGCACCACTTACATTTGCA…	500	1000	1501	3000	1500	Human
BARD1_400778_pDONR221	ATGAGTTCAAGTTACAGGCGAGTGATGTCTAGTCCCTCAGCAATGAAGCTGTTGCCCAATATGGCTGTGAAAAGAAATCATAGAGGAGAGACTTTGCTCCATATTGCTTCTATTAAGGGCGACATACCTTCTGTTGAATACCTTTTACAAAATGGAAGTGATCCAAATGTTAAAGACCATGCTGGATGGACACCATTGCATGAAGCTTGCAATCATGGGCACCTGAAGGTAGTGGAATTATTGCTCCAGCATAAGGCATTGGTGAACACCACCGGGTATCAAAATGACTCACCACTTCACGATGCAGCCAAGAATGGGCATGTGGATATAGTCAAGCTGTTACTTTCCTATGGAGCCTCCAGAAATGCTGTTAATATATTTGGTCTGCGGCCTGTCGAT…	400	778	1201	2334	1134	Human
MMS22L_6001200_pDONR221	ATGGAGAAAGCAAAGGAATTCTTGGTGTCTAAGAATGAGGAAATGGTACAGAGACAGACTATCTGGACCCTTCTTTCCATATACATTGATGGTGTTCAAGAAGTGTTTGAGACCAGCTATTGCTTGTATCCTTCCCATGAAAAACTGCTTAATGATGGATTTAGTATGCTTCTGCGAGCATGTCGAGAATCTGAACTTAGGACAGTATTGAGCTTCCTACAAGCTGTTCTGGCCAGAATCAGGAGTATGCATCAACAATTGTGTCAGGAACTTCAAAGGGACAATGTGGACCTATTTGTACAGTCTTCATTATCGGCTAAAGAGCGCCACCTTGCTGCAGTTGCCAGTGCACTGTGGAGACATTTCTTTTCATTTTTGAAGAGTCAGAGAATGTCACAG…	600	1200	1801	3600	1800	Human
MDC1_700_1100_pDONR221	ATGTGCTTTCTGGAGAATCAGGGCCTGGAAGCAGTCCAGAGCATGGAGGATGAACCTACCCAGGCCTTCATGTTGACTCCACCCCAAGAGCTTGGCCCTTCCCATTGCAGCTTCCAGACAACAGGTACCCTAGATGAACCATGGGAGGTCCTGGCTACACAGCCATTCTGTCTGAGAGAGTCTGAGGACTCTGAGACCCAGCCTTTTGACACGCACCTTGAGGCCTATGGACCTTGCCTGTCTCCACCTAGGGCAATACCAGGAGACCAACATCCAGAGAGCCCAGTTCACACAGAGCCAATGGGGATTCAAGGCAGAGGGAGGCAGACTGTGGATAAAGTCATGGGTATACCAAAAGAAACAGCAGAGAGGGTGGGCCCTGAGAGAGGGCCATTGGAG…	700	1100	2101	3300	1200	Human
LIG4_500920_pDONR221	ATGATGATCCTGAAGCAGACGTTCTGCGAGGTTCCCGACCTGGACCGAATTATCCCCGTGCTGCTGGAGCACGGCCTGGAACGTCTCCCGGAGCACTGCAAGCTGAGCCCAGGGATTCCCCTGAAACCAATGTTGGCCCATCCCACCCGGGGCATCAGCGAGGTCCTGAAACGCTTTGAGGAGGCAGCTTTCACCTGCGAATACAAATATGACGGGCAGAGGGCACAGATCCACGCCCTGGAAGGCGGGGAGGTGAAGATCTTCAGCAGGAATCAGGAAGACAACACTGGGAAGTACCCGGACATCATCAGCCGCATCCCCAAGATTAAACTCCCATCGGTCACATCCTTCATCCTGGACACCGAAGCCGTGGCTTGGGACCGGGAAAAGAAGCAGATC…	500	920	1501	2760	1260	Human
HUWE1_1000_1500_pDONR221	ATGATGGATGCTTCTACCCAGGGCTTATTAGAAGGCATTGGGCTAGATGGTGACACATTGGCTCCCATGGAGACAGATGAACCTACTGCTTCAGACTCTAAGGGCAAATCTAAAATCACACCAGCAATGGCTGCCAGAATTAAGCAAATCAAGCCTTTGTTATCAGCTTCCTCCAGATTAGGCCGAGCACTTGCTGAGCTATTTGGACTTCTTGTTAAACTTTGTGTGGGATCTCCTGTCCGCCAGAGAAGGAGCCATCATGCTGCCAGCACCACTACAGCACCGACACCTGCCGCGCGATCAACAGCCTCAGCTCTCACTAAGCTCTTGACTAAGGGGTTATCTTGGCAGCCCCCACCATATACACCTACTCCCCGATTCAGGCTGACATTCTTCATC…	1000	1500	3001	4500	1500	Human
FANCB_300860_pDONR221	ATGGTATCCTTTATATCCAATAATGCTTGTGCTGTATGGAAAGAGAGCTTTCAGGTTGCTGCTAAATGGGAAAAACTTAGCTTAGTACTGATAGATGACTTTATTGGAAGTGGAACTGAACAAGTACTCCTACTTTTTAAGGACTCCTTGAACTCAGACTGCCTGACTTCATTTAAAATAACGGATCTTGGAAAAATAAACTATTCGAGTGAACCATCAGATTGCAATGAAGATGACTTATTTGAAGACAAACAAGAGAATCGTTACCTGGTGGTTCCACCTCTAGAAACAGGACTGAAAGTTTGTTTTTCTTCTTTTCGGGAATTACGGCAGCATCTGTTGCTTAAGGAAAAAATTATTTCAAAATCTTACAAAGCTTTAATAAACCTAGTTCAAGGA…	300	860	901	2580	1680	Human
EXO1_300847_pDONR221	ATGTATGAAGATGATGTTGATCCTGAAACACTAAGCTACGCTGGGCAATATGTTGATGATTCCATAGCTCTTCAAATAGCACTTGGAAATAAAGATATAAATACTTTTGAACAGATCGATGACTACAATCCAGACACTGCTATGCCTGCCCATTCAAGAAGTCATAGTTGGGATGACAAAACATGTCAAAAGTCAGCTAATGTTAGCAGCATTTGGCATAGGAATTACTCTCCCAGACCAGAGTCGGGTACTGTTTCAGATGCCCCACAATTGAAGGAAAATCCAAGTACTGTGGGAGTGGAACGAGTGATTAGTACTAAAGGGTTAAATCTCCCAAGGAAATCATCCATTGTGAAAAGACCAAGAAGTGCAGAGCTGTCAGAAGATGACCTGTTGAGT…	300	847	901	2541	1641	Human
ERCC3_40700_pDONR221	ATGGCGGCGGGGAAGCAGGTGGATGAGTCAGGCACCAAAGTGGATGAATATGGAGCCAAGGACTACAGGCTGCAAATGCCGCTGAAGGACGACCACACCTCCAGGCCCCTCTGGGTGGCTCCCGATGGCCATATCTTCTTGGAAGCCTTCTCTCCAGTTTACAAATATGCCCAAGACTTCTTGGTGGCTATTGCAGAGCCAGTGTGCCGACCAACCCATGTGCATGAGTACAAACTAACTGCCTACTCCTTGTATGCAGCTGTCAGCGTTGGGCTGCAAACCAGTGACATCACCGAGTACCTCAGGAAGCTCAGCAAGACTGGAGTCCCTGATGGAATTATGCAGTTTATTAAGTTGTGTACTGTCAGCTATGGAAAAGTCAAGCTGGTCTTGAAGCAC…	40	700	121	2100	1980	Human
DCLRE1A_4001041_pDONR221	ATGGCATGTACTGGTGGTGATTTTGTGTTGTTTCCACCTGCATTGGCAGGGAAGCTTGCTGCTTCTGTTCATCAGGCAACTAAAGCAAAACCTGATGAGCCAGAATTTCACTCAGCTCAATCAAATAAACAGAAACAGGTAATTGAAGAATCATCTGTTTACAATCAAGTTTCTCTTCCGTTAGTTAAGAGTTTAATGTTGAAACCTTTTGAAAGTCAGGTAGAAGGGTATCTTTCTTCCCAACCAACCCAAAATACAATTAGAAAATTATCAAGTGAGAACTTGAATGCTAAGAATAATACTAACTCAGCATGTTTCTGCAGAAAGGCATTAGAGGGTGTGCCAGTTGGTAAAGCTACAATTTTAAATACAGAAAACTTGTCTAGTACACCTGCTCCG…	400	1041	1201	3123	1923	Human
BRCA2_3000_3419_pDONR221	ATGACAGAAGGAAAGAGATACAGAATTTATCATCTTGCAACTTCAAAATCTAAAAGTAAATCTGAAAGAGCTAACATACAGTTAGCAGCGACAAAAAAAACTCAGTATCAACAACTACCGGTTTCAGATGAAATTTTATTTCAGATTTACCAGCCACGGGAGCCCCTTCACTTCAGCAAATTTTTAGATCCAGACTTTCAGCCATCTTGTTCTGAGGTGGACCTAATAGGATTTGTCGTTTCTGTTGTGAAAAAAACAGGACTTGCCCCTTTCGTCTATTTGTCAGACGAATGTTACAATTTACTGGCAATAAAGTTTTGGATAGACCTTAATGAGGACATTATTAAGCCTCATATGTTAATTGCTGCAAGCAACCTCCAGTGGCGACCAGAATCCAAA…	3000	3419	9001	10257	1257	Human
BARD1_200778_pDONR221	ATGAGATCTGGAAAAAAGCAAAAAAAGAAAACTTTAGCTGAAATCAACCAAAAATGGAATTTAGAGGCAGAAAAAGAAGATGGTGAATTTGACTCCAAAGAGGAATCTAAGCAAAAGCTGGTATCCTTCTGTAGCCAACCATCTGTTATCTCCAGTCCTCAGATAAATGGTGAAATAGACTTACTAGCAAGTGGCTCCTTGACAGAATCTGAATGTTTTGGAAGTTTAACTGAAGTCTCTTTACCATTGGCTGAGCAAATAGAGTCTCCAGACACTAAGAGCAGGAATGAAGTAGTGACTCCTGAGAAGGTCTGCAAAAATTATCTTACATCTAAGAAATCTTTGCCATTAGAAAATAATGGAAAACGTGGCCATCACAATAGACTTTCCAGTCCCATT…	200	778	601	2334	1734	Human
MMS19_1500_pDONR221	ATGGCCGCTGCCGCGGCTGTGGAGGCGGCGGCGCCTATGGGTGCCCTATGGGGCCTCGTGCACGACTTCGTCGTGGGTCAGCAAGAGGGCCCCGCTGACCAGGTGGCTGCAGATGTGAAATCTGGCAACTATACAGTGTTACAAGTTGTGGAAGCCCTTGGGTCCTCTCTAGAGAATCCAGAACCCCGAACTCGGGCACGAGCAATCCAGCTTTTGTCACAGGTGCTACTCCACTGTCACACCTTGCTCCTGGAGAAGGAAGTGGTACACCTGATACTGTTCTATGAGAACCGGCTGAAGGACCATCATCTTGTGATCCCATCTGTCCTGCAGGGTTTGAAGGCACTTAGCCTGTGTGTGGCCCTGCCCCCAGGGCTGGCTGTTTCTGTGCTTAAAGCC…	1	500	4	1500	1497	Human
MDC1_1_500_pDONR221	ATGGAGGACACCCAGGCTATTGACTGGGATGTTGAAGAAGAGGAGGAGACAGAGCAATCCAGTGAATCCTTGAGGTGTAACGTGGAGCCAGTAGGGCGGCTACATATCTTTAGTGGTGCCCATGGACCAGAAAAAGATTTCCCACTACACCTCGGGAAGAATGTGGTAGGCCGAATGCCTGACTGCTCTGTGGCCCTGCCCTTTCCATCTATCTCCAAACAACATGCAGAGATTGAAATCTTAGCCTGGGACAAGGCACCTATCCTCCGAGACTGTGGGAGCCTTAATGGTACTCAAATCCTGAGACCTCCTAAGGTTTTGAGCCCTGGGGTGAGTCACCGTCTGAGGGACCAGGAATTGATTCTCTTTGCTGACTTGCTCTGCCAGTACCATCGCCTG…	1	500	4	1500	1497	Human
LIG3_300900_pDONR221	ATGGGTGATGTGTACCTAACAGTGAAGCTGCTGCTGCCAGGAGTCATTAAGACTGTTTACAACTTGAACGATAAGCAGATTGTGAAGCTTTTCAGTCGCATTTTTAACTGCAACCCAGATGATATGGCACGGGACCTAGAGCAGGGTGACGTGTCAGAGACAATCAGAGTCTTCTTTGAGCAGAGCAAGTCTTTCCCCCCAGCTGCCAAGAGCCTCCTTACCATCCAGGAAGTGGATGAGTTCCTTCTGCGGCTGTCCAAGCTCACCAAGGAGGATGAGCAGCAACAGGCCCTACAGGACATTGCCTCCAGGTGTACAGCCAATGACCTTAAATGCATCATCAGGTTGATCAAACATGATCTGAAGATGAACTCAGGTGCAAAACATGTGTTAGACGCC…	300	900	901	2700	1800	Human
HUWE1_2500_3000_pDONR221	ATGAGTGCTACAGACATCCCCCCATCCCCAGGAAATATCCCTACCACCCATCCACTGATGGTGCGCCATGCAGACCACAGTTCTCTGACACTGGGCAGTGGCTCTTCAACAACTCGTCTCACCCAGGGCATCGGGCGCAGTCAGAGGACCCTAAGGCAGCTGACGGCCAATACTGGCCACACCATTCATGTTCACTACCCTGGGAATCGCCAGCCCAACCCTCCTCTTATACTGCAGAGGTTGCTTGGTCCCTCAGCTGCTGCTGACATCCTTCAGCTGAGCAGCAGCCTTCCCCTACAAAGCCGGGGTCGGGCCCGCCTCCTGGTAGGCAACGATGACGTCCACATCATCGCCCGTTCTGATGATGAGCTGCTGGATGACTTTTTCCATGATCAGAGC…	2500	3000	7501	9000	1500	Human
FANCB_1500_pDONR221	ATGACTAGCAAACAAGCAATGTCATCTAACGAACAAGAAAGGCTCTTGTGTTATAATGGGGAAGTCCTTGTTTTCCAGTTGTCTAAAGGAAATTTTGCAGATAAAGAGCCTACAAAAACACCCATATTACATGTCAGAAGAATGGTATTTGACAGAGGAACAAAAGTATTTGTTCAGAAGTCCACTGGATTTTTTACCATAAAGGAAGAAAACTCTCATTTAAAAATCATGTGTTGCAACTGTGTGTCAGATTTCAGAACTGGAATTAACCTCCCTTACATTGTGATAGAAAAAAATAAAAAGAATAATGTTTTTGAATATTTTTTACTAATCCTTCACAGTACTAATAAATTTGAAATGCGTTTGAGTTTTAAACTAGGCTATGAGATGAAGGATGGC…	1	500	4	1500	1497	Human
EXO1_1500_pDONR221	ATGGGGATACAGGGATTGCTACAATTTATCAAAGAAGCTTCAGAACCCATCCATGTGAGGAAGTATAAAGGGCAGGTAGTAGCTGTGGATACATATTGCTGGCTTCACAAAGGAGCTATTGCTTGTGCTGAAAAACTAGCCAAAGGTGAACCTACTGATAGGTATGTAGGATTTTGTATGAAATTTGTAAATATGTTACTATCTCATGGGATCAAGCCTATTCTCGTATTTGATGGATGTACTTTACCTTCTAAAAAGGAAGTAGAGAGATCTAGAAGAGAAAGACGACAAGCCAATCTTCTTAAGGGAAAGCAACTTCTTCGTGAGGGGAAAGTCTCGGAAGCTCGAGAGTGTTTCACCCGGTCTATCAATATCACACATGCCATGGCCCACAAAGTA…	1	500	4	1500	1497	Human
ERCC2_300761_pDONR221	ATGACGGACGCCCACCTGGCCAACCCCGTGCTGCCCGACGAAGTGCTGCAGGAGGCAGTGCCTGGCTCCATCCGCACGGCCGAGCATTTCCTGGGCTTCCTGAGGCGGCTGCTGGAGTACGTGAAGTGGCGGCTGCGTGTGCAGCATGTGGTGCAGGAGAGCCCGCCCGCCTTCCTGAGCGGCCTGGCCCAGCGCGTGTGCATCCAGCGCAAGCCCCTCAGATTCTGTGCTGAACGCCTCCGGTCCCTGCTGCATACTCTGGAGATCACCGACCTTGCTGACTTCTCCCCGCTCACCCTCCTTGCTAACTTTGCCACCCTTGTCAGCACCTACGCCAAAGGCTTCACCATCATCATCGAGCCCTTTGACGACAGAACCCCGACCATTGCCAACCCCATC…	300	761	901	2283	1383	Human
DCLRE1A_5001041_pDONR221	ATGAACTCAGCATGTTTCTGCAGAAAGGCATTAGAGGGTGTGCCAGTTGGTAAAGCTACAATTTTAAATACAGAAAACTTGTCTAGTACACCTGCTCCGAAGTATTTGAAAATATTGCCTTCTGGTCTTAAGTATAATGCAAGACATCCTTCTACCAAGGTAATGAAGCAAATGGATATAGGTGTGTATTTTGGACTACCTCCCAAAAGAAAGGAAGAGAAATTGCTAGGGGAAAGTGCATTAGAAGGGATAAACTTAAATCCAGTTCCAAGTCCTAATCAAAAGAGGTCCTCGCAGTGCAAGAGGAAAGCAGAAAAATCTTTAAGTGATTTAGAATTTGATGCAAGTACTTTACATGAGAGTCAGCTTTCTGTGGAACTTTCTAGTGAGAGGTCACAG…	500	1041	1501	3123	1623	Human
BRCA2_1500_2000_pDONR221	ATGAATCAACTAGTGACCTTCCAGGGACAACCCGAACGTGATGAAAAGATCAAAGAACCTACTCTATTGGGTTTTCATACAGCTAGCGGGAAAAAAGTTAAAATTGCAAAGGAATCTTTGGACAAAGTGAAAAACCTTTTTGATGAAAAAGAGCAAGGTACTAGTGAAATCACCAGTTTTAGCCATCAATGGGCAAAGACCCTAAAGTACAGAGAGGCCTGTAAAGACCTTGAATTAGCATGTGAGACCATTGAGATCACAGCTGCCCCAAAGTGTAAAGAAATGCAGAATTCTCTCAATAATGATAAAAACCTTGTTTCTATTGAGACTGTGGTGCCACCTAAGCTCTTAAGTGATAATTTATGTAGACAAACTGAAAATCTCAAAACATCAAAAAGT…	1500	2000	4501	6000	1500	Human
ATR_1_500_pDONR221	ATGGGGGAACATGGCCTGGAGCTGGCTTCCATGATCCCCGCCCTGCGGGAGCTGGGCAGTGCCACACCAGAGGAATATAATACAGTTGTACAGAAGCCAAGACAAATTCTGTGTCAATTCATTGACCGGATACTTACAGATGTAAATGTTGTTGCTGTAGAACTTGTAAAGAAAACTGACTCTCAGCCAACCTCCGTGATGTTGCTTGATTTCATCCAGCATATCATGAAATCCTCCCCACTTATGTTTGTAAATGTGAGTGGAAGCCATGAGGCCAAAGGCAGTTGTATTGAATTCAGTAATTGGATCATAACGAGACTTCTGCGGATTGCAGCAACTCCCTCCTGTCATTTGTTACACAAGAAAATCTGTGAAGTCATCTGTTCATTATTATTTCTT…	1	500	4	1500	1497	Human
MMS19_300800_pDONR221	ATGCTTTGGGCTTCTATCCGCAGAGAGGTGTTCCAGACGGCAAGTGAGCGGGTGGAGGCAGAGGGCCTGGCGGCCCTCCACTCCCTGACTGCGTGTTTGTCTCGCTCTGTGCTGAGGGCTGATGCTGAGGACCTCCTTGACTCCTTCCTTAGCAACATTCTACAGGACTGCAGGCACCACCTGTGTGAACCGGACATGAAACTGGTGTGGCCTAGTGCCAAGCTGTTGCAGGCAGCTGCAGGTGCATCTGCCCGGGCCTGTGACTCTGTCACCAGCAATGTACTGCCTTTACTGCTGGAACAGTTCCACAAGCACAGTCAGAGCAGCCAGCGGCGGACAATCCTTGAAATGCTCCTGGGTTTCTTGAAGCTGCAGCAGAAATGGAGCTATGAAGACAAA…	300	800	901	2400	1500	Human
MDC1_1700_2090_pDONR221	ATGCAATCTCCTGTCACCACAGACCAGCCTATTTCCCCTGAGCCTATTACTCAACCCAGTTGCATCAAGAGGCAGAGAGCCGCTGGGAACCCTGGCTCCCTCGCAGCTCCCATTGACCATAAGCCTTGCTCTGCACCCTTGGAACCTAAATCCCAGGCCTCAAGGAACCAAAGATGGGGAGCAGTGAGAGCAGCTGAATCCCTTACAGCCATTCCTGAGCCTGCCTCTCCCCAGCTTCTTGAGACACCAATTCATGCCTCCCAGATCCAAAAGGTGGAACCAGCAGGTAGATCTAGGTTCACCCCGGAGCTCCAGCCTAAGGCCTCTCAAAGCCGCAAGAGGTCTTTAGCTACCATGGATTCACCACCACATCAAAAACAGCCCCAAAGAGGGGAAGTC…	1700	2090	5101	6270	1170	Human
LIG3_5001010_pDONR221	ATGAATGGCATGTTCTCTGAGATCAAGTACGATGGAGAGCGAGTCCAGGTGCATAAGAATGGAGACCACTTCAGCTACTTCAGCCGCAGTCTCAAGCCCGTCCTTCCTCACAAGGTGGCCCACTTTAAGGACTACATTCCCCAGGCTTTTCCTGGGGGCCACAGCATGATCTTGGATTCTGAAGTGCTTCTGATTGACAACAAGACAGGCAAACCACTGCCCTTTGGGACTCTGGGAGTACACAAGAAAGCAGCCTTCCAGGATGCTAATGTCTGCCTGTTTGTTTTTGATTGTATCTACTTTAATGATGTCAGCTTGATGGACAGACCTCTGTGTGAGCGGCGGAAGTTTCTTCATGACAACATGGTTGAAATTCCAAACCGGATCATGTTCTCAGAA…	500	1010	1501	3030	1530	Human
HUWE1_3000_3500_pDONR221	ATGACAAATAGCTCAGCGCCTGCAGTGGTGGGGAATCCTGGTGTGACTGAAGTGAGCCCTGAGTTTCTGGCTGCCCTGCCTCCAGCCATTCAGGAGGAAGTACTGGCACAGCAGAGAGCTGAGCAGCAGCGACGAGAACTAGCACAGAATGCCAGCTCAGACACCCCTATGGACCCTGTGACCTTCATCCAGACTCTGCCCTCAGACCTGCGCCGTAGTGTCCTAGAGGATATGGAGGACAGTGTGTTAGCTGTGATGCCACCTGACATTGCAGCTGAGGCTCAAGCCCTGAGACGAGAGCAAGAAGCCCGGCAGCGACAGCTCATGCATGAGCGTCTGTTTGGGCACAGTAGCACCTCCGCACTCTCTGCTATTCTCCGAAGCCCGGCTTTCACCAGT…	3000	3500	9001	10500	1500	Human
FANCA_1_500_pDONR221	ATGTCCGACTCGTGGGTCCCGAACTCCGCCTCGGGCCAGGACCCAGGGGGCCGCCGGAGGGCCTGGGCCGAGCTGCTGGCGGGAAGGGTCAAGAGGGAAAAATATAATCCTGAAAGGGCACAGAAATTAAAGGAATCAGCTGTGCGCCTCCTGCGAAGCCATCAGGACCTGAATGCCCTTTTGCTTGAGGTAGAAGGTCCACTGTGTAAAAAATTGTCTCTCAGCAAAGTGATTGACTGTGACAGTTCTGAGGCCTATGCTAATCATTCTAGTTCATTTATAGGCTCTGCTTTGCAGGATCAAGCCTCAAGGCTGGGGGTTCCCGTGGGTATTCTCTCAGCCGGGATGGTTGCCTCTAGCGTGGGACAGATCTGCACGGCTCCAGCGGAGACCAGTCAC…	1	500	4	1500	1497	Human
EXO1_200600_pDONR221	ATGGGAATGTGCAGACAGCTTGGGGATGTATTCACGGAAGAGAAGTTTCGTTACATGTGTATTCTTTCAGGTTGTGACTACCTGTCATCACTGCGTGGGATTGGATTAGCAAAGGCATGCAAAGTCCTAAGACTAGCCAATAATCCAGATATAGTAAAGGTTATCAAGAAAATTGGACATTATCTCAAGATGAATATCACGGTACCAGAGGATTACATCAACGGGTTTATTCGGGCCAACAATACCTTCCTCTATCAGCTAGTTTTTGATCCCATCAAAAGGAAACTTATTCCTCTGAACGCCTATGAAGATGATGTTGATCCTGAAACACTAAGCTACGCTGGGCAATATGTTGATGATTCCATAGCTCTTCAAATAGCACTTGGAAATAAAGATATA…	200	600	601	1800	1200	Human
ERCC2_1500_pDONR221	ATGAAGCTCAACGTGGACGGGCTCCTGGTCTACTTCCCGTACGACTACATCTACCCCGAGCAGTTCTCCTACATGCGGGAGCTCAAACGCACGCTGGACGCCAAGGGTCATGGAGTCCTGGAGATGCCCTCAGGCACCGGGAAGACAGTATCCCTGTTGGCCCTGATCATGGCATACCAGAGAGCATATCCGCTGGAGGTGACCAAACTCATCTACTGCTCAAGAACTGTGCCAGAGATTGAGAAGGTGATTGAAGAGCTTCGAAAGTTGCTCAACTTCTATGAGAAGCAGGAGGGCGAGAAGCTGCCGTTTCTGGGACTGGCTCTGAGCTCCCGCAAAAACTTGTGTATTCACCCTGAGGTGACACCCCTGCGCTTTGGGAAGGACGTCGATGGGAAA…	1	500	4	1500	1497	Human
DBB1_5001141_pDONR221	ATGGCCTCCTGCAATAGCAGCCAGGTGGTGGTGGCTGTAGGCAGGGCCCTCTACTATCTGCAGATCCATCCTCAGGAGCTCCGGCAGATCAGCCACACAGAGATGGAACATGAAGTGGCTTGCTTGGACATCACCCCATTAGGAGACAGCAATGGACTGTCCCCTCTTTGTGCCATTGGCCTCTGGACGGACATCTCGGCTCGTATCTTGAAGTTGCCCTCTTTTGAACTACTGCACAAGGAGATGCTGGGTGGAGAGATCATTCCTCGCTCCATCCTGATGACCACCTTTGAGAGTAGCCATTACCTCCTTTGTGCCTTGGGAGATGGAGCGCTTTTCTACTTTGGGCTCAACATTGAGACAGGTCTGTTGAGCGACCGTAAGAAGGTGACTTTGGGC…	500	1141	1501	3423	1923	Human
BRCA1_1_500_pDONR221	ATGGATTTATCTGCTCTTCGCGTTGAAGAAGTACAAAATGTCATTAATGCTATGCAGAAAATCTTAGAGTGTCCCATCTGTCTGGAGTTGATCAAGGAACCTGTCTCCACAAAGTGTGACCACATATTTTGCAAATTTTGCATGCTGAAACTTCTCAACCAGAAGAAAGGGCCTTCACAGTGTCCTTTATGTAAGAATGATATAACCAAAAGGAGCCTACAAGAAAGTACGAGATTTAGTCAACTTGTTGAAGAGCTATTGAAAATCATTTGTGCTTTTCAGCTTGACACAGGTTTGGAGTATGCAAACAGCTATAATTTTGCAAAAAAGGAAAATAACTCTCCTGAACATCTAAAAGATGAAGTTTCTATCATCCAAAGTATGGGCTACAGAAACCGT…	1	500	4	1500	1497	Human
ATR_1600_2200_pDONR221	ATGGCTGAGAAATGTCCACACAGCAAATCAAACAGAAATAAGGTAGACTCAATGGTATCTACTGTGGATTATGAAGACTATCAGAGTGTAACCCGTTTTCTAGACCTCATACCCCAGGATACTCTGGCAGTAGCTTCCTTTCGCTCCAAAGCATACACACGAGCTGTAATGCACTTTGAATCATTTATTACAGAAAAGAAGCAAAATATTCAGGAACATCTTGGATTTTTACAGAAATTGTATGCTGCTATGCATGAACCTGATGGAGTGGCCGGAGTCAGTGCAATTAGAAAGGCAGAACCATCTCTAAAAGAACAGATCCTTGAACATGAAAGCCTTGGCTTGCTGAGGGATGCCACTGCTTGTTATGACAGGGCTATTCAGCTAGAACCAGACCAG…	1600	2200	4801	6600	1800	Human
MMS19_5001031_pDONR221	ATGAGTTGCAGGGTGGCAGCACTGGAAGCATCAGGAACCCTGGCTGCTCTCTACCCTGTGGCCTTCAGCAGCCACCTCGTACCCAAGCTCGCTGAGGAGCTGCGTGTAGGGGAGTCAAATTTGACTAACGGAGATGAGCCCACCCAATGCTCCCGGCATCTGTGCTGTCTGCAAGCCTTGTCAGCTGTATCAACACATCCCAGCATCGTCAAGGAGACACTGCCTCTGCTGCTGCAGCATCTCTGGCAAGTGAACAGAGGGAATATGGTTGCACAATCCAGTGACGTTATTGCTGTCTGTCAGAGCCTCAGACAGATGGCAGAAAAATGTCAGCAGGACCCTGAGAGTTGCTGGTATTTCCACCAGACAGCTATACCTTGCCTGCTTGCCTTGGCTGTG…	500	1031	1501	3093	1593	Human
MCM9_300900_pDONR221	ATGGCAGGAAGGAATGTAATATTGGCTAGCTTGTGCCCTCAAGTGTTTGGAATGTATCTAGTAAAGCTTGCTGTGGCCATGGTGCTGGCTGGTGGGATTCAAAGGACTGATGCTACAGGAACACGGGTCAGAGGAGAATCTCATCTTTTATTGGTTGGGGATCCTGGCACAGGGAAATCTCAGTTCCTCAAATATGCAGCAAAGATTACACCAAGATCTGTGCTGACCACAGGAATTGGATCTACTAGTGCAGGTCTGACGGTAACTGCTGTAAAAGACTCAGGAGAATGGAATTTGGAGGCTGGGGCATTAGTTCTTGCAGATGCGGGCCTTTGCTGTATTGATGAGTTCAATAGCCTCAAAGAGCATGATAGGACCAGTATCCATGAAGCAATGGAG…	300	900	901	2700	1800	Human
INO80_1000_1557_pDONR221	ATGTGCCTGCTCACTGAGCTGCCATCTTTTTTGTGTGTGGCCAGTCCACGAGTTACCGCAGTGCCATTGGATTCTTACTGCAATGACCGAAGTGCAGAATATGAAAGGCGAGTTCTGAAGGAAGGAGGGAGTCTGGCAGCCAAGCAGTGTTTGTTGAATGGGGCCCCTGAACTGGCTGCAGACTGGCTAAATAGACGATCACAGTTCTTCCCAGAGCCAGCTGGAGGTCTGTGGAGCATCAGACCTCAGAATGGCTGGTCTTTCATCAGGATTCCAGGCAAGGAGAGCCTCATCACTGACAGTGGAAAGCTGTATGCCCTTGATGTCCTGCTGACTCGGCTCAAGTCTCAAGGGCATAGGGTCCTTATCTACTCCCAGATGACCAGGATGATAGACCTA…	1000	1557	3001	4671	1671	Human
HUWE1_1_500_pDONR221	ATGAAAGTAGACAGGACTAAACTGAAGAAGACACCTACTGAGGCTCCTGCAGACTGCAGAGCCTTAATAGACAAACTCAAAGTTTGTAATGATGAGCAACTTCTCTTGGAACTGCAGCAGATCAAAACATGGAACATTGGAAAGTGCGAGTTATATCACTGGGTGGACCTGTTGGACCGCTTCGATGGAATACTGGCAGATGCTGGACAGACAGTGGAGAATATGTCATGGATGCTCGTATGTGATAGGCCAGAAAGAGAGCAACTGAAAATGCTTCTCTTGGCTGTGTTGAACTTCACAGCCTTGCTCATTGAGTACAGCTTTTCCCGGCATCTGTACAGTTCCATAGAGCATTTGACAACTTTATTGGCTTCCTCTGATATGCAAGTGGTGCTGGCA…	1	500	4	1500	1497	Human
FANCA_1000_1500_pDONR221	ATGTCAGAAAATTCTGATTTGGTCTTTGGTGGCCGCACAGGAAATGAGGATATTATTTCCAGATTGCAGGAGATGGTAGCTGACCTGGAGCTGCAGCAAGACCTCATAGTGCCTCTCGGCCACACCCCTTCCCAGGAGCACTTCCTCTTTGAGATTTTCCGCAGACGGCTCCAGGCTCTGACAAGCGGGTGGAGCGTGGCTGCCAGCCTTCAGAGACAGAGGGAGCTGCTAATGTACAAACGGATCCTCCTCCGCCTGCCTTCGTCTGTCCTCTGCGGCAGCAGCTTCCAGGCAGAACAGCCCATCACTGCCAGATGCGAGCAGTTCTTCCACTTGGTCAACTCTGAGATGAGAAACTTCTGCTCCCACGGAGGTGCCCTGACACAGGACATCACTGCC…	1000	1500	3001	4500	1500	Human
ERCC6_500_1000_pDONR221	ATGGGTTTTCTGTTCAAAAAGCTTTTTAAGTACCAGCAGACAGGTGTTAGGTGGCTGTGGGAATTGCACTGCCAGCAGGCAGGAGGAATTCTGGGAGATGAAATGGGATTGGGCAAGACCATCCAGATAATTGCCTTCTTGGCAGGTCTGAGCTACAGCAAGATCAGGACTCGTGGTTCAAATTACAGGTTTGAGGGGTTGGGTCCAACTGTAATTGTCTGTCCAACAACAGTGATGCATCAGTGGGTGAAGGAATTTCACACGTGGTGGCCTCCGTTCAGAGTGGCAATTCTACATGAAACCGGTTCCTATACCCACAAAAAGGAGAAACTAATTCGAGATGTTGCTCATTGTCATGGAATTTTGATCACATCTTACTCCTACATTCGATTGATGCAG…	500	1000	1501	3000	1500	Human
DNA2_80520_pDONR221	ATGATCCTTAGGAATGACTGGTGTTCTGTTCCAGTAGAGCCAGGAGATATCATTCATTTGGAGGGAGACTGCACATCTGACACTTGGATAATAGATAAAGATTTTGGATATTTGATTCTGTATCCAGACATGCTGATTTCTGGCACCAGCATAGCCAGTAGTATTCGATGTATGAGAAGAGCTGTCCTGAGTGAAACTTTTAGGAGCTCTGATCCAGCCACACGCCAAATGCTAATTGGTACGGTTCTCCATGAGGTGTTTCAAAAAGCCATAAATAATAGCTTTGCCCCAGAAAAGCTACAAGAACTTGCTTTTCAAACAATTCAAGAAATAAGACATTTGAAGGAAATGTACCGCTTAAATCTAAGTCAAGATGAAATAAAACAAGAAGTAGAGGAC…	80	520	241	1560	1320	Human
CNOT1_260_685_pDONR221	ATGGAAGTAGGCTATGGCTTTTGTGCAAGTATTGAAGAATGTCGCAATATAATCGTGCAGTTTGGTGTTCGGGAGGTCACAGCTGCCCAGGTTGCAAGGGTTTTGGGAATGATGGCTCGAACTCATTCAGGATTAACAGATGGCATTCCATTACAGAGTATTTCTGCTCCGGGCAGTGGGATCTGGAGTGATGGGAAAGATAAAAGTGATGGAGCACAGGCACACACATGGAATGTAGAAGTCTTGATTGACGTTCTTAAAGAACTGAATCCAAGTTTGAATTTCAAGGAAGTAACTTATGAACTGGACCATCCTGGATTTCAAATTCGTGACAGTAAAGGACTTCATAATGTGGTTTATGGCATTCAGAGGGGTTTGGGTATGGAAGTGTTCCCAGTA…	260	685	781	2055	1275	Human
BRCA1_1300_1885_pDONR221	ATGAGTGAATTGGAAGACTTGACTGCAAATACAAACACCCAGGATCCTTTCTTGATTGGTTCTTCCAAACAAATGAGGCATCAGTCTGAAAGCCAGGGAGTTGGTCTGAGTGACAAGGAATTGGTTTCAGATGATGAAGAAAGAGGAACGGGCTTGGAAGAAAATAATCAAGAAGAGCAAAGCATGGATTCAAACTTAGGTGAAGCAGCATCTGGGTGTGAGAGTGAAACAAGCGTCTCTGAAGACTGCTCAGGGCTATCCTCTCAGAGTGACATTTTAACCACTCAGCAGAGGGATACCATGCAACATAACCTGATAAAGCTCCAGCAGGAAATGGCTGAACTAGAAGCTGTGTTAGAACAGCATGGGAGCCAGCCTTCTAACAGCTACCCTTCCATC…	1300	1885	3901	5655	1755	Human
ATR_2100_2645_pDONR221	ATGGCATATGAATGGGAAAAAGCTGGCCGCTCCGATCGTGTACAAATGAGGAATGATTTGGGTAAAATAAACAAGGTTATCACAGAGCATACAAACTATTTAGCTCCATATCAATTTTTGACTGCTTTTTCACAATTGATCTCTCGAATTTGTCATTCTCACGATGAAGTTTTTGTTGTCTTGATGGAAATAATAGCCAAAGTATTTCTAGCCTATCCTCAACAAGCAATGTGGATGATGACAGCTGTGTCAAAGTCATCTTATCCCATGCGTGTGAACAGATGCAAGGAAATCCTCAATAAAGCTATTCATATGAAAAAATCCTTAGAGAAGTTTGTTGGAGATGCAACTCGCCTAACAGATAAGCTTCTAGAATTGTGCAATAAACCGGTTGATGGA…	2100	2645	6301	7935	1635	Human
MLH3_500_1000_pDONR221	ATGTGTGGAACCAGTTTAGAAATGTTTTTAAGCCCTTTTCAGACACCATGTCACTTTGAGGAGAGTGGGCAGGATCTAGAAATATGGAAAGAAAGTACTACTGTTAATGGCATGGCTGCCAACATCTTGAAAAATAATAGAATTCAGAATCAACCAAAGAGATTTAAAGATGCTACTGAAGTGGGATGCCAGCCTCTGCCTTTTGCAACAACATTATGGGGAGTACATAGTGCTCAGACAGAGAAAGAGAAAAAAAAAGAATCTAGCAATTGTGGAAGAAGAAATGTTTTTAGTTATGGGCGAGTTAAATTATGTTCCACTGGCTTTATAACTCATGTAGTACAAAATGAAAAAACTAAATCAACTGAAACAGAACATTCATTTAAAAATTATGTTAGA…	500	1000	1501	3000	1500	Human
MCM8_200600_pDONR221	ATGTATGAGCCTTTGACACAGCTCAAGAATGTCAGAGCAAATTACTATGGAAAATACATTGCTCTAAGAGGGACAGTGGTTCGTGTCAGTAATATAAAGCCTCTTTGCACCAAGATGGCTTTTCTTTGTGCTGCATGTGGAGAAATTCAGAGCTTTCCTCTTCCAGATGGAAAATACAGTCTTCCCACAAAGTGTCCTGTGCCTGTGTGTCGAGGCAGGTCATTTACTGCTCTCCGCAGCTCTCCTCTCACAGTTACGATGGACTGGCAGTCAATCAAAATCCAGGAATTGATGTCTGATGATCAGAGAGAAGCAGGTCGGATTCCACGAACAATAGAATGTGAGCTTGTTCATGATCTTGTGGATAGCTGTGTCCCGGGAGACACAGTGACTATTACT…	200	600	601	1800	1200	Human
INO80_500_1000_pDONR221	ATGTCTATCCGGGCTGGTGAGGATATTCCACAGCCCACAATTTTTAATGGCAAATTGAAAGGTTATCAACTGAAAGGCATGAATTGGTTGGCCAATCTATATGAACAGGGTATTAATGGCATTCTTGCTGATGAAATGGGCCTTGGTAAAACAGTACAGAGCATTGCCCTTCTGGCCCATCTGGCTGAGAGAGAGAACATTTGGGGACCTTTCTTAATAATTTCACCTGCGTCTACACTTAACAATTGGCACCAGGAGTTTACTAGATTTGTTCCTAAATTTAAGGTGCTACCATATTGGGGAAATCCTCATGATAGAAAAGTCATCAGAAGGTTCTGGAGTCAGAAGACCCTCTACACTCAGGATGCCCCCTTCCATGTGGTTATTACCAGCTATCAG…	500	1000	1501	3000	1500	Human
HELQ_7001101_pDONR221	ATGTATAAACAGATGATTGGCAGAGCTGGTCGTGCTGGAATAGATACTATTGGGGAGAGTATCCTCATATTGCAAGAAAAAGACAAACAACAGGTATTGGAGTTAATAACTAAACCATTGGAAAACTGTTACAGCCATCTTGTTCAGGAATTCACCAAGGGAATCCAAACATTATTTCTCTCTTTGATTGGTTTGAAGATTGCAACGAATCTTGATGACATCTATCATTTCATGAATGGTACATTTTTTGGTGTTCAGCAAAAGGTTTTATTGAAAGAAAAAAGTCTCTGGGAAATAACTGTTGAATCACTTAGATACCTGACAGAAAAAGGACTCCTACAAAAAGACACTATTTATAAGTCTGAAGAAGAGGTCCAATATAATTTTCATATTACAAAG…	700	1101	2101	3303	1203	Human
FANCA_700_1200_pDONR221	ATGAAGATTCAGCTCAGCATCAACACGCCGAGACTGGAGCCACGGGAACACATGGCTGTGGACCTCCTGCTGACGTCTTTCTGTCAGAACCTGATGGCTGCCTCCAGTGTCGCTCCCCCGGAGAGGCAGGGTCCCTGGGCTGCCCTCTTCGTGAGGACCATGTGTGGACGTGTGCTCCCTGCAGTGCTCACCCGGCTCTGCCAGCTGCTCCGTCACCAGGGCCCGAGCCTGAGTGCCCCACATGTGCTGGGGTTGGCTGCCCTGGCCGTGCACCTGGGTGAGTCCAGGTCTGCGCTCCCAGAGGTGGATGTGGGTCCTCCTGCACCTGGTGCTGGCCTTCCTGTCCCTGCGCTCTTTGACAGCCTCCTGACCTGTAGGACGAGGGATTCCTTGTTCTTC…	700	1200	2101	3600	1500	Human
ERCC6_1000_1494_pDONR221	ATGCTCTATGAGCTATTTACTCTGACTAGTCCTGATGCATCCCAGAGCACTGAAACAAGTGCAATTTTTGCAGGAACTGGATCAGATGTTCAGACACCCAAATGCCATCTAAAAAGAAGGATTCAACCAGCCTTTGGAGCAGACCATGATGTTCCAAAACGCAAGAAGTTCCCTGCTTCTAACATATCTGTAAATGATGCCACATCATCTGAAGAGAAATCTGAGGCTAAAGGAGCTGAAGTAAATGCAGTAACTTCTAATCGAAGTGATCCTTTGAAAGATGACCCTCACATGAGTAGTAATGTAACTAGCAATGATAGGCTTGGAGAAGAGACAAATGCAGTATCTGGACCAGAAGAGTTGTCAGTGATTAGTGGAAATGGGGAATGTTCAAATTCT…	1000	1494	3001	4482	1482	Human
DNA2_5201061_pDONR221	ATGAGTGGAGAAGAAAGGTCACTGTTTGCTTTGTCTAGAGGATATGTGAAGGAGATTAACATGACAACAGTAACTTGTTTATTAGACAGAAACTTGTCGGTCCTTCCAGAATCAACTTTGTTCAGATTAGACCAAGAAGAAAAAAATTGTGATATAGATACCCCATTAGGAAATCTTTCCAAATTGATGGAAAACACGTTTGTCAGCAAAAAACTTCGAGATTTAATTATTGACTTTCGTGAACCTCAGTTTATATCCTACCTTAGTTCTGTTCTTCCACATGATGCAAAGGATACAGTTGCCTGCATTCTAAAGGGTTTGAATAAGCCTCAGAGGCAAGCGATGAAAAAGGTACTTCTTTCAAAAGACTACACACTCATCGTGGGTATGCCTGGGACA…	520	1061	1561	3183	1623	Human
CNOT1_1000_1500_pDONR221	ATGCCTCCTGTGAAAATGCAAGGCTCTATCACAACCCCTGGAAGTATTGCACTGGCTCAGGCCCAGGCTCAGGCCCAGGTTCCAGCAAAAGCTCCTCTTGCTGGTCAAGTTAGCACTATGGTAACCACCTCAACAACTACCACTGTTGCTAAAACGGTTACGGTCACCAGGCCAACTGGAGTCAGCTTTAAGAAAGATGTGCCACCTTCTATTAATACTACAAATATAGATACGTTGCTTGTGGCCACAGATCAAACTGAGAGAATTGTGGAGCCCCCAGAAAATATCCAGGAGAAAATTGCTTTTATTTTCAATAATCTCTCACAGTCAAATATGACACAAAAGGTTGAAGAGCTAAAGGAAACGGTGAAAGAAGAATTTATGCCTTGGGTTTCACAG…	1000	1500	3001	4500	1500	Human
BRCA1_300_800_pDONR221	ATGAAGGCTGAATTCTGTAATAAAAGCAAACAGCCTGGCTTAGCAAGGAGCCAACATAACAGATGGGCTGGAAGTAAGGAAACATGTAATGATAGGCGGACTCCCAGCACAGAAAAAAAGGTAGATCTGAATGCTGATCCCCTGTGTGAGAGAAAAGAATGGAATAAGCAGAAACTGCCATGCTCAGAGAATCCTAGAGATACTGAAGATGTTCCTTGGATAACACTAAATAGCAGCATTCAGAAAGTTAATGAGTGGTTTTCCAGAAGTGATGAACTGTTAGGTTCTGATGACTCACATGATGGGGAGTCTGAATCAAATGCCAAAGTAGCTGATGTATTGGACGTTCTAAATGAGGTAGATGAATATTCTGGTTCTTCAGAGAAAATAGACTTACTG…	300	800	901	2400	1500	Human
ATM_1960_2566_pDONR221	ATGTATGCAGATAAGAAAAGTATGGATGATCAAGAGAAAAGAAGTCTTGCATTTGAAGAAGGAAGCCAGAGTACAACTATTTCTAGCTTGAGTGAAAAAAGTAAAGAAGAAACTGGAATAAGTTTACAGGATCTTCTCTTAGAAATCTACAGAAGTATAGGGGAGCCAGATAGTTTGTATGGCTGTGGTGGAGGGAAGATGTTACAACCCATTACTAGACTACGAACATATGAACACGAAGCAATGTGGGGCAAAGCCCTAGTAACATATGACCTCGAAACAGCAATCCCCTCATCAACACGCCAGGCAGGAATCATTCAGGCCTTGCAGAATTTGGGACTCTGCCATATTCTTTCCGTCTATTTAAAAGGATTGGATTATGAAAATAAAGACTGGTGT…	1960	2566	5881	7698	1818	Human
MLH3_1000_1454_pDONR221	ATGCCCAGTGGAATGTTAATGAATCCGGTAGAAGATGCCACAGGTGACCAAAATGGAATTTGTTTTCAGAGTGAGGAATCTAAAGCAAGAGCTTGTTCTGAAACTGAAGAGTCAAACACGTGTTGTTCAGATTGGCAGCGGCATTTCGATGTAGCCCTGGGAAGAATGGTTTATGTCAACAAAATGACTGGACTCAGCACATTCATTGCCCCAACTGAGGACATTCAGGCTGCTTGTACTAAAGACCTGACAACTGTGGCTGTGGATGTTGTACTTGAGAATGGGTCTCAGTACAGGTGTCAACCTTTTAGAAGCGACCTTGTTCTTCCTTTCCTTCCGAGAGCTCGAGCAGAGAGGACTGTGATGAGACAGGATAACAGAGATACTGTGGATGATACT…	1000	1454	3001	4362	1362	Human
MCM8_300881_pDONR221	ATGCAGAGAGAAGCAGGTCGGATTCCACGAACAATAGAATGTGAGCTTGTTCATGATCTTGTGGATAGCTGTGTCCCGGGAGACACAGTGACTATTACTGGAATTGTCAAAGTCTCAAATGCGGAAGAAGGTTCTCGAAATAAGAATGACAAGTGTATGTTCCTTTTGTATATTGAAGCAAATTCTATTAGTAATAGCAAAGGACAGAAAACAAAGAGTTCTGAGGATGGGTGTAAGCATGGAATGTTGATGGAGTTCTCACTTAAAGACCTTTATGCCATCCAAGAGATTCAAGCTGAAGAAAACCTGTTTAAACTCATTGTCAAATGGAGTCTTGCTCTGTCGCCCAGGCTAGAGTACAGTGGTGCGATCTCAGCTCACTGCAACCTCCACCTCCCA…	300	881	901	2643	1743	Human
INO80_1_526_pDONR221	ATGGCCTCGGAGTTGGGTGCCAGGGATGATGGAGGCTGCACTGAGCTGGCAAAGCCCCTCTATCTTCAGTACTTGGAGAGGGCCCTCCGGTTGGACCATTTTCTGCGACAAACGTCAGCTATCTTCAATAGGAATATTTCTAGTGATGACAGTGAAGATGGACTGGATGACAGTAATCCATTATTGCCCCAGTCTGGGGATCCCTTAATACAAGTTAAGGAAGAACCTCCAAATTCATTGCTTGGTGAAACTTCTGGAGCAGGCAGTTCTGGAATGTTAAACACATATTCTCTGAATGGAGTTCTACAGTCAGAATCAAAATGTGATAAGGGGAATTTATATAATTTCTCTAAGCTGAAGAAAAGCAGAAAGTGGCTAAAGAGCATTCTGCTAAGTGAT…	1	526	4	1578	1575	Human
HELQ_1500_pDONR221	ATGGATGAATGTGGTTCCCGCATCCGCCGGCGGGTGTCTCTCCCCAAAAGGAACCGTCCAAGCTTGGGGTGTATTTTTGGCGCTCCCACCGCGGCCGAGCTCGTGCCCGGAGATGAGGGGAAAGAGGAGGAGGAAATGGTGGCTGAGAACAGGAGGCGGAAAACCGCGGGCGTACTGCCGGTTGAGGTACAGCCCCTTCTACTCTCAGATTCCCCGGAATGTCTCGTCCTTGGAGGTGGTGATACAAACCCGGACCTCCTACGTCACATGCCCACTGACAGAGGGGTGGGAGACCAGCCTAATGACAGTGAAGTGGACATGTTTGGTGACTATGATAGCTTTACTGAAAACTCCTTTATAGCTCAAGTTGACGACCTGGAACAAAAATATATGCAACTC…	1	500	4	1500	1497	Human
FAN1_6001018_pDONR221	ATGGATCTTATCAGATATGCAGCAGCCACGCACATGCTGAGTGACATTTCTTCCGCAATGGCCAATGGGAACTGGGAAGAAGCTAAGGAGCTCGCTCAGTGTGCAAAAAGGGATTGGAACAGACTGAAAAACCACCCTTCTCTGAGATGCCACGAAGATTTACCACTCTTCCTGCGGTGTTTCACTGTTGGGTGGATTTATACAAGGATTTTGTCTCGGTTTGTGGAAATACTGCAGAGACTTCACATGTATGAGGAAGCCGTCAGAGAACTTGAAAGCCTTTTGTCTCAGAGAATTTATTGTCCTGACAGCAGAGGCCGATGGTGGGATCGACTGGCCCTTAATTTACACCAGCACTTGAAGCGCCTGGAACCGACTATCAAGTGCATCACAGAGGGG…	600	1018	1801	3054	1254	Human
ERCC6_1_500_pDONR221	ATGCCAAATGAGGGAATCCCCCACTCAAGTCAAACTCAGGAGCAAGACTGTTTACAGAGTCAACCTGTCAGTAATAATGAAGAAATGGCAATCAAGCAAGAAAGTGGTGGTGATGGGGAGGTGGAGGAGTACCTCTCCTTTCGTTCTGTGGGTGACGGGCTGTCCACCTCTGCTGTGGGGTGCGCATCAGCAGCTCCGAGGAGAGGGCCAGCCCTGCTGCACATCGACCGACATCAGATCCAGGCAGTAGAGCCTAGCGCCCAGGCCCTTGAGCTGCAGGGTTTGGGTGTGGACGTCTATGACCAGGACGTGCTGGAACAGGGAGTGCTTCAGCAGGTGGACAATGCCATCCATGAGGCCAGCCGTGCCTCCCAGCTCGTTGACGTGGAGAAGGAGTAT…	1	500	4	1500	1497	Human
DIS3L2_300886_pDONR221	ATGTTCATCTGCCGCATTGTGGACTGGAAGGAGGACTGCAATTTTGCCCTGGGGCAGCTGGCTAAGAGTCTTGGGCAGGCTGGTGAAATTGAGCCTGAAACAGAAGGAATACTAACAGAGTATGGCGTGGATTTCTCTGATTTCTCTTCAGAAGTTCTAGAATGTCTTCCTCAAGGCCTGCCATGGACAATTCCACCAGAGGAGTTCAGCAAGAGAAGGGATTTAAGAAAAGACTGTATCTTCACCATTGACCCATCAACCGCCCGAGACCTCGATGATGCCCTCTCCTGCAAGCCACTCGCTGACGGCAACTTCAAAGTGGGAGTTCACATTGCTGACGTGAGTTACTTTGTTCCGGAGGGATCTGATCTGGATAAAGTGGCTGCCGAGAGGGCTACA…	300	886	901	2658	1758	Human
CNOT1_1800_2350_pDONR221	ATGAATGCTCCAGAAGGATTGCCCCAGCTGATGGAAGTAGTGCGATCCAACTATGAAGCAATGATTGATCGTGCTCATGGAGGCCCAAACTTTATGATGCATTCTGGGATCTCTCAAGCCTCAGAGTATGATGACCCTCCAGGCCTGAGGGAGAAGGCAGAGTATCTTCTGAGGGAATGGGTGAATCTCTACCATTCAGCAGCAGCTGGCCGCGACAGTACCAAAGCTTTCTCTGCATTTGTTGGACAGATGCACCAGCAAGGAATACTGAAGACCGATGATCTCATAACAAGGTTCTTTCGTCTGTGTACTGAAATGTGTGTTGAAATCAGTTACCGTGCTCAGGCTGAGCAGCAGCACAATCCTGCTGCCAATCCCACCATGATCCGAGCCAAGTGC…	1800	2350	5401	7050	1650	Human
BLM_600_1100_pDONR221	ATGTCCTCAGCCAAGACAGACTGTCTTCCAGTGTCATCTACTGCTCAAAATATAAACTTCTCAGAGTCAATTCAGAATTATACTGACAAGTCAGCACAAAATTTAGCATCCAGAAATCTGAAACATGAGCGTTTCCAAAGTCTTAGTTTTCCTCATACAAAGGAAATGATGAAGATTTTTCATAAAAAATTTGGCCTGCATAATTTTAGAACTAATCAGCTAGAGGCGATCAATGCTGCACTGCTTGGTGAAGACTGTTTTATCCTGATGCCGACTGGAGGTGGTAAGAGTTTGTGTTACCAGCTCCCTGCCTGTGTTTCTCCTGGGGTCACTGTTGTCATTTCTCCCTTGAGATCACTTATCGTAGATCAAGTCCAAAAGCTGACTTCCTTGGATATT…	600	1100	1801	3300	1500	Human
ATM_2600_3057_pDONR221	ATGGCTGCAAATAGAATAATATGTACTATCAGAAGTAGGAGACCTCAGATGGTCAGAAGTGTTGAGGCACTTTGTGATGCTTATATTATATTAGCAAACTTAGATGCCACTCAGTGGAAGACTCAGAGAAAAGGCATAAATATTCCAGCAGACCAGCCAATTACTAAACTTAAGAATTTAGAAGATGTTGTTGTCCCTACTATGGAAATTAAGGTGGACCACACAGGAGAATATGGAAATCTGGTGACTATACAGTCATTTAAAGCAGAATTTCGCTTAGCAGGAGGTGTAAATTTACCAAAAATAATAGATTGTGTAGGTTCCGATGGCAAGGAGAGGAGACAGCTTGTTAAGGGCCGTGATGACCTGAGACAAGATGCTGTCATGCAACAGGTCTTC…	2600	3057	7801	9171	1371	Human
MLH3_1_500_pDONR221	ATGATCAAGTGCTTGTCAGTTGAAGTACAAGCCAAATTGCGTTCTGGTTTGGCCATAAGCTCCTTGGGCCAATGTGTTGAGGAACTTGCCCTCAACAGTATTGATGCTGAAGCAAAATGTGTGGCTGTCAGGGTGAATATGGAAACCTTCCAAGTTCAAGTGATAGACAATGGATTTGGGATGGGGAGTGATGATGTAGAGAAAGTGGGAAATCGTTATTTCACCAGTAAATGCCACTCGGTACAGGACTTGGAGAATCCAAGGTTTTATGGTTTCCGAGGAGAGGCCTTGGCAAATATTGCTGACATGGCCAGTGCTGTGGAAATTTCGTCCAAGAAAAACAGGACAATGAAAACTTTTGTGAAACTGTTTCAGAGTGGAAAAGCCCTGAAAGCTTGT…	1	500	4	1500	1497	Human
MCM8_1500_pDONR221	ATGAATGGAGAGTATAGAGGCAGAGGATTTGGACGAGGAAGATTTCAAAGCTGGAAAAGGGGAAGAGGTGGTGGGAACTTCTCAGGAAAATGGAGAGAAAGAGAACACAGACCTGATCTGAGTAAAACCACAGGAAAACGTACTTCTGAACAAACCCCACAGTTTTTGCTTTCAACAAAGACCCCACAGTCAATGCAGTCAACATTGGATCGATTCATACCATATAAAGGCTGGAAGCTTTATTTCTCTGAAGTTTACAGCGATAGCTCTCCTTTGATTGAGAAGATTCAAGCATTTGAAAAATTTTTCACAAGGCATATTGATTTGTATGACAAGGATGAAATAGAAAGAAAGGGAAGTATTTTGGTAGATTTTAAAGAACTGACAGAAGGTGGTGAA…	1	500	4	1500	1497	Human
HUWE1_2000_2500_pDONR221	ATGTTTGATACGCAGTCAGGTTTTTCCATTAATAGTCAGGTCTTTGCTGCAGATGGTGCCTCCACTGAGACTTCCGCATCTGGGACCTCCCAAGGAGAGGCTTCAACTCCAGAGGAGTCTCGAGATGGGAAGAAAGATAAAGAAGGGGACCGGGCCTCTGAGGAAGGCAAACAGAAAGGCAAGGGCAGCAAACCTTTAATGCCTACCTCCACTATCCTTCGTCTTCTGGCAGAGTTGGTGAGGTCCTATGTTGGTATTGCTACCCTGATTGCCAACTACAGCTACACTGTGGGCCAGTCTGAACTGATCAAAGAGGACTGCAGTGTGCTAGCTTTTGTTCTGGACCACCTGCTCCCACATACCCAGAATGCAGAAGACAAGGACACCCCTGCCTTGGCC…	2000	2500	6001	7500	1500	Human
HELQ_350720_pDONR221	ATGGAAAGAAAAAATTTAATATATTCCTTGCCAACAAGTGGTGGAAAAACCCTCGTGGCTGAGATTTTAATGCTGCAAGAACTGCTTTGCTGTCGGAAAGATGTTTTAATGATTCTTCCATATGTGGCAATTGTCCAAGAAAAGATTTCAGGTTTGTCAAGTTTTGGTATAGAACTCGGTTTCTTTGTTGAAGAATATGCTGGAAGCAAAGGAAGATTTCCTCCAACTAAAAGAAGGGAAAAGAAATCACTCTATATTGCCACTATTGAAAAAGGACATAGCTTGGTGAACTCCTTGATTGAAACTGGAAGAATTGACAGTCTGGGTCTGGTTGTTGTAGACGAGTTGCACATGATTGGTGAAGGAAGCCGTGGAGCTACACTGGAAATGACCCTAGCA…	350	720	1051	2160	1110	Human
FAN1_1509_pDONR221	ATGATGTCAGAAGGGAAACCTCCTGACAAAAAAAGGCCTCGTAGAAGCTTATCAATCAGCAAGAATAAGAAAAAAGCATCTAATTCTATTATTTCGTGTTTTAACAATGCACCACCTGCTAAACTTGCCTGCCCCGTTTGCAGTAAAATGGTGCCTAGATATGACTTAAACCGGCACCTTGATGAAATGTGTGCTAACAATGACTTCGTTCAAGTGGATCCAGGGCAGGTTGGCTTAATAAATTCAAATGTGTCTATGGTAGATTTAACCAGTGTTACCTTAGAAGATGTAACACCTAAGAAGTCACCACCACCAAAGACAAATTTAACCCCTGGCCAAAGTGATTCAGCAAAAAGGGAAGTAAAGCAGAAGATCAGTCCCTACTTTAAAAGTAATGAT…	1	509	4	1527	1524	Human
ERCC4_1500_pDONR221	ATGGAGTCAGGGCAGCCGGCTCGACGGATTGCCATGGCGCCGCTGCTGGAGTACGAGCGACAGCTGGTGCTGGAACTGCTCGACACTGACGGGCTAGTAGTGTGCGCCCGCGGGCTCGGCGCGGACCGGCTCCTCTACCACTTTCTCCAGCTGCACTGCCACCCAGCCTGCCTGGTGCTGGTGCTCAACACGCAGCCGGCCGAGGAGGAGTATTTTATCAATCAGCTGAAGATAGAAGGAGTTGAACACCTCCCTCGCCGTGTAACAAATGAAATCACAAGCAACAGTCGCTATGAAGTTTACACACAAGGTGGTGTTATATTTGCGACAAGTAGGATACTTGTGGTTGACTTCTTGACTGATAGAATACCTTCAGATTTAATTACTGGCATCTTGGTG…	1	500	4	1500	1497	Human
DIS3L2_200600_pDONR221	ATGGGAAGAGAGGATGGTGATGCACCGGTTACAAAAGATGAGACCACCTGCATTTCACAAGACACAAGAGCTTTATCGGAGAAATCCCTGCAAAGATCAGCAAAGGTGGTTTACATCTTGGAGAAAAAACATTCTCGAGCAGCAACCGGCTTCCTCAAACTCTTGGCTGATAAGAACAGCGAACTGTTTAGGAAATACGCCCTGTTTTCTCCCTCAGACCACCGAGTGCCTAGAATTTATGTGCCTCTCAAGGACTGTCCCCAGGACTTTGTGGCACGGCCTAAAGATTATGCCAACACACTGTTCATCTGCCGCATTGTGGACTGGAAGGAGGACTGCAATTTTGCCCTGGGGCAGCTGGCTAAGAGTCTTGGGCAGGCTGGTGAAATTGAGCCTGAA…	200	600	601	1800	1200	Human
BRCA2_2000_2500_pDONR221	ATGTCTGAAATAGAAGATAGTACCAAGCAAGTCTTTTCCAAAGTATTGTTTAAAAGTAACGAACATTCAGACCAGCTCACAAGAGAAGAAAATACTGCTATACGTACTCCAGAACATTTAATATCCCAAAAAGGCTTTTCATATAATGTGGTAAATTCATCTGCTTTCTCTGGATTTAGTACAGCAAGTGGAAAGCAAGTTTCCATTTTAGAAAGTTCCTTACACAAAGTTAAGGGAGTGTTAGAGGAATTTGATTTAATCAGAACTGAGCATAGTCTTCACTATTCACCTACGTCTAGACAAAATGTATCAAAAATACTTCCTCGTGTTGATAAGAGAAACCCAGAGCACTGTGTAAACTCAGAAATGGAAAAAACCTGCAGTAAAGAATTTAAATTA…	2000	2500	6001	7500	1500	Human
BLM_1_600_pDONR221	ATGGCTGCTGTTCCTCAAAATAATCTACAGGAGCAACTAGAACGTCACTCAGCCAGAACACTTAATAATAAATTAAGTCTTTCAAAACCAAAATTTTCAGGTTTCACTTTTAAAAAGAAAACATCTTCAGATAACAATGTATCTGTAACTAATGTGTCAGTAGCAAAAACACCTGTATTAAGAAATAAAGATGTTAATGTTACCGAAGACTTTTCCTTCAGTGAACCTCTACCCAACACCACAAATCAGCAAAGGGTCAAGGACTTCTTTAAAAATGCTCCAGCAGGACAGGAAACACAGAGAGGTGGATCAAAATCATTATTGCCAGATTTCTTGCAGACTCCGAAGGAAGTTGTATGCACTACCCAAAACACACCAACTGTAAAGAAATCCCGGGAT…	1	600	4	1800	1797	Human
AP5Z1_200600_pDONR221	ATGTCCACGCCCAGGGCCCGGCAGCCGGGCCCCGTCACCGAGGTGGACGGGGCGGTAGCCACAGACTTCTTCACGGTGCTCTCCAGCGGCCACCGCTTCACAGACGACCAGTGGCTGAACGTGCAGGCCTTCTCTATGCTGCGGGCGTGGCTGCTGCACAGCGGCCCCGAGGGCCCGGGCACCCTGGACACAGATGACAGGTCAGAGCAGGAGGGCTCCACTCTGTCGGTGATCTCCGCCACCTCCTCTGCCGGCCGCCTGCTGCCGCCCCGGGAGCGGCTTCGGGAGGTGGCCTTCGAGTACTGCCAGCGCCTCATTGAGCAAAGTAACCGACGAGCCCTGAGGAAGGGGGACTCCGACCTGCAGAAAGCTTGCCTGGTGGAGGCCGTGCTGGTGCTG…	200	600	601	1800	1200	Human
MLH1_1400_pDONR221	ATGTCGTTCGTGGCAGGGGTTATTCGGCGGCTGGACGAGACAGTGGTGAACCGCATCGCGGCGGGGGAAGTTATCCAGCGGCCAGCTAATGCTATCAAAGAGATGATTGAGAACTGTTTAGATGCAAAATCCACAAGTATTCAAGTGATTGTTAAAGAGGGAGGCCTGAAGTTGATTCAGATCCAAGACAATGGCACCGGGATCAGGAAAGAAGATCTGGATATTGTATGTGAAAGGTTCACTACTAGTAAACTGCAGTCCTTTGAGGATTTAGCCAGTATTTCTACCTATGGCTTTCGAGGTGAGGCTTTGGCCAGCATAAGCCATGTGGCTCATGTTACTATTACAACGAAAACAGCTGATGGAAAGTGTGCATACAGAGCAAGTTACTCAGATGGA…	1	400	4	1200	1197	Human
LIG4_1600_pDONR221	ATGGCTGCCTCACAAACTTCACAAACTGTTGCATCTCACGTTCCTTTTGCAGATTTGTGTTCAACTTTAGAACGAATACAGAAAAGTAAAGGACGTGCAGAAAAAATCAGACACTTCAGGGAATTTTTAGATTCTTGGAGAAAATTTCATGATGCTCTTCATAAGAACCACAAAGATGTCACAGACTCTTTTTATCCAGCAATGAGACTAATTCTTCCTCAGCTAGAAAGAGAGAGAATGGCCTATGGAATTAAAGAAACTATGCTTGCTAAGCTTTATATTGAGTTGCTTAATTTACCTAGAGATGGAAAAGATGCCCTCAAACTTTTAAACTACAGAACACCCACTGGAACTCATGGAGATGCTGGAGACTTTGCAATGATTGCATATTTTGTGTTG…	1	600	4	1800	1797	Human
HUWE1_3600_4375_pDONR221	ATGGCAGCCAACGTACTACTGCAGCTCTCCCGGGGGGACTCTGGGACCCGGGACACTGTTCTCAAGCTGCTACTGAATGGAGCCCGCCATCTGGGTTATACCCTTTGTAAACAAATAGGTACCCTGCTGGCCGAGCTGCGGGAATACAACCTCGAGCAGCAGCGGCGAGCCCAATGTGAAACCCTCTCTCCTGATGGCCTGCCTGAGGAGCAGCCACAGACCACCAAGCTGAAGGGCAAAATGCAGAGCAGGTTTGACATGGCTGAGAATGTGGTAATTGTGGCATCTCAGAAGCGACCTTTGGGTGGCCGGGAGCTCCAGCTGCCTTCTATGTCCATGTTGACATCCAAGACATCTACCCAGAAGTTCTTCTTGAGGGTACTACAGGTCATCATCCAG…	3600	4375	10801	13125	2325	Human
GEN1_1600_pDONR221	ATGGGAGTGAATGACTTGTGGCAAATTTTGGAGCCTGTTAAGCAACACATCCCCTTGCGTAATCTTGGTGGGAAAACCATTGCAGTTGATCTGAGTCTCTGGGTGTGTGAGGCACAGACAGTCAAAAAAATGATGGGCAGCGTCATGAAGCCCCACCTCAGGAACTTATTTTTTCGTATCTCATATTTAACACAAATGGATGTAAAACTGGTATTTGTTATGGAAGGGGAACCACCAAAGCTGAAAGCTGATGTCATAAGCAAGAGGAATCAGTCTCGGTATGGGTCTTCTGGAAAATCGTGGTCTCAGAAAACAGGGAGATCACATTTTAAATCAGTCTTAAGAGAGTGCCTCCATATGCTCGAATGCTTAGGAATCCCCTGGGTTCAGGCTGCTGGG…	1	600	4	1800	1797	Human
EXOSC10_1500_pDONR221	ATGGCGCCACCCAGTACCCGGGAGCCCAGGGTCCTGTCGGCGACCAGCGCAACCAAATCCGACGGAGAGATGGTGCTGCCAGGCTTCCCGGACGCCGACAGCTTTGTGAAGTTTGCTCTTGGGTCCGTGGTGGCAGTCACCAAGGCATCTGGGGGCCTACCACAGTTTGGCGATGAGTATGATTTTTACCGAAGTTTTCCTGGCTTCCAAGCATTTTGCGAAACACAGGGAGACAGGTTGCTTCAGTGCATGAGCAGAGTAATGCAGTACCATGGGTGTCGCAGCAACATTAAGGATCGAAGTAAAGTGACTGAGCTGGAAGACAAGTTTGATTTACTAGTTGATGCCAATGATGTAATTCTGGAGAGAGTGGGTATTTTACTGGATGAAGCCTCAGGT…	1	500	4	1500	1497	Human
ERCC4_500917_pDONR221	ATGCCTGAAGAACTGGAAGAGGAAGGAGATGTCGAGGAAGGATATCGTCGAGAAATAAGCAGTAGCCCAGAAAGCTGCCCGGAAGAAATTAAGCATGAAGAATTTGATGTAAATTTGTCATCGGATGCTGCTTTCGGAATCCTGAAAGAACCCCTCACTATCATCCATCCGCTTCTGGGTTGCAGCGACCCCTATGCTCTGACAAGGGTACTACATGAAGTGGAGCCAAGATACGTGGTTCTTTATGACGCAGAGCTAACCTTTGTTCGGCAGCTTGAAATTTACAGGGCGAGTAGGCCTGGGAAACCTCTGAGGGTTTACTTTCTTATATACGGAGGTTCAACTGAGGAACAACGCTATCTCACTGCTTTGCGGAAAGAAAAGGAAGCTTTTGAAAAA…	500	917	1501	2751	1251	Human
DIS3L2_1500_pDONR221	ATGAGCCATCCTGACTACAGAATGAACCTCCGGCCCCTGGGGACCCCCAGAGGTGTGTCTGCTGTGGCTGGTCCACATGACATTGGTGCTTCGCCAGGTGACAAAAAGTCAAAGAACAGGTCCACACGAGGGAAGAAAAAGAGCATATTTGAAACTTACATGTCCAAGGAGGATGTTTCAGAAGGCTTGAAGAGAGGAACACTCATCCAGGGTGTATTGAGAATTAATCCAAAGAAGTTTCATGAAGCCTTCATTCCTTCCCCGGATGGTGATCGAGACATTTTTATTGATGGGGTTGTTGCTCGTAATAGAGCCTTAAATGGGGATCTGGTGGTCGTGAAACTGCTTCCCGAGGAGCATTGGAAGGTAGTTAAACCAGAGAGCAATGACAAAGAAACA…	1	500	4	1500	1497	Human
BRCA2_1000_1500_pDONR221	ATGTCAAATCACAGTTTTGGAGGTAGCTTCAGAACAGCTTCAAATAAGGAAATCAAGCTCTCTGAACATAACATTAAGAAGAGCAAAATGTTCTTCAAAGATATTGAAGAACAATATCCTACTAGTTTAGCTTGTGTTGAAATTGTAAATACCTTGGCATTAGATAATCAAAAGAAACTGAGCAAGCCTCAGTCAATTAATACTGTATCTGCACATTTACAGAGTAGTGTAGTTGTTTCTGATTGTAAAAATAGTCATATAACCCCTCAGATGTTATTTTCCAAGCAGGATTTTAATTCAAACCATAATTTAACACCTAGCCAAAAGGCAGAAATTACAGAACTTTCTACTATATTAGAAGAATCAGGAAGTCAGTTTGAATTTACTCAGTTTAGAAAA…	1000	1500	3001	4500	1500	Human
BLM_420_1000_pDONR221	ATGGCCAGTCTTCTTGGCTCATTGTGGAGATACAGGCCTGATTCACTTGATGGCCCTATGGAGGGTGATTCCTGCCCTACAGGGAATTCTATGAAGGAGTTAAATTTTTCACACCTTCCCTCAAATTCTGTTTCTCCTGGGGACTGTTTACTGACTACCACCCTAGGAAAGACAGGATTCTCTGCCACCAGGAAGAATCTTTTTGAAAGGCCTTTATTCAATACCCATTTACAGAAGTCCTTTGTAAGTAGCAACTGGGCTGAAACACCAAGACTAGGAAAAAAAAATGAAAGCTCTTATTTCCCAGGAAATGTTCTCACAAGCACTGCTGTGAAAGATCAGAATAAACATACTGCTTCAATAAATGACTTAGAAAGAGAAACCCAACCTTCCTATGAT…	420	1000	1261	3000	1740	Human
ABL1_1500_pDONR221	ATGGGGCAGCAGCCTGGAAAAGTACTTGGGGACCAAAGAAGGCCAAGCTTGCCTGCCCTGCATTTTATCAAAGGAGCAGGGAAGAAGGAATCATCGAGGCATGGGGGTCCACACTGCAATGTTTTTGTGGAACATGAAGCCCTTCAGCGGCCAGTAGCATCTGACTTTGAGCCTCAGGGTCTGAGTGAAGCCGCTCGTTGGAACTCCAAGGAAAACCTTCTCGCTGGACCCAGTGAAAATGACCCCAACCTTTTCGTTGCACTGTATGATTTTGTGGCCAGTGGAGATAACACTCTAAGCATAACTAAAGGTGAAAAGCTCCGGGTCTTAGGCTATAATCACAATGGGGAATGGTGTGAAGCCCAAACCAAAAATGGCCAAGGCTGGGTCCCAAGCAAC…	1	500	4	1500	1497	Human
ABL1_6001150_pDONR221	ATGGGCGGCCTGAATGAAGATGAGCGCCTTCTCCCCAAAGACAAAAAGACCAACTTGTTCAGCGCCTTGATCAAGAAGAAGAAGAAGACAGCCCCAACCCCTCCCAAACGCAGCAGCTCCTTCCGGGAGATGGACGGCCAGCCGGAGCGCAGAGGGGCCGGCGAGGAAGAGGGCCGAGACATCAGCAACGGGGCACTGGCTTTCACCCCCTTGGACACAGCTGACCCAGCCAAGTCCCCAAAGCCCAGCAATGGGGCTGGGGTCCCCAATGGAGCCCTCCGGGAGTCCGGGGGCTCAGGCTTCCGGTCTCCCCACCTGTGGAAGAAGTCCAGCACGCTGACCAGCAGCCGCCTAGCCACCGGCGAGGAGGAGGGCGGTGGCAGCTCCAGCAAGCGCTTC…	600	1150	1801	3450	1650	Human
RAD50_multi_domain_pDONR221	ATGTCCCGGATCGAAAAGATGAGCATTCTGGGCGTGCGGAGTTTTGGAATAGAGGACAAAGATAAGCAAATTATCACTTTCTTCAGCCCCCTTACAATTTTGGTTGGACCCAATGGGGCGGGAAAGACGACCATCATTGAATGTCTAAAATATATTTGTACTGGAGATTTCCCTCCTGGAACCAAAGGAAATACATTTGTACACGATCCCAAGGTTGCTCAAGAAACAGATGTGAGAGCCCAGATTCGTCTGCAATTTCGTGATGTCAATGGAGAACTTATAGCTGTGCAAAGATCTATGGTGTGTACTCAGAAAAGCAAAAAGACAGAATTTAAAACTCTGGAAGGAGTCATTACTAGAACAAAGCATGGTGAAAAGGTCAGTCTGAGCTCTAAGTGT…	-	-	-	-	1533	Human
ERCC5_multi_domain_pDONR221	ATGGGGGTCCAGGGGCTCTGGAAGCTGCTGGAGTGCTCCGGGCGGCAGGTCAGCCCCGAAGCGCTGGAAGGGAAGATCCTGGCTGTTGATATTAGCATTTGGTTAAACCAAGCACTTAAAGGAGTCCGGGATCGCCATGGGAACTCAATAGAAAATCCTCATCTTCTCACTTTGTTTCATCGGCTCTGCAAACTCTTATTTTTTCGAATTCGTCCTATTTTTGTGTTTGATGGGGATGCTCCACTATTGAAGAAACAGACTTTGGTGAAGAGAAGGCAGAGAAAGGACTTAGCGTCCAGTGACTCCAGGAAAACGACAGAGAAGCTTCTGAAAACATTTTTGAAAAGACAAGCCATCAAAACTGCCTTCAGAAGCAAAAGAGATGAAGCACTACCCAGT…	-	-	-	-	2055	Human
FAN1_multi_domain_pDONR221	ATGATTTCGTGTTTTAACAATGCACCACCTGCTAAACTTGCCTGCCCCGTTTGCAGTAAAATGGTGCCTAGATATGACTTAAACCGGCACCTTGATGAAATGTGTGCTAACAATGACTTCGTTGAGTTGCAAGAACTCTCTGAAGTGCTTGAACTCCTTTCTGCTCCTGAACTAAAATCCCTAGCCAAGACCTTCCACTTGGTGAATCCCAATGGACAGAAACAGCAGCTGGTGGACGCCTTTCTCAAATTGGCCAAACAGCGTTCAGTCTGCGATCTTATCAGATATGCAGCAGCCACGCACATGCTGAGTGACATTTCTTCCGCAATGGCCAATGGGAACTGGGAAGAAGCTAAGGAGCTCGCTCAGTGTGCAAAAAGGGATTGGAACAGACTGAAA…	-	-	-	-	1521	Human
XPC_multi_domain_pDONR221	ATGGACTTTCCAAGTGACCTCAAGAAGGCACACCATCTGAAGAGAGGGGCTACCATGAATGAAGACAGCAATGAAGAAGAGGAAGAAAGTGAAAATGATTGGGAAGAGGTTGAAGAACTTAGTGAGCCTGTGCTGGGTGACGTGAGAGAAAGTACAGCCTTCTCTCGATCTCTTCTGCCTGTGAAGCCAGTGGAGATAGAGATTGAAACGCCAGAGCAGGCGAAGACAAGAGAAAGAAGTGAAAAGATAAAACTGGAGTTTGAGACATATCTTCGGAGGGCGATGAAACGTTTCAATAAAGGGGTCCATGAGGACACACACAAGGTTCACCTTCTCTGCCTGCTAGCAAATGGCTTCTATCGAAATAACATCTGCAGCCAGCCAGATCTGCATGCTATT…	-	-	-	-	1920	Human
LIG4_multi_domain_pDONR221	ATGCAGCGAAGTATCATGTCATTTTTCCACCCCAAGAAAGAGGGTAAAGCAAAGAAGCCTGAGAAGGAGGCATCCAATAGCAGCAGAGAGACGGAGCCCCCTCCAAAGGCGGCACTGAAGGAGTGGAATGGAGTGGTGTCCGAGAGTGACTCTCCGGTGAAGAGGCCAGGGAGGAAGGCGGCCCGGGTCCTGGGCAGCGAAGGGGAAGAGGAGGATGAAGCCCTTAGCCCTGCTAAAGGCCAGAAGCCTGCCCTGGACTGCTCACAGGTCTCCCCGCCCCGTCCTGCCACATCTCCTGAGATGATCCTGAAGCAGACGTTCTGCGAGGTTCCCGACCTGGACCGAATTATCCCCGTGCTGCTGGAGCACGGCCTGGAACGTCTCCCGGAGCACTGCAAG…	-	-	-	-	1554	Human
M_avi_1789_pDONR221	atgccgctgcatctgcatcgcgcggaacgcaccgatctgctggcggatggcctgggcgcgctgctggcggatccgccggcggatccgtttgcgccggaactggtggtggtgccggcgcgcggcgtggaacgctggctgagccagcgcctgagccatgtgctgggccgcgcggcggcggcgggctttccggcgggctgcgcgccgggctttcgcagcgcggcgccggcgcgc	-	-	-	-	231	Mycobacterium avium subsp. avium 2285 (S)	I548_1789
M_avi_1792_pDONR221	atgagcgtgacctatagccgcctggatggcaaacatctgctggaaagctggattccgctgctggcgctggcggcgcatgatccgggccgcgattggagcgcggtgtgcattggccgcatgcgccgcggccgcagcattcgcgtggaaggcctgggcccgccggatggcgatccggtggaagtgctgcgcgaactggtgaccatttatgatgcgggccgccgcgaaccgattccgctgccgattaaaaccagctatgcgtgggcggcggcgcgccatggcggcgatgatccggcggcggaagcgcgccgccgctggaaaaccagcgatcgctttccgggccgcacccgccgccgccgcacctgcggccgcggcggcgcggcgcgccgctggaccatt	-	-	-	-	396	Mycobacterium avium subsp. avium 2285 (S)	I548_1792
M_avi_1790_pDONR221	atgtgcgcgggcgtgagctttcgcagcccgggcagcctgattgcggaaattgcgggcaccgcggatgatgatccgtggagcccggaagcgatggcgtggccgctgctggaagcgattgatcatagcctggatgaaccgtggtgccgcccgctggcgacccatgtgggccattttcataccggcgcggaagcggaactgcgccgcggccgccgctatgaagtggcgcgccgcctggcgggcctgtttgcgagctatgcgcgccagcgcccgcagctgctgattgattggctgggcggcgatccgggcgatctggatgaagatctgcgctggcagccggaactgtggcgcgcgctggtgagccgcgtggcggcggatccgccgcatattcgccatgcgaaa…	-	-	-	-	792	Mycobacterium avium subsp. avium 2285 (S)	I548_1790
M_avi_recC_pDONR221	atgcgcccgcagggccgcgcgctgaccgatgatgatcgcagcgtgcagattcataactgccatggcccggcgcgccaggtggatgtgctgcgcgaagtgctgctgggcctgctggcggatgatccgaccctggaaccgcgcgatattctggtgatgtgcccggatattgaaacctatgcgccgctgattgtggcggattttggcctgggcgatgtggtgcatggcgcgcatccggcgcatcagctgcgcgtgcgcctggcggatcgcagcctggtgcagaccaacagcctgctggcggtggcgagccagctgctgggcctggcgggcggccgcgtgaccgcgaccgaagtgctgaacctggcgcaggcggcgccggtgcgcgcgcgctttggctttacc…	-	-	-	-	1833	Mycobacterium avium subsp. avium 2285 (S)	recC, I548_1791
phage_T5_D13_pDONR221	atgagcaaaattaccattaaaaccctgaaatttagcaacgtgatgagctatggcaaagatattgtgattcattttgataaaaacccggtgacccagctgattggcggcaacggcctgggcaaaagcaccattgcgaccgtgattgaagaactgttttataacaaaaacagccgcggcattaaaaaagatgcgctgtttagctggaacgcgccgaaaaaagaatatgatatgcatgcgtattttagcaaagatgaagatgaatatgaactgcataaagtggtgaaaagcaccgcgaaagtgaccctgattaaaaacggcgaagatattagcggccataccgcgacccagacctataaaatgattgaagaaattatgggcggcgattttcagacctttacc…	-	-	-	-	1836	Enterobacteria phage T5 (Bacteriophage T5)	D13, T5p126
phage_T5_D15_pDONR221	atgagcaaaagctggggcaaatttattgaagaagaagaagcggaaatggcgagccgccgcaacctgatgattgtggatggcaccaacctgggctttcgctttaaacataacaacagcaaaaaaccgtttgcgagcagctatgtgagcaccattcagagcctggcgaaaagctatagcgcgcgcaccaccattgtgctgggcgataaaggcaaaagcgtgtttcgcctggaacatctgccggaatataaaggcaaccgcgatgaaaaatatgcgcagcgcaccgaagaagaaaaagcgctggatgaacagttttttgaatatctgaaagatgcgtttgaactgtgcaaaaccacctttccgacctttaccattcgcggcgtggaagcggatgatatggcg…	-	-	-	-	873	Enterobacteria phage T5 (Bacteriophage T5)	D15, T5p128
phage_T5_exo2_pDONR221	atgattgaaagctggctggaactgcgcaacatgagcaaaattaccattaaaaccctgaaatttagcaacgtgatgagctatggcaaagatattgtgattcattttgataaaaacccggtgacccagctgattggcggcaacggcctgggcaaaagcaccattgcgaccgtgattgaagaactgttttataacaaaaacagccgcggcattaaaaaagatgcgctgtttagctggaacgcgccgaaaaaagaatatgatatgcatgcgtattttagcaaagatgaagatgaatatgaactgcataaagtggtgaaaagcaccgcgaaagtgaccctgattaaaaacggcgaagatattagcggccataccgcgacccagacctataaaatgattgaagaa…	-	-	-	-	1866	Enterobacteria phage T5 (Bacteriophage T5)	exo2
phage_T5_exo5_pDONR221	atggcgagccgccgcaacctgatgattgtggatggcaccaacctgggctttcgctttaaacataacaacagcaaaaaaccgtttgcgagcagctatgtgagcaccattcagagcctggcgaaaagctatagcgcgcgcaccaccattgtgctgggcgataaaggcaaaagcgtgtttcgcctggaacatctgccggaatataaaggcaaccgcgatgaaaaatatgcgcagcgcaccgaagaagaaaaagcgctggatgaacagttttttgaatatctgaaagatgcgtttgaactgtgcaaaaccacctttccgacctttaccattcgcggcgtggaagcggatgatatggcggcgtatattgtgaaactgattggccatctgtatgatcatgtgtgg…	-	-	-	-	828	Enterobacteria phage T5 (Bacteriophage T5)	exo5
C_jej_1057c_pDONR221	atgagctttgaagaaaacctgaaacatgcgaacgaaagcctggaaaaactgaacaaccaggaactggcgctggatgaaagcgtgaaaatttataaagaaggcctggaaagcattaaaaaagcgcgcctggaactggaaaaagcgaaactggaagtggaacagattgatgaa	-	-	-	-	171	Campylobacter jejuni subsp. jejuni serotype O:2 (strain NCTC 11168)	Cj1057c
E_coli_recE_pDONR221	atgagcaccaaaccgctgtttctgctgcgcaaagcgaaaaaaagcagcggcgaaccggatgtggtgctgtgggcgagcaacgattttgaaagcacctgcgcgaccctggattatctgattgtgaaaagcggcaaaaaactgagcagctattttaaagcggtggcgaccaactttccggtggtgaacgatctgccggcggaaggcgaaattgattttacctggagcgaacgctatcagctgagcaaagatagcatgacctgggaactgaaaccgggcgcggcgccggataacgcgcattatcagggcaacaccaacgtgaacggcgaagatatgaccgaaattgaagaaaacatgctgctgccgattagcggccaggaactgccgattcgctggctggcg…	-	-	-	-	2598	Escherichia coli (strain K12)	recE, b1350, JW1344
phage T5_12_pDONR221	atgcgcattctgtttagcgcggatcatcatattaaactgggccaggataaagtgccgaaagaatggcagaaacgccgctttctgatgctgggcgaacgcctgaacgatatttttcataaccataactgcgatctgcatattgcgggcggcgatattctggatgtggcggatccgagcagcgaagaaattgaactgctggaacagtttatgagccgcctggatcatccgggcaaaatttttaccggcaaccatgaaatgctgaccaaaaccattagctgcctgtatcattatgcgggcgtgattaacaaagtgaccagcggcaaatgggaagtgattaccaaaccgtatcgcagcccggaatttgatattgtgccgtatgatgaaattcataaagcgaaa…	-	-	-	-	975	Enterobacteria phage T5 (Bacteriophage T5)	D12
E_coli_exoX_pDONR221	atgctgcgcattattgataccgaaacctgcggcctgcagggcggcattgtggaaattgcgagcgtggatgtgattgatggcaaaattgtgaacccgatgagccatctggtgcgcccggatcgcccgattagcccgcaggcgatggcgattcatcgcattaccgaagcgatggtggcggataaaccgtggattgaagatgtgattccgcattattatggcagcgaatggtatgtggcgcataacgcgagctttgatcgccgcgtgctgccggaaatgccgggcgaatggatttgcaccatgaaactggcgcgccgcctgtggccgggcattaaatatagcaacatggcgctgtataaaacccgcaaactgaacgtgcagaccccgccgggcctgcatcat…	-	-	-	-	660	Escherichia coli (strain K12)	exoX, yobC, b1844, JW1833
E_coli_xseB_pDONR221	atgccgaaaaaaaacgaagcgccggcgagctttgaaaaagcgctgagcgaactggaacagattgtgacccgcctggaaagcggcgatctgccgctggaagaagcgctgaacgaatttgaacgcggcgtgcagctggcgcgccagggccaggcgaaactgcagcaggcggaacagcgcgtgcagattctgctgagcgataacgaagatgcgagcctgaccccgtttaccccggataacgaa	-	-	-	-	240	Escherichia coli (strain K12)	xseB, yajE, b0422, JW0412
E_coli_orn_pDONR221	atgagcgcgaacgaaaacaacctgatttggattgatctggaaatgaccggcctggatccggaacgcgatcgcattattgaaattgcgaccctggtgaccgatgcgaacctgaacattctggcggaaggcccgaccattgcggtgcatcagagcgatgaacagctggcgctgatggatgattggaacgtgcgcacccataccgcgagcggcctggtggaacgcgtgaaagcgagcaccatgggcgatcgcgaagcggaactggcgaccctggaatttctgaaacagtgggtgccggcgggcaaaagcccgatttgcggcaacagcattggccaggatcgccgctttctgtttaaatatatgccggaactggaagcgtattttcattatcgctatctggat…	-	-	-	-	543	Escherichia coli (strain K12)	orn, o204a, yjeR, b4162, JW5740
E_coli_xthA_pDONR221	atgaaatttgtgagctttaacattaacggcctgcgcgcgcgcccgcatcagctggaagcgattgtggaaaaacatcagccggatgtgattggcctgcaggaaaccaaagtgcatgatgatatgtttccgctggaagaagtggcgaaactgggctataacgtgttttatcatggccagaaaggccattatggcgtggcgctgctgaccaaagaaaccccgattgcggtgcgccgcggctttccgggcgatgatgaagaagcgcagcgccgcattattatggcggaaattccgagcctgctgggcaacgtgaccgtgattaacggctattttccgcagggcgaaagccgcgatcatccgattaaatttccggcgaaagcgcagttttatcagaacctgcag…	-	-	-	-	804	Escherichia coli (strain K12)	xthA, xth, b1749, JW1738
E_coli_sbcB_pDONR221	atgatgaacgatggcaaacagcagagcacctttctgtttcatgattatgaaacctttggcacccatccggcgctggatcgcccggcgcagtttgcggcgattcgcaccgatagcgaatttaacgtgattggcgaaccggaagtgttttattgcaaaccggcggatgattatctgccgcagccgggcgcggtgctgattaccggcattaccccgcaggaagcgcgcgcgaaaggcgaaaacgaagcggcgtttgcggcgcgcattcatagcctgtttaccgtgccgaaaacctgcattctgggctataacaacgtgcgctttgatgatgaagtgacccgcaacattttttatcgcaacttttatgatccgtatgcgtggagctggcagcatgataacagc…	-	-	-	-	1425	Escherichia coli (strain K12)	sbcB, cpeA, xonA, b2011, JW1993
E_coli_xseA_pDONR221	atgctgccgagccagagcccggcgatttttaccgtgagccgcctgaaccagaccgtgcgcctgctgctggaacatgaaatgggccaggtgtggattagcggcgaaattagcaactttacccagccggcgagcggccattggtattttaccctgaaagatgataccgcgcaggtgcgctgcgcgatgtttcgcaacagcaaccgccgcgtgacctttcgcccgcagcatggccagcaggtgctggtgcgcgcgaacattaccctgtatgaaccgcgcggcgattatcagattattgtggaaagcatgcagccggcgggcgaaggcctgctgcagcagaaatatgaacagctgaaagcgaaactgcaggcggaaggcctgtttgatcagcagtataaaaaa…	-	-	-	-	1368	Escherichia coli (strain K12)	xseA, b2509, JW2493
E_coli_recD_pDONR221	atgaaactgcagaaacagctgctggaagcggtggaacataaacagctgcgcccgctggatgtgcagtttgcgctgaccgtggcgggcgatgaacatccggcggtgaccctggcggcggcgctgctgagccatgatgcgggcgaaggccatgtgtgcctgccgctgagccgcctggaaaacaacgaagcgagccatccgctgctggcgacctgcgtgagcgaaattggcgaactgcagaactgggaagaatgcctgctggcgagccaggcggtgagccgcggcgatgaaccgaccccgatgattctgtgcggcgatcgcctgtatctgaaccgcatgtggtgcaacgaacgcaccgtggcgcgcttttttaacgaagtgaaccatgcgattgaagtggat…	-	-	-	-	1824	Escherichia coli (strain K12)	recD, hopE, b2819, JW2787
S_aureus_nuc_pDONR221	atgctggtgatgaccgaatatctgctgagcgcgggcatttgcatggcgattgtgagcattctgctgattggcatggcgattagcaacgtgagcaaaggccagtatgcgaaacgcttttttttttttgcgaccagctgcctggtgctgaccctggtggtggtgagcagcctgagcagcagcgcgaacgcgagccagaccgataacggcgtgaaccgcagcggcagcgaagatccgaccgtgtatagcgcgaccagcaccaaaaaactgcataaagaaccggcgaccctgattaaagcgattgatggcgataccgtgaaactgatgtataaaggccagccgatgacctttcgcctgctgctggtggataccccggaaaccaaacatccgaaaaaaggcgtg…	-	-	-	-	693	Staphylococcus aureus	nuc
phage T7_3_pDONR221	atggcgggctatggcgcgaaaggcattcgcaaagtgggcgcgtttcgcagcggcctggaagataaagtgagcaaacagctggaaagcaaaggcattaaatttgaatatgaagaatggaaagtgccgtatgtgattccggcgagcaaccatacctataccccggattttctgctgccgaacggcatttttgtggaaaccaaaggcctgtgggaaagcgatgatcgcaaaaaacatctgctgattcgcgaacagcatccggaactggatattcgcattgtgtttagcagcagccgcaccaaactgtataaaggcagcccgaccagctatggcgaattttgcgaaaaacatggcattaaatttgcggataaactgattccggcggaatggattaaagaaccg…	-	-	-	-	447	Enterobacteria phage T7 (Bacteriophage T7)
phage T7_6_pDONR221	atggcgctgctggatctgaaacagttttatgaactgcgcgaaggctgcgatgataaaggcattctggtgatggatggcgattggctggtgtttcaggcgatgagcgcggcggaatttgatgcgagctgggaagaagaaatttggcatcgctgctgcgatcatgcgaaagcgcgccagattctggaagatagcattaaaagctatgaaacccgcaaaaaagcgtgggcgggcgcgccgattgtgctggcgtttaccgatagcgtgaactggcgcaaagaactggtggatccgaactataaagcgaaccgcaaagcggtgaaaaaaccggtgggctattttgaatttctggatgcgctgtttgaacgcgaagaattttattgcattcgcgaaccgatgctg…	-	-	-	-	900	Enterobacteria phage T7 (Bacteriophage T7)
SWI5_HUM_FL_pDONR221	ATGCAGCGGCGTGGCCAGAGGGACCTGTGGCGTCACAACAAAAGCTGCGCACGCAACCGCTGTCCCCGCCCACCTCGGGAGAGGGGCGGGGCCGGCTTTCCTTGGGTGCGCGCGCAGCTTTCTGTGCGCCAGTTCACACTCCGGGTCAGAGTTCCTGGCCCGGTGCACCTGAGAGGTCGCTCTCCGACTCCCGCGCTGGACCCTCTTGCGCCATTGAACCCCCTGATCCGGGGGCCTCGGACCCCAGGGCTCAGGAGATGGATCCAGTCCCTGGCGCTCCTACTTCCCAACTGCTCCTCCTCCCGCATCCCCACAGTACCCCGTCCTCACAGCGGGCTGTGGGTCCAATCAGACTTTCCCCTCGGATTCCTCTCTAGGACTGAACCAAGACTTACCCGA…	-	-	-	-	708	Human	ENSG00000175854	ENST00000320188
NABP1_HUM_FL_pDONR221	ATGAATAGGGTCAACGACCCACTTATTTTTATAAGAGATATTAAGCCCGGACTGAAAAACTTAAATGTCGTCTTTATTGTCCTGGAGATAGGACGCGTGACCAAAACCAAAGACGGCCATGAAGTGAGATCGTGCAAAGTAGCAGATAAAACGGGCAGCATCACTATTTCCGTGTGGGATGAGATCGGAGGTCTTATACAGCCAGGGGATATTATTCGGTTGACCAGAGGGTATGCATCCATGTGGAAAGGATGTCTGACACTTTATACTGGAAGGGGTGGTGAACTTCAAAAAATTGGGGAATTTTGTATGGTTTATTCAGAAGTGCCAAATTTCAGTGAACCCAACCCAGATTATCGAGGACAGCAGAACAAAGGGGCACAGAGTGAACAGAAGAAT…	-	-	-	-	615	Human	ENSG00000173559	ENST00000425611
EXO5_HUM_FL_pDONR221	ATGGCAGAGACAAGAGAAGAGGAGACAGTGTCAGCAGAAGCCTCAGGGTTCTCAGACTTGAGTGACTCAGAGTTCCTGGAGTTTCTGGACCTAGAAGATGCCCAAGAGTCAAAGGCTTTAGTTAACATGCCTGGCCCATCTTCTGAATCCCTTGGGAAGGATGACAAACCCATAAGCTTACAAAACTGGAAAAGAGGATTGGATATATTATCACCCATGGAGAGATTCCACCTTAAATATTTATATGTCACTGACCTGGCTACTCAGAACTGGTGTGAACTGCAAACAGCATATGGGAAGGAGCTTCCTGGTTTCTTGGCACCTGAGAAGGCAGCTGTGTTGGACACTGGTGCCAGCATACACCTAGCTAGAGAACTAGAACTTCATGATCTTGTGACT…	-	-	-	-	1122	Human	ENSG00000164002	ENST00000296380
POLR2K_HUM_FL_pDONR221	ATGGACACCCAGAAGGACGTTCAACCTCCAAAGCAGCAACCAATGATATATATCTGTGGAGAGTGTCACACAGAAAATGAAATAAAATCTAGGGATCCAATCAGATGCAGAGAATGTGGATACAGAATAATGTACAAGAAAAGGACTAAAAGATGTATCCTTTTAACGATGCTTTCTAAATATGAGTTAGGAGGAAATGAA	-	-	-	-	204	Human	ENSG00000147669	ENST00000522439
CETN2_HUM_FL_pDONR221	ATGGCCTCCAACTTTAAGAAGGCAAACATGGCATCAAGTTCTCAGCGAAAAAGAATGAGCCCTAAGCCTGAGCTTACTGAAGAGCAAAAGCAGGAGATCCGGGAAGCTTTTGATCTTTTCGATGCGGATGGAACTGGCACCATAGATGTTAAAGAACTGAAGGTGGCAATGAGGGCCCTGGGCTTTGAACCCAAGAAAGAAGAAATTAAGAAAATGATAAGTGAAATTGATAAGGAAGGGACAGGAAAAATGAACTTTGGTGACTTTTTAACTGTGATGACCCAGAAAATGTCTGAGAAAGATACTAAAGAAGAAATCCTGAAAGCTTTCAAGCTCTTTGATGATGATGAAACTGGGAAGATTTCGTTCAAAAATCTGAAACGCGTGGCCAAGGAGTTG…	-	-	-	-	519	Human	ENSG00000147400	ENST00000370277
NEIL1_HUM_FL_pDONR221	ATGCCTGAGGGCCCCGAGCTGCACCTGGCCAGCCAGTTTGTGAATGAGGCCTGCAGGGCGCTGGTGTTCGGCGGCTGCGTGGAGAAGTCCTCTGTCAGCCGCAACCCTGAGGTGCCCTTTGAGAGCAGTGCCTACCGCATCTCAGCTTCAGCCCGCGGCAAGGAGCTGCGCCTGATACTGAGCCCTCTGCCTGGGGCCCAGCCCCAACAGGAGCCACTGGCCCTGGTCTTCCGCTTCGGCATGTCCGGCTCTTTTCAGCTGGTGCCCCGCGAGGAGCTGCCACGCCATGCCCACCTGCGCTTTTACACGGCCCCGCCTGGCCCCCGGCTCGCCCTATGTTTCGTGGACATCCGCCGGTTCGGCCGCTGGGACCTTGGGGGAAAGTGGCAGCCGGGCCGC…	-	-	-	-	1173	Human	ENSG00000140398	ENST00000355059
XRCC3_HUM_FL_pDONR221	ATGGATTTGGATCTACTGGACCTGAATCCCAGAATTATTGCTGCAATTAAGAAAGCCAAACTGAAATCGGTAAAGGAGGTTTTACACTTTTCTGGACCAGACTTGAAGAGACTGACCAACCTCTCCAGCCCCGAGGTCTGGCACTTGCTGAGAACGGCCTCCTTACACTTGCGGGGAAGCAGCATCCTTACAGCACTGCAGCTGCACCAGCAGAAGGAGCGGTTCCCCACGCAGCACCAGCGCCTGAGCCTGGGCTGCCCGGTGCTGGACGCGCTGCTCCGCGGTGGCCTGCCCCTGGACGGCATCACTGAGCTGGCCGGACGCAGCTCGGCAGGGAAGACCCAGCTGGCGCTGCAGCTCTGCCTGGCTGTGCAGTTCCCGCGGCAGCACGGAGGCCTG…	-	-	-	-	1041	Human	ENSG00000126215	ENST00000352127
FANCL_HUM_FL_pDONR221	ATGGCGGTGACGGAAGCGAGCCTGTTGCGCCAGTGCCCCCTGCTTCTGCCCCAGAACCGGTCGAAAACCGTGTATGAGGGATTCATCTCGGCTCAGGGAAGAGACTTCCACCTTAGGATAGTGTTGCCTGAAGATTTACAACTGAAGAATGCAAGATTATTATGTAGTTGGCAGCTGAGAACAATACTTAGTGGATACCATCGAATAGTACAACAGAGAATGCAGCACTCTCCTGATCTAATGAGCTTTATGATGGAGTTGAAGATGCTTTTGGAAGTTGCCTTAAAGAATAGACAAGAGCTGTATGCACTACCTCCTCCTCCCCAGTTCTACTCAAGCCTTATTGAAGAGATAGGAACTCTTGGTTGGGATAAACTTGTGTATGCGGATACCTGCTTC…	-	-	-	-	1143	Human	ENSG00000115392	ENST00000402135
NEIL3_HUM_FL_pDONR221	ATGGTGGAAGGACCAGGCTGTACTCTGAATGGAGAGAAGATTCGCGCGCGGGTGCTCCCGGGCCAGGCGGTGACCGGCGTGCGGGGAAGCGCTCTGCGGAGTCTGCAGGGCCGCGCCTTGCGGCTCGCAGCCTCCACGGTTGTGGTCTCCCCGCAGGCTGCTGCACTGAATAATGATTCCAGCCAGAATGTCTTGAGCCTGTTTAATGGATATGTTTACAGTGGCGTGGAAACTTTGGGGAAGGAGCTCTTTATGTACTTTGGACCAAAAGCTTTACGGATTCATTTCGGAATGAAAGGCTTCATCATGATTAATCCACTTGAGTATAAATATAAAAATGGAGCTTCTCCTGTTTTGGAAGTGCAGCTCACCAAAGATTTGATTTGTTTCTTTGACTCA…	-	-	-	-	1818	Human	ENSG00000109674	ENST00000264596
RPA3_HUM_FL_pDONR221	ATGGTGGACATGATGGACTTGCCCAGGTCGCGCATCAACGCCGGCATGCTAGCTCAATTCATCGACAAGCCTGTCTGCTTCGTAGGGAGGCTGGAAAAGATTCATCCCACCGGAAAAATGTTTATTCTTTCAGATGGAGAAGGAAAAAATGGAACCATCGAGTTGATGGAACCCCTTGATGAAGAAATCTCTGGAATTGTGGAAGTGGTTGGAAGAGTAACCGCCAAGGCCACCATCTTGTGTACATCTTATGTCCAGTTTAAAGAAGATAGCCATCCTTTTGATCTTGGACTTTACAATGAAGCTGTGAAAATTATCCATGACTTCCCTCAGTTTTATCCTTTAGGGATTGTGCAACATGAT	-	-	-	-	366	Human	ENSG00000106399	ENST00000223129
ATXN3_HUM_FL_pDONR221	ATGGAGTCCATCTTCCACGAGAAACAAGAAGGCTCACTTTGTGCTCAACATTGCCTGAATAACTTATTGCAAGGAGAATATTTTAGCCCTGTGGAATTATCCTCAATTGCACATCAGCTGGATGAGGAGGAGAGGATGAGAATGGCAGAAGGAGGAGTTACTAGTGAAGATTATCGCACGTTTTTACAGCAGCCTTCTGGAAATATGGATGACAGTGGTTTTTTCTCTATTCAGGTTATAAGCAATGCCTTGAAAGTTTGGGGTTTAGAACTAATCCTGTTCAACAGTCCAGAGTATCAGAGGCTCAGGATCGATCCTATAAATGAAAGATCATTTATATGCAATTATAAGGAACACTGGTTTACAGTTAGAAAATTAGGAAAACAGTGGTTTAACTTG…	-	-	-	-	1113	Human	ENSG00000066427	ENST00000545170
GenEZ ORF Clone: OHu12315C	ATGTTCTACACACATGTGCTTATGAGTAAACGAGGGCCATTGGCCAAAATATGGCTTGCAGCTCACTGGGAGAAGAAACTCACAAAGGCCCATGTATTTGAATGTAATCTAGAGATAACCATTGAAAAAATTCTTTCACCCAAGGTGAAAATAGCACTTCGAACTTCAGGACACCTTCTTTTGGGAGTTGTTCGAATCTATAACAGGAAGGCAAAATATCTTTTGGCAGATTGCAGTGAAGCATTTCTTAAAATGAAGATGACATTTTGCCCAGGACTGGTTGACCTTCCAAAAGAGAATTTTGAAGCATCTTACAATGCTATCACATTGCCAGAAGAATTTCATGATTTTGACACCCAAAATATGAATGCTATTGATGTTTCAGAACACTTTACTCAG…	-	-	-	-	1671	Human	ENSG00000244588	ENST00000409241
GenEZ ORF Clone: OHu18192C	ATGGCTGAGAATGGCGAGAGCAGCGGCCCCCCGCGCCCCTCCCGCGGCCCTGCTGCGGCCCAAGGCTCGGCTGCTGCCCCGGCTGAGCCTAAAATCATCAAAGTCACGGTGAAGACTCCCAAAGAGAAAGAGGAGTTCGCGGTGCCCGAGAACAGCTCGGTTCAGCAGTTTAAGGAAGCGATTTCGAAACGCTTCAAATCCCAAACCGATCAGCTAGTGCTGATTTTTGCCGGAAAAATCTTAAAAGATCAAGATACCTTGATCCAGCATGGCATCCATGATGGGCTGACTGTTCACCTTGTCATCAAAAGCCAGAACCGACCTCAGGGCCAGTCCACGCAGCCTAGCAATGCCGCGGGAACTAACACTACCTCGGCGTCGACTCCCAGGAGTAACTCC…	-	-	-	-	1875	Human	ENSG00000188021	ENST00000338222
GenEZ ORF Clone: OHu23325C	ATGTCTCGGGAGTCGGATGTTGAGGCTCAGCAGTCTCATGGCAGCAGTGCCTGTTCACAGCCCCATGGCAGCGTTACCCAGTCCCAAGGCTCCTCCTCACAGTCCCAGGGCATATCCAGCTCCTCTACCAGCACGATGCCAAACTCCAGCCAGTCCTCTCACTCCAGCTCTGGGACACTGAGCTCCTTAGAGACAGTGTCCACTCAGGAACTCTATTCTATTCCTGAGGACCAAGAACCTGAGGACCAAGAACCTGAGGAGCCTACCCCTGCCCCCTGGGCTCGATTATGGGCCCTTCAGGATGGATTTGCCAATCTTGAGACAGAGTCTGGCCATGTTACCCAATCTGATCTTGAACTCCTGCTGTCATCTGATCCTCCTGCCTCAGCCTCCCAAAGT…	-	-	-	-	1761	Human	ENSG00000183765	ENST00000382580
GenEZ ORF Clone: OHu04471C	ATGAAGTGCCTGGTCACGGGCGGCAACGTGAAGGTGCTCGGCAAGGCCGTCCACTCCCTGTCCCGCATCGGGGACGAGCTCTACCTGGAACCCTTGGAGGACGGGCTCTCCCTCCGGACGGTGAACTCCTCCCGCTCTGCCTATGCCTGCTTTCTCTTTGCCCCGCTCTTCTTCCAGCAATACCAGGCAGCCACCCCTGGTCAGGACCTGCTGCGCTGTAAGATCCTGATGAAGTCTTTCCTGTCTGTCTTCCGCTCACTGGCGATGCTGGAGAAGACGGTGGAAAAATGCTGCATCTCCCTGAATGGCCGGAGCAGCCGCCTGGTGGTCCAGCTGCATTGCAAGTTCGGGGTGCGGAAGACTCACAACCTGTCCTTCCAGGACTGTGAGTCCCTGCAG…	-	-	-	-	1176	Human	ENSG00000172613	ENST00000307980
GenEZ ORF Clone: OHu21550C	ATGGCTCTACCCAAAGACGCCATCCCCTCGCTGTCCGAGTGCCAGTGCGGGATCTGCATGGAAATCCTCGTGGAGCCCGTCACCCTCCCGTGTAACCACACGCTGTGTAAACCGTGCTTCCAGTCGACCGTCGAAAAGGCGAGTTTATGCTGTCCCTTCTGTCGCCGCCGGGTATCGTCGTGGACTCGGTACCATACCCGAAGAAATTCTCTCGTCAACGTGGAACTGTGGACGATAATTCAAAAACACTATCCCAGGGAGTGCAAGCTTAGAGCGTCTGGCCAAGAATCAGAGGAAGTGGCTGATGACTATCAGCCAGTTCGTCTGCTCAGTAAACCTGGGGAACTGAGAAGAGAATATGAAGAGGAAATAAGCAAGGTGGCGGCAGAGCGACGGGCC…	-	-	-	-	1716	Human	ENSG00000163961	ENST00000318037
GenEZ ORF Clone: OHu31586C	ATGCCAGGACGTTCCAGTTCAAATTCAGGTTCAACTGGTTTCATCTCCTTCAGTGGTGTAGAGTCTGCTCTCTCCTCCTTGAAAAACTTCCAAGCCTGTATCAACTCTGGTATGGACACAGCTTCTAGTGTTGCTTTGGATCTTGTGGAAAGTCAGACTGAAGTGAGTAGTGAATATAGTATGGACAAGGCAATGGTTGAATTTGCTACATTGGATCGGCAACTAAACCATTATGTAAAGGCTGTTCAATCTACAATAAATCATGTGAAAGAAGAACGTCCAGAAAAAATACCAGATTTAAAATTATTGGTAGAGAAGAAATTTTTGGCTTTACAGAGCAAGAATTCTGATGCAGACTTTCAAAATAATGAAAAATTTGTACAGTTTAAACAACAGCTG…	-	-	-	-	744	Human	ENSG00000156831	ENST00000287437
GenEZ ORF Clone: OHu09979C	ATGCCAGAAGGGCCGTTGGTGAGGAAATTTCACCATTTGGTCTCCCCCTTTGTGGGTCAGCAGGTGGTCAAGACAGGGGGCAGCAGTAAGAAGCTACAGCCCGCCAGCCTGCAGTCTCTGTGGCTCCAGGACACCCAGGTCCATGGAAAGAAATTATTCCTTAGATTTGATCTAGATGAAGAAATGGGGCCCCCTGGCAGCAGCCCAACACCAGAGCCTCCACAAAAAGAAGTGCAGAAGGAAGGGGCTGCGGACCCAAAGCAGGTCGGGGAGCCCAGCGGGCAGAAGACCCTTGATGGATCCTCACGGTCTGCAGAGCTCGTCCCCCAGGGCGAGGATGATTCTGAGTATTTGGAGAGAGACGCCCCTGCAGGAGATGCTGGGAGGTGGCTGCGTGTC…	-	-	-	-	999	Human	ENSG00000154328	ENST00000284503
GenEZ ORF Clone: OHu27390C	ATGGAAGCGGAGAACGCGGGCAGCTATTCCCTTCAGCAAGCTCAAGCTTTTTATACGTTTCCATTTCAACAACTGATGGCTGAAGCTCCTAATATGGCAGTTGTGAATGAACAGCAAATGCCAGAAGAAGTTCCAGCCCCAGCTCCTGCTCAGGAACCAGTGCAAGAGGCTCCAAAAGGAAGAAAAAGAAAACCCAGAACAACAGAACCAAAACAACCAGTGGAACCCAAAAAACCTGTTGAGTCAAAAAAATCTGGCAAGTCTGCAAAATCAAAAGAAAAACAAGAAAAAATTACAGACACATTTAAAGTAAAAAGAAAAGTAGACCGTTTTAATGGTGTTTCAGAAGCTGAACTTCTGACCAAGACTCTCCCCGATATTTTGACCTTCAATCTGGAC…	-	-	-	-	1233	Human	ENSG00000139372	ENST00000392872
GenEZ ORF Clone: OHu19368C	ATGGCCGAGAGTGGTGAAAGCGGCGGTCCTCCGGGCTCCCAGGATAGCGCCGCCGGAGCCGAAGGTGCTGGCGCCCCCGCGGCCGCTGCCTCCGCGGAGCCCAAAATCATGAAAGTCACCGTGAAGACCCCGAAGGAAAAGGAGGAATTCGCCGTGCCCGAGAATAGCTCCGTCCAGCAGTTTAAGGAAGAAATCTCTAAACGTTTTAAATCACATACTGACCAACTTGTGTTGATATTTGCTGGAAAAATTTTGAAAGATCAAGATACCTTGAGTCAGCATGGAATTCATGATGGACTTACTGTTCACCTTGTCATTAAAACACAAAACAGGCCTCAGGATCATTCAGCTCAGCAAACAAATACAGCTGGAAGCAATGTTACTACATCATCAACTCCT…	-	-	-	-	1770	Human	ENSG00000135018	ENST00000376395
GenEZ ORF Clone: OHu24336C	ATGACACCGCTCGTCTCCCGCCTGAGTCGTCTGTGGGCCATCATGAGGAAGCCACGAGCAGCCGTGGGAAGTGGTCACAGGAAGCAGGCAGCCAGCCAGGAAGGGAGGCAGAAGCATGCTAAGAACAACAGTCAGGCCAAGCCTTCTGCCTGTGATGCCTGTGCAGGGATGATTGCTGAGTGTCCTGGGGCCCCAGCAGGCCTGGCCAGGCAGCCGGAAGAGGTGGTATTGCAGGCCTCTGTCTCCTCATACCATCTATTCAGAGACGTAGCTGAAGTCACAGCCTTCCGAGGGAGCCTGCTAAGCTGGTACGACCAAGAGAAACGGGACCTACCATGGAGAAGACGGGCAGAAGATGAGATGGACCTGGACAGGCGGGCATATGCTGTGTGGGTCTCA…	-	-	-	-	1650	Human	ENSG00000132781	ENST00000450313
GenEZ ORF Clone: OHu26186C	ATGGTCGGCCAACTGAGCGAGGGGGCCATTGCGGCCATCATGCAGAAGGGGGATACAAACATAAAGCCCATCCTCCAAGTCATCAACATCCGTCCCATTACTACGGGGAATAGTCCGCCGCGTTATCGACTGCTCATGAGTGATGGATTGAACACTCTATCCTCTTTCATGTTGGCGACACAGTTGAACCCTCTCGTGGAGGAAGAACAATTGTCCAGCAACTGTGTATGCCAGATTCACAGATTTATTGTGAACACTCTGAAAGACGGAAGGAGAGTAGTTATCTTGATGGAATTAGAAGTTTTGAAGTCAGCTGAAGCAGTTGGAGTGAAGATTGGCAATCCAGTGCCCTATAATGAAGGACTCGGGCAGCCGCAAGTAGCTCCTCCAGCGCCAGCA…	-	-	-	-	1851	Human	ENSG00000132383	ENST00000254719
GenEZ ORF Clone: OHu19811C	ATGGGCACGACTGGGCTGGAGAGTCTGAGTCTGGGGGACCGCGGAGCTGCCCCCACCGTCACCTCTAGTGAGCGCCTAGTCCCAGACCCGCCGAATGACCTCCGCAAAGAAGATGTTGCTATGGAATTGGAAAGAGTGGGAGAAGATGAGGAACAAATGATGATAAAAAGAAGCAGTGAATGTAATCCCTTGCTACAAGAACCCATCGCTTCTGCTCAGTTTGGTGCTACTGCAGGAACAGAATGCCGTAAGTCTGTCCCATGTGGATGGGAAAGAGTTGTGAAGCAAAGGTTATTTGGGAAGACAGCAGGAAGATTTGATGTGTACTTTATCAGCCCACAAGGACTGAAGTTCAGATCCAAAAGTTCACTTGCTAATTATCTTCACAAAAATGGAGAG…	-	-	-	-	1743	Human	ENSG00000129071	ENST00000249910
GenEZ ORF Clone: OHu55904C	ATGGACAGACTTCTTAGACTTGGAGGAGGTATGCCTGGACTGGGCCAGGGGCCACCTACAGATGCTCCTGCAGTGGACACAGCAGAACAAGTCTATATCTCTTCCCTGGCACTGTTAAAAATGTTAAAACATGGCCGTGCTGGAGTTCCAATGGAAGTTATGGGTTTGATGCTTGGAGAATTTGTTGATGATTATACCGTCAGAGTGATTGATGTGTTTGCTATGCCACAGTCAGGAACAGGTGTCAGTGTGGAGGCAGTTGATCCAGTGTTCCAAGCTAAAATGTTGGATATGTTGAAGCAGACAGGAAGGCCGGAGATGGTTGTTGGTTGGTATCACAGTCACCCTGGCTTTGGTTGTTGGCTTTCTGGTGTGGATATCAACACTCAGCAGAGCTTT…	-	-	-	-	933	Human	ENSG00000115233	ENST00000409682
GenEZ ORF Clone: OHu25748C	ATGGATCTCAGCGAGCTGGAGAGAGACAATACAGGCCGCTGTCGCCTGAGTTCGCCTGTGCCCGCGGTGTGCCGCAAGGAGCCTTGCGTCCTGGGCGTCGATGAGGCGGGCAGGGGCCCCGTGCTGGGCCCCATGGTCTACGCCATCTGTTATTGTCCCCTGCCTCGCCTGGCAGATCTGGAGGCGCTGAAAGTGGCAGACTCAAAGACCCTATTGGAGAGCGAGCGGGAAAGGCTGTTTGCGAAAATGGAGGACACGGACTTTGTCGGCTGGGCGCTGGATGTGCTGTCTCCAAACCTCATCTCTACCAGCATGCTTGGGCGGGTCAAATACAACCTGAACTCCCTGTCACATGATACAGCCACTGGGCTTATACAGTATGCATTGGACCAGGGCGTG…	-	-	-	-	900	Human	ENSG00000104889	ENST00000221486
GenEZ ORF Clone: OHu31768C	ATGGAGGATCCACAGAGTAAAGAGCCTGCCGGCGAGGCCGTGGCTCTCGCGCTGCTGGAGTCGCCGCGGCCGGAGGGCGGGGAGGAGCCGCCGCGTCCCAGTCCCGAGGAAACTCAACAGTGTAAATTTGATGGCCAGGAGACAAAAGGATCCAAGTTCATTACCTCCAGTGCGAGTGACTTCAGTGACCCGGTTTACAAAGAGATTGCCATTACGAATGGCTGTATTAATAGAATGAGTAAGGAAGAACTCAGAGCTAAGCTTTCAGAATTCAAGCTTGAAACTAGAGGAGTAAAGGATGTTCTAAAGAAGAGACTGAAAAACTATTATAAGAAGCAGAAGCTGATGCTGAAAGAGAGCAATTTTGCTGACAGTTATTATGACTACATTTGTATTATT…	-	-	-	-	1050	Human	ENSG00000104626	ENST00000250263
GenEZ ORF Clone: OHu22734C	ATGGCCTCGGGCGACACCCTCTACATCGCCACGGACGGCTCGGAGATGCCGGCCGAGATCGTGGAGCTGCACGAGATCGAGGTGGAGACCATCCCGGTGGAGACCATCGAGACCACAGTGGTGGGCGAGGAGGAGGAGGAGGACGACGACGACGAGGACGGCGGCGGTGGCGACCACGGCGGCGGGGGCGGCCACGGGCACGCCGGCCACCACCACCACCACCATCACCACCACCACCACCCGCCCATGATCGCTCTGCAGCCGCTGGTCACCGACGACCCGACCCAGGTGCACCACCACCAGGAGGTGATCCTGGTGCAGACGCGCGAGGAGGTGGTGGGCGGCGACGACTCGGACGGGCTGCGCGCCGAGGACGGCTTCGAGGATCAGATTCTCATC…	-	-	-	-	1245	Human	ENSG00000100811	ENST00000262238
GenEZ ORF Clone: OHu22165C	ATGGCCCAGTCCACCGCCACCTCCCCTGATGGGGGCACCACGTTTGAGCACCTCTGGAGCTCTCTGGAACCAGACAGCACCTACTTCGACCTTCCCCAGTCAAGCCGGGGGAATAATGAGGTGGTGGGCGGAACGGATTCCAGCATGGACGTCTTCCACCTGGAGGGCATGACTACATCTGTCATGGCCCAGTTCAATCTGCTGAGCAGCACCATGGACCAGATGAGCAGCCGCGCGGCCTCGGCCAGCCCCTACACCCCAGAGCACGCCGCCAGCGTGCCCACCCACTCGCCCTACGCACAACCCAGCTCCACCTTCGACACCATGTCGCCGGCGCCTGTCATCCCCTCCAACACCGACTACCCCGGACCCCACCACTTTGAGGTCACTTTCCAGCAG…	-	-	-	-	1911	Human	ENSG00000078900	ENST00000378295
GenEZ ORF Clone: OHu27000C	ATGATCGGCCAGAAGACGCTCTACTCCTTTTTCTCCCCCAGCCCCGCCAGGAAGCGACACGCCCCCAGCCCCGAGCCGGCCGTCCAGGGGACCGGCGTGGCTGGGGTGCCTGAGGAAAGCGGAGATGCGGCGGCCATCCCAGCCAAGAAGGCCCCGGCTGGGCAGGAGGAGCCTGGGACGCCGCCCTCCTCGCCGCTGAGTGCCGAGCAGTTGGACCGGATCCAGAGGAACAAGGCCGCGGCCCTGCTCAGACTCGCGGCCCGCAACGTGCCCGTGGGCTTTGGAGAGAGCTGGAAGAAGCACCTCAGCGGGGAGTTCGGGAAACCGTATTTTATCAAGCTAATGGGATTTGTTGCAGAAGAAAGAAAGCATTACACTGTTTATCCACCCCCACACCAA…	-	-	-	-	942	Human	ENSG00000076248	ENST00000242576
GenEZ ORF Clone: OHu20078C	ATGCCGGAGATCCGCCTCCGCCATGTCGTGTCCTGCAGCAGCCAGGACTCGACTCACTGTGCAGAAAATCTTCTCAAGGCAGACACTTACCGAAAATGGCGGGCAGCCAAGGCAGGCGAGAAGACCATCTCTGTGGTCCTACAGTTGGAGAAGGAGGAGCAGATACACAGTGTGGACATTGGGAATGATGGCTCAGCTTTCGTGGAGGTGCTGGTGGGCAGTTCAGCTGGAGGCGCTGGGGAGCAAGACTATGAGGTCCTTCTGGTCACCTCATCTTTCATGTCCCCTTCCGAGAGCCGCAGTGGCTCAAACCCCAACCGCGTTCGCATGTTTGGGCCTGACAAGCTGGTCCGGGCAGCCGCCGAGAAGCGCTGGGACCGGGTCAAAATTGTTTGCAGC…	-	-	-	-	1902	Human	ENSG00000073050	ENST00000262887
GenEZ ORF Clone: OHu22043C	ATGTGTAGTCCGCAGGAGTCCGGCATGACCGCCTTGAGCGCGAGGATGCTGACCCGGAGCCGGAGCCTGGGACCCGGGGCTGGGCCGCGGGGGTGTAGGGAGGAGCCCGGGCCTCTCCGGAGAAGAGAGGCTGCAGCAGAAGCGAGGAAAAGCCACAGCCCCGTGAAGCGTCCGCGGAAAGCACAGAGACTGCGTGTGGCCTATGAGGGCTCGGACAGTGAGAAAGGTGAGGGGGCTGAGCCCCTCAAGGTGCCAGTCTGGGAGCCCCAGGACTGGCAGCAACAGCTGGTCAACATCCGTGCCATGAGGAACAAAAAGGATGCACCTGTGGACCATCTGGGGACTGAGCACTGCTATGACTCCAGTGCCCCCCCAAAGGTACGCAGGTACCAGGTGCTG…	-	-	-	-	939	Human	ENSG00000065057	ENST00000219066
GenEZ ORF Clone: OHu21280C	ATGGAGGTGGAGGCCGTCTGTGGTGGCGCGGGCGAGGTGGAGGCCCAGGACTCTGACCCTGCCCCTGCCTTCAGCAAGGCCCCCGGCAGCGCCGGCCACTACGAACTGCCGTGGGTTGAAAAATATAGGCCAGTAAAGCTGAATGAAATTGTCGGGAATGAAGACACCGTGAGCAGGCTAGAGGTCTTTGCAAGGGAAGGAAATGTGCCCAACATCATCATTGCGGGCCCTCCAGGAACCGGCAAGACCACAAGCATTCTGTGCTTGGCCCGGGCCCTGCTGGGCCCAGCACTCAAAGATGCCATGTTGGAACTCAATGCTTCAAATGACAGGGGCATTGACGTTGTGAGGAATAAAATTAAAATGTTTGCTCAACAAAAAGTCACTCTTCCCAAAGGC…	-	-	-	-	1065	Human	ENSG00000049541	ENST00000055077
GW_eDHFR	atgatcagcctgatcgccgccctggccgtggaccgggtgatcggcatggagaacgccatgccctggaacctgcccgccgacctggcctggttcaagcggaacaccctgaacaagcccgtgatcatgggccggcacacctgggagagcatcggccggcccctgcccggccggaagaacatcatcctgagcagccagcccggcaccgacgaccgggtgacctgggtgaagagcgtggacgaggccatcgccgcctgcggcgacgtgcccgagatcatggtgatcggcggcggccgggtgtacgagcagttcctgcccaaggcccagaagctgtacctgacccacatcgacgccgaggtggagggcgacacccacttccccgactacgagcccgacgactgg…	-	-	-	-	477	-	-	-	-	-
GW_Streptavidin	atggatccgagcaaagatagcaaagcgcaggtgagcgcggcggaagcgggcattaccggcacctggtataaccagctgggcagcacctttattgtgaccgcgggcgcggatggcgcgctgaccggcacctatgaaagcgcggtgggcaacgcggaaagccgctatgtgctgaccggccgctatgatagcgcgccggcgaccgatggcagcggcaccgcgctgggctggaccgtggcgtggaaaaacaactatcgcaacgcgcatagcgcgaccacctggagcggccagtatgtgggcggcgcggaagcgcgcattaacacccagtggctgctgaccagcggcaccaccgaagcgaacgcgtggaaaagcaccctggtgggccatgatacctttaccaaa…	-	-	-	-	480	-	-	-	-	-
GW_Halo	ATGGCAGAAATCGGTACTGGCTTTCCATTCGACCCCCATTATGTGGAAGTCCTGGGCGAGCGCATGCACTACGTCGATGTTGGTCCGCGCGATGGCACCCCTGTGCTGTTCCTGCACGGTAACCCGACCTCCTCCTACGTGTGGCGCAACATCATCCCGCATGTTGCACCGACCCATCGCTGCATTGCTCCAGACCTGATCGGTATGGGCAAATCCGACAAACCAGACCTGGGTTATTTCTTCGACGACCACGTCCGCTTCATGGATGCCTTCATCGAAGCCCTGGGTCTGGAAGAGGTCGTCCTGGTCATTCACGACTGGGGCTCCGCTCTGGGTTTCCACTGGGCCAAGCGCAATCCAGAGCGCGTCAAAGGTATTGCATTTATGGAGTTCATCCGC…	-	-	-	-	891	-	-	-	-	-
GW_SNAP	ATGGACAAAGACTGCGAAATGAAGCGCACCACCCTGGATAGCCCTCTGGGCAAGCTGGAACTGTCTGGGTGCGAACAGGGCCTGCACCGTATCATCTTCCTGGGCAAAGGAACATCTGCCGCCGACGCCGTGGAAGTGCCTGCCCCAGCCGCCGTGCTGGGCGGACCAGAGCCACTGATGCAGGCCACCGCCTGGCTCAACGCCTACTTTCACCAGCCTGAGGCCATCGAGGAGTTCCCTGTGCCAGCCCTGCACCACCCAGTGTTCCAGCAGGAGAGCTTTACCCGCCAGGTGCTGTGGAAACTGCTGAAAGTGGTGAAGTTCGGAGAGGTCATCAGCTACAGCCACCTGGCCGCCCTGGCCGGCAATCCCGCCGCCACCGCCGCCGTGAAAACCGCC…	-	-	-	-	546	-	-	-	-	-

## Sheet: FL_proteins_from_hORF8.1
insert name	ORF ID	Entrez Gene ID	Entrez Symbol	ORF size	Description	Sequence
ZSWIM7	2110@G08	125150	ZSWIM7	420	zinc finger, SWIM-type containing 7	ATGGCCGTAGTGTTGCCGGCGGTTGTGGAGGAGCTCCTGAGCGAGATGGCGGCGGCGGTGCAGGAGAGCGCGCGAATTCCTGATGAATATCTGTTATCGCTGAAGTTTCTCTTTGGCTCATCAGCCACCCAGGCCTTGGACCTAGTTGATCGACAGTCCATCACCTTAATCTCATCACCCAGTGGAAGGCGTGTTTACCAGGTCCTTGGAAGTTCCAGTAAAACATACACATGTTTGGCTTCTTGTCATTACTGTTCATGTCCTGCATTTGCATTCTCAGTGCTACGGAAGAGTGACAGCATCCTGTGCAAGCATCTCTTGGCAGTTTACCTGAGTCAGGTTATGAGGACCTGTCAGCAGCTAAGTGTCTCTGACAAGCAGTTGACTGACATATTATTG…
ZRANB3	2106@B02	84083	ZRANB3	3231	zinc finger, RAN-binding domain containing 3	ATGCCTAGGGTTCATAACATAAAAAAGTCTCTTACACCTCACATTTCTTGTGTGACAAATGAATCTGATAATCTGCTGGATTTTTTGCCTGACAGACTAAGAGCAAAGCTACTTCCATTCCAGAAAGATGGCATCATTTTTGCCCTCAAAAGAAATGGCAGGTGTATGGTGGCTGATGAAATGGGTCTAGGAAAGACAATCCAGGCAATTGGAATTACTTACTTCTATAAAGAGGAATGGCCTCTGTTAATAGTGGTCCCTTCGTCTCTGAGGTACCCTTGGACAGAAGAAATTGAAAAATGGATCCCAGAGCTAAGTCCAGAAGAAATCAATGTTATTCAGAATAAAACTGATGTTAGGAGAATGTCGACCAGTAAAGTGACAGTTCTGGGTTATGGT…
ZFYVE26	81062@B06	23503	ZFYVE26	984	zinc finger, FYVE domain containing 26	ATGAACAACACCTACTACCAGGAATGCCTCTTCTACCTGCACAACTATAGCACCAACCTGGCCATCATCAGCTTCTACGTGAGGCACAGCTGCCTGCGGGAAGCTCTTCTGCACCTTCTCAACAAGGAGAGTCCTCCAGAAGTTTTTATAGAAGGCATTTTCCAACCAAGCTATAAAAGTGGGAAGCTACACACTTTGGAGAACTTGCTAGAATCCATTGATCCAACCTTGGAGAGCTGGGGAAAGTACTTGATTGCTGCCTGCCAACATTTACAGAAGAAGAACTACTACCACATTCTGTATGAGCTGCAGCAGTTTATGAAGGACCAAGTTCGGGCCGCCATGACCTGTATTCGGTTCTTCAGTCACAAAGCAAAGTCATATACAGAACTGGGAGAG…
XRN2	81099@F04	22803	XRN2	1683	5'-3' exoribonuclease 2	ATGATCATGTTAGCAGTTGGTGAAGTTGAGGATAGCATTTTTAAAAAGAGAAAGGATGATGAGGACAGTTTTAGAAGACGACAGAAAGAAAAAAGAAAGAGAATGAAGAGAGATCAACCAGCTTTCACTCCTAGTGGAATATTAACTCCTCATGCCTTGGGTTCAAGAAATTCACCAGGTTCTCAAGTAGCCAGTAATCCGAGACAAGCAGCCTATGAAATGAGGATGCAGAATAACTCTAGTCCTTCGATATCTCCTAATACGAGTTTCACATCTGATGGCTCCCCGTCTCCATTAGGAGGAATTAAGCGAAAAGCAGAAGACAGTGACAGTGAACCTGAGCCAGAGGATAATGTCAGGTTATGGGAAGCTGGCTGGAAGCAGCGGTACTACAAGAAC…
XRCC2	81059@H09	7516	XRCC2	843	X-ray repair complementing defective repair in Chinese hamster cells 2	ATGTGTAGTGCCTTCCATAGGGCTGAGTCTGGGACCGAGCTCCTTGCCCGACTTGAAGGTAGAAGTTCCTTGAAAGAAATAGAACCAAATCTGTTTGCTGATGAAGATTCACCTGTGCATGGTGATATTCTTGAATTTCATGGCCCAGAAGGAACAGGAAAAACAGAAATGCTTTATCACCTAACAGCACGATGTATACTTCCCAAATCAGAAGGTGGCCTGGAAGTAGAAGTCTTATTTATTGATACAGATTACCACTTTGATATGCTCCGGCTAGTTACAATTCTTGAGCACAGACTATCCCAAAGCTCTGAAGAAATAATCAAATACTGCCTGGGAAGATTTTTTTTGGTGTACTGCAGTAGTAGCACCCACTTACTTCTTACACTTTACTCACTA…
XPC	81127@D10	7508	XPC	2823	xeroderma pigmentosum, complementation group C	ATGGCTCGGAAACGCGCGGCCGGCGGGGAGCCGCGGGGACGCGAACTGCGCAGCCAGAAATCCAAGGCCAAGAGCAAGGCCCGGCGTGAGGAGGAGGAGGAGGATGCCTTTGAAGATGAGAAACCCCCAAAGAAGAGCCTTCTCTCCAAAGTTTCACAAGGAAAGAGGAAAAGAGGCTGCAGTCATCCTGGGGGTTCAGCAGATGGTCCAGCAAAAAAGAAAGTGGCCAAGGTGACTGTTAAATCTGAAAACCTCAAGGTTATAAAGGATGAAGCCCTCAGCGATGGGGATGACCTCAGGGACTTTCCAAGTGACCTCAAGAAGGCACACCATCTGAAGAGAGGGGCTACCATGAATGAAGACAGCAATGAAGAAGAGGAAGAAAGTGAAAATGATTGG…
XPA	81080@G06	7507	XPA	822	xeroderma pigmentosum, complementation group A	ATGGCGGCGGCCGACGGGGCTTTGCCGGAGGCGGCGGCTTTAGAGCAACCCGCGGAGCTGCCTGCCTCGGTGCGGGCGAGTATCGAGCGGAAGCGGCAGCGGGCACTGATGCTGCGCCAGGCCCGGCTGGCTGCCCGGCCCTACTCGGCGACGGCGGCTGCGGCTACTGGAGGCATGGCTAATGTAAAAGCAGCCCCAAAGATAATTGACACAGGAGGAGGCTTCATTTTAGAAGAGGAAGAAGAAGAAGAACAGAAAATTGGAAAAGTTGTTCATCAACCAGGACCTGTTATGGAATTTGATTATGTAATATGCGAAGAATGTGGGAAAGAATTTATGGATTCTTATCTTATGAACCACTTTGATTTGCCAACTTGTGATAACTGCAGAGATGCTGAT…
WDR48	81125@G09	57599	WDR48	1509	WD repeat domain 48	ATGAATCAACTGGGAACAATCATTGTATCAGGGTCCACTGAAAAGGTGTTACGGGTATGGGATCCAAGAACATGTGCAAAACTAATGAAGCTTAAAGGGCACACGGATAATGTGAAGGCATTGCTATTAAACAGAGATGGCACGCAATGCCTGTCAGGCAGTTCTGATGGGACAATTCGCCTTTGGTCCCTTGGCCAGCAGAGATGTATAGCAACATACCGAGTCCATGATGAAGGTGTTTGGGCGCTGCAAGTCAATGATGCCTTCACACATGTGTATTCTGGTGGAAGGGACAGGAAGATTTATTGTACAGACCTAAGAAACCCTGACATTCGGGTGCTAATTTGTGAAGAAAAAGCACCAGTTCTCAAGATGGAGCTTGATAGATCAGCTGATCCT…
ALKBH1	81074@G01	8846	ALKBH1	1170	alkB, alkylation repair homolog 1 (E. coli)	ATGGGGAAGATGGCAGCGGCCGTGGGCTCTGTGGCGACTCTGGCGACTGAGCCCGGGGAGGACGCCTTTCGGAAACTTTTCCGCTTCTACCGTCAGAGCCGGCCCGGGACCGCAGACCTGGAAGGGGTCATCGACTTCTCGGCGGCCCACGCAGCCCGTGGCAAGGGTCCTGGTGCCCAAAAGGTGATCAAATCTCAGCTAAATGTGTCTTCTGTCAGTGAGCAGAATGCATATAGAGCAGGTCTTCAGCCCGTCAGCAAGTGGCAAGCCTATGGACTCAAAGGCTATCCTGGGTTTATTTTTATCCCAAACCCCTTCCTCCCAGGTTACCAGTGGCACTGGGTGAAACAGTGCCTTAAGTTATATTCCCAGAAACCTAATGTATGTAACCTGGACAAA…
USP47	81023@G06	55031	USP47	474	ubiquitin specific peptidase 47	ATGAAGTCCATGTCACAGCTTGCAGTTTTGTCAAGACGGTGGAAGCCTTCAGAGATGAAGTTGGATCCCTTCCAGGAGGTTGTATTGGAAAGCAGTAGTGTGGACGAATTGCGAGAGAAGCTTAGTGAAATCAGTGGGATTCCTTTGGATGATATTGAATTTGCTAAGGGTAGAGGAACATTTCCCTGTGATATTTCTGTCCTTGATATTCATCAAGATTTAGACTGGAATCCTAAAGTTTCTACCCTGAATGTCTGGCCTCTTTATATCTGTGATGATGGTGCGGTCATATTTTATAGGGATAAAACAGAAGAATTAATGGAATTGACAGATGAGCAAAGAAATGAACTGATGAAAAAAGAAAGCAGTCGACTCCAGAAGACTGGACATCGTGTAACA…
UBQLN4	81002@D07	56893	UBQLN4	189	ubiquilin 4	ATGATCCAGCTTTTGGCTGGAAGTGGAAACTCACAGGTGCAGACGCCAGAAGTGAGATTTCAGCAGCAGCTGGAGCAGCTCAACTCCATGGGCTTCATCAATCGTGAGGCTAACCTGCAGGCCCTGATTGCCACAGGAGGGGACATCAACGCAGCTATCGAGAGACTGCTGGGCTCCCAGCTCTCCTAA
UBE2N	2105@C03	7334	UBE2N	456	ubiquitin-conjugating enzyme E2N	ATGGCCGGGCTGCCCCGCAGGATCATCAAGGAAACCCAGCGTTTGCTGGCAGAACCAGTTCCTGGCATCAAAGCCGAACCAGATGAGAGCAACGCCCGTTATTTTCATGTGGTCATTGCTGGCCCTCAGGATTCCCCCTTTGAGGGAGGGACTTTTAAACTTGAACTATTCCTTCCAGAAGAATACCCAATGGCAGCCCCTAAAGTACGTTTCATGACCAAAATTTATCATCCTAATGTAGACAAGTTGGGAAGAATATGTTTAGATATTTTGAAAGATAAGTGGTCCCCAGCACTGCAGATCCGCACAGTTCTGCTATCGATCCAGGCCTTGTTAAGTGCTCCCAATCCAGATGATCCATTAGCAAATGATGTAGCGGAGCAGTGGAAGACCAACGAA…
UBE2I	81013@B03	7329	UBE2I	477	ubiquitin-conjugating enzyme E2I	ATGTCGGGGATCGCCCTCAGCAGACTCGCCCAGGAGAGGAAAGCATGGAGGAAAGACCACCCATTTGGTTTCGTGGCTGTCCCAACAAAAAATCCCGATGGCACGATGAACCTCATGAACTGGGAGTGCGCCATTCCAGGAAAGAAAGGGACTCCGTGGGAAGGAGGCTTGTTTAAACTACGGATGCTTTTCAAAGATGATTATCCATCTTCGCCACCAAAATGTAAATTCGAACCACCATTATTTCACCCGAATGTGTACCCTTCGGGGACAGTGTGCCTGTCCATCTTAGAGGAGGACAAGGACTGGAGGCCAGCCATCACAATCAAACAGATCCTATTAGGAATACAGGAACTTCTAAATGAACCAAATATCCAAGACCCAGCTCAAGCAGAGGCC…
TREX2	2114@A01	11219	TREX2	708	three prime repair exonuclease 2	ATGTCCGAGGCACCCCGGGCCGAGACCTTTGTCTTCCTGGACCTGGAAGCCACTGGGCTCCCCAGTGTGGAGCCCGAGATTGCCGAGCTGTCCCTCTTTGCTGTCCACCGCTCCTCCCTGGAGAACCCGGAGCACGACGAGTCTGGTGCCCTAGTATTGCCCCGGGTCCTGGACAAGCTCACGCTGTGCATGTGCCCGGAGCGCCCCTTCACTGCCAAGGCCAGCGAGATCACCGGCCTGAGCAGTGAGGGCCTGGCGCGATGCCGGAAGGCTGGCTTTGATGGCGCCGTGGTGCGGACGCTGCAGGCCTTCCTGAGCCGCCAGGCAGGGCCCATCTGCCTTGTGGCCCACAATGGCTTTGATTATGATTTCCCCCTGCTGTGTGCCGAGCTGCGGCGC…
TREX1	81071@A10	11277	TREX1	1110	three prime repair exonuclease 1	ATGGGCCCTGGAGCTCGCAGACAGGGCAGGATTGTGCAGGGAAGGCCTGAGATGTGCTTCTGCCCACCCCCTACCCCACTCCCTCCCCTTCGGATCTTAACACTGGGCACTCACACACCCACCCCATGCTCCTCTCCAGGCTCAGCAGCAGGTACGTACCCAACCATGGGCTCGCAGGCCCTGCCCCCGGGGCCCATGCAGACCCTCATCTTTTTCGACATGGAGGCCACTGGCTTGCCCTTCTCCCAGCCCAAGGTCACGGAGCTGTGCCTGCTGGCTGTCCACAGATGTGCCCTGGAGAGCCCCCCCACCTCTCAGGGGCCACCTCCCACAGTTCCTCCACCACCGCGTGTGGTAGACAAGCTCTCCCTGTGTGTGGCTCCGGGGAAGGCCTGCAGC…
TP53	81074@B03	7157	TP53	1182	tumor protein p53	ATGGAGGAGCCGCAGTCAGATCCTAGCGTCGAGCCCCCTCTGAGTCAGGAAACATTTTCAGACCTATGGAAACTACTTCCTGAAAACAACGTTCTGTCCCCCTTGCCGTCCCAAGCAATGGATGATTTGATGCTGTCCCCGGACGATATTGAACAATGGTTCACTGAAGACCCAGGTCCAGATGAAGCTCCCAGAATGCCAGAGGCTGCTCCCCGCGTGGCCCCTGCACCAGCAGCTCCTACACCGGCGGCCCCTGCACCAGCCCCCTCCTGGCCCCTGTCATCTTCTGTCCCTTCCCAGAAAACCTACCAGGGCAGCTACGGTTTCCGTCTGGGCTTCTTGCATTCTGGGACAGCCAAGTCTGTGACTTGCACGTACTCCCCTGCCCTCAACAAGATG…
TONSL	81020@D06	4796	TONSL	3660	tonsoku-like, DNA repair protein	ATGAGGACCCGCCTCTATCTCAACCTGGGCCTCACCTTTGAGAGCCTGCAGCAGACAGCCCTGTGCAACGATTACTTCAGGAAGAGCATCTTCCTTGCGGAGCAGAACCACCTTTACGAGGACCTATTCCGCGCCCGCTACAACCTGGGCACCATCCACTGGCGCGCGGGCCAGCACTCCCAGGCTATGCGCTGCTTGGAGGGTGCCCGGGAGTGTGCGCACACCATGAGGAAGCGGTTCATGGAGAGCGAGTGCTGCGTGGTTATTGCACAGGTCCTCCAAGACCTGGGAGACTTTTTGGCTGCCAAGCGAGCCCTGAAGAAGGCCTACAGGCTGGGCTCCCAGAAGCCTGTGCAGAGGGCAGCCATCTGTCAGAACCTCCAGCATGTGCTGGCAGTG…
TCEA1	81118@B08	6917	TCEA1	906	transcription elongation factor A (SII), 1	ATGGAGGACGAAGTGGTCCGCTTTGCCAAGAAGATGGACAAGATGGTGCAGAAGAAGAACGCGGCTGGAGCATTGGATTTGCTAAAGGAGCTTAAGAATATTCCTATGACCCTGGAATTACTGCAGTCCACAAGAATCGGAATGTCAGTTAATGCTATTCGCAAGCAGAGTACAGATGAGGAAGTTACATCTTTGGCAAAGTCTCTCATCAAATCCTGGAAAAAATTATTAGATGGGCCATCAACTGAGAAAGACCTTGACGAAAAGAAGAAAGAACCTGCAATTACATCGCAGAACAGCCCTGAGGCAAGAGAAGAAAGTACTTCCAGCGGCAATGTAAGCAACAGAAAGGATGAGACAAATGCTCGAGATACTTATGTTTCATCCTTTCCTCGGGCA…
SWSAP1	81045@H10	126074	SWSAP1	690	SWIM-type zinc finger 7 associated protein 1	ATGCCTGCCGCCGGACCGCCTTTGCTGCTGCTCGGTACACCAGGATCTGGAAAAACAGCGCTGCTATTTGCTGCGGCCCTAGAGGCGGCGGGGGAGGGCCAAGGCCCAGTCCTCTTCCTGACACGAAGGCCTCTTCAAAGCATGCCCCGCGGGACCGGAACGACTCTAGACCCAATGCGACTCCAGAAGATCCGCTTCCAGTACCCACCCTCAACCCGAGAGCTTTTCCGGCTCCTGTGCTCTGCCCATGAGGCCCCGGGGCCAGCCCCCTCCCTTCTGCTGCTCGACGGCCTAGAAGAGTACCTAGCGGAAGACCCAGAGCCCCAGGAAGCCGCCTACCTCATTGCCTTACTTCTAGACACAGCTGCCCACTTCAGCCACCGGCTTGGGCCTGGCCGG…
KIAA0146	2125@G02	23514	KIAA0146	2748	KIAA0146	ATGCCCCGCGGCAGCCGCGCTCGGGGCTCTAAGAGAAAAAGGAGTTGGAATACAGAATGCCCATCCTTTCCAGGAGAAAGACCACTGCAGGTCAGAAGAGCAGGTCTCAGGACAGCAGGGGCAGCTGCCTCTCTCTCTGAAGCATGGCTCAGGTGTGGAGAAGGGTTTCAGAACACTTCTGGGAATCCGTCATTAACAGCTGAAGAGAAGACGATTACAGAAAAGCACCTTGAATTATGCCCTAGACCCAAGCAAGAAACCACCACATCTAAAAGCACCAGTGGGCTTACAGACATAACATGGAGCTCCAGTGGAAGTGATTTGTCGGATGAAGATAAGACACTTTCTCAGTTACAGAGAGATGAATTACAGTTTATCGACTGGGAGATTGACAGTGAC…
SMUG1	81026@H01	23583	SMUG1	534	single-strand-selective monofunctional uracil-DNA glycosylase 1	ATGCCCCAGGCTTTCCTGCTGGGGTCCATCCATGAGCCTGCAGGTGCCCTCATGGAGCCCCAGCCCTGCCCTGGAAGCTTGGCTGAGAGCTTCCTGGAGGAGGAGCTTCGGCTCAATGCTGAGCTGAGCCAGCTGCAGTTTTCGGAGCCTGTGGGCATCATCTACAATCCCGTGGAGTATGCATGGGAGCCACATCGCAACTACGTGACTCGCTACTGCCAGGGCCCCAAGGAAGTACTCTTCCTGGGCATGAACCCTGGACCTTTTGGCATGGCCCAGACTGGGGTGCCCTTTGGGGAAGTAAGCATGGTCCGGGACTGGTTGGGCATTGTGGGGCCTGTGCTGACCCCTCCCCAAGAGCATCCTAAACGACCAGTGCTGGGACTGGAGTGCCCACAG…
SMC6	2106@B08	79677	SMC6	3273	structural maintenance of chromosomes 6	ATGGCCAAAAGAAAGGAAGAAAATTTTTCCTCTCCTAAAAATGCCAAAAGGCCAAGACAAGAAGAATTGGAGGATTTTGATAAAGATGGTGACGAAGACGAATGTAAAGGTACTACTTTGACTGCAGCAGAAGTTGGAATAATTGAGAGTATTCACCTAAAAAACTTCATGTGTCATTCAATGCTTGGACCTTTTAAGTTTGGTTCTAATGTCAACTTTGTTGTTGGCAACAATGGAAGTGGGAAGAGTGCAGTACTCACAGCTCTCATAGTCGGTCTTGGTGGAAGAGCAGTTGCTACTAATAGAGGATCCTCTTTAAAAGGTTTTGTGAAAGATGGACAGAACTCTGCAGATATCTCAATAACATTGAGGAACAGAGGAGATGATGCCTTTAAAGCC…
SMC5	2107@E08	23137	SMC5	3303	structural maintenance of chromosomes 5	ATGGCGACTCCGAGCAAGAAGACGTCAACTCCAAGCCCCCAGCCTTCCAAGAGAGCTCTCCCGAGAGACCCTTCGTCGGAGGTCCCGAGCAAGAGGAAGAATTCGGCCCCGCAGCTGCCGCTGTTGCAGTCGTCCGGGCCTTTCGTGGAAGGCTCTATCGTCCGCATCTCGATGGAGAACTTCCTAACATATGATATTTGTGAAGTATCTCCTGGACCCCACTTGAATATGATCGTTGGAGCCAATGGAACAGGGAAGTCGAGCATTGTGTGTGCCATTTGCCTTGGTTTAGCTGGAAAACCTGCTTTCATGGGACGAGCAGATAAGGTTGGGTTTTTTGTGAAGAGAGGATGTTCTAGAGGCATGGTTGAAATTGAATTGTTCAGGGCTTCTGGAAAT…
SLX4	81138@H02	84464	SLX4	3456	SLX4 structure-specific endonuclease subunit homolog (S. cerevisiae)	ATGGTCAATAACCCACACCTGAGTGATGTCCAGTTTCAGACGGACAGCGGGGAGGTGCTTTACGCCCACAAGTTCGTGCTTTATGCCCGATGCCCGCTCCTCATCCAGTATGTGAACAATGAAGGCTTCTCCGCTGTAGAGGACGGGGTTCTGACCCAGCGTGTCCTGCTGGGTGACGTGAGCACCGAGGCCGCCCGCACGTTCCTGCACTATCTCTACACTGCGGACACTGGCCTTCCTCCTGGCCTTAGCTCTGAGCTGAGCTCCCTGGCCCACAGGTTTGGCGTGAGTGAGCTCGTTCACCTGTGCGAACAGGTGCCTATTGCCACTGACTCAGAGGGCAAACCATGGGAGGAGAAGGAAGCAGAGAATTGCGAAAGCAGGGCCGAGAATTTCCAG…
SLX1B	81013@G05	79008	SLX1B	486	SLX1 structure-specific endonuclease subunit homolog B (S. cerevisiae)	ATGGGTCCCGCGGGGGTCGCGGCGAGGCCAGGGCGCTTTTTCGGCGTCTACCTGCTCTACTGCCTGAACCCCCGGTACCGGGGCCGCGTCTACGTGGGGTTCACTGTCAACACTGCTCGTCGGGTCCAGCAGCACAATGGGGGCCGCAAAAAAGGCGGGGCCTGGCGGACCAGCGGGCGAGGGCCCTGGGAGATGGTGCTCGTCGTGCACGGCTTCCCGTCCTCCGTGGCCGCCCTTCGGGATGAAGAGGGGCCCTTGTGTTGCCCCCACCCTGGCTGCCTGCTAAGGGCCCATGTGATCTGCCTGGCAGAGGAGTTTCTTCAGGAAGAACCAGGGCAGCTTCTGCCCCTAGAGGGCCAATGCCCTTGCTGTGAGAAGTCACTGCTTTGGGGAGACCTG…
SLX1B	81117@G10	79008	SLX1B	828	SLX1 structure-specific endonuclease subunit homolog B (S. cerevisiae)	ATGGGTCCCGCGGGGGTCGCGGCGAGGCCAGGGCGCTTTTTCGGCGTCTACCTGCTCTACTGCCTGAACCCCCGGTACCGGGGCCGCGTCTACGTGGGGTTCACTGTCAACACTGCTCGTCGGGTCCAGCAGCACAATGGGGGCCGCAAAAAAGGCGGGGCCTGGCGGACCAGCGGGCGAGGGCCCTGGGAGATGGTGCTCGTCGTGCACGGCTTCCCGTCCTCCGTGGCCGCCCTTCGGTTTGAGTGGGCTTGGCAGCACCCGCACGCCTCGCGCCGCCTGGCGCACGTGGGGCCTCGCCTGCGAGGAGAGACAGCCTTCGCTTTCCACCTGCGCGTGCTGGCGCACATGCTGCGCGCACCGCCCTGGGCTCGCCTCCCGCTCACGCTGCGCTGGGTG…
SLX1A	2117@D01	548593	SLX1A	483	SLX1 structure-specific endonuclease subunit homolog A (S. cerevisiae)	ATGGGTCCCGCGGGGGTCGCGGCGAGGCCAGGGCGCTTTTTCGGCGTCTACCTGCTCTACTGCCTGAACCCCCGGTACCGGGGCCGCGTCTACGTGGGGTTCACTGTCAACACTGCTCGTCGGGTCCAGCAGCACAATGGGGGCCGCAAAAAAGGCGGGGCCTGGCGGACCAGCGGGCGAGGGCCCTGGGAGATGGTGCTCGTCGTGCACGGCTTCCCGTCCTCCGTGGCCGCCCTTCGGGATGAAGAGGGGCCCTTGTGTTGCCCCCACCCTGGCTGCCTGCTAAGGGCCCATGTGATCTGCCTGGCAGAGGAGTTTCTTCAGGAAGAACCAGGGCAGCTTCTGCCCCTAGAGGGCCAATGCCCTTGCTGTGAGAAGTCACTGCTTTGGGGAGACCTG…
SLC30A9	81099@G06	10463	SLC30A9	1707	solute carrier family 30 (zinc transporter), member 9	ATGTTACCGGGCTTGGCCGCCGCCGCGGCCCACAGATGTAGCTGGTCCTCCCTGTGCCGGCTCCGTCTGCGATGCAGGGCGGCGGCCTGTAATCCCAGCGACCGCCAGGAGTGGCAGAATTTAGTGACATTTGGAAGCTTTTCAAACGTGGTTCCCTGTAGTCATCCATATATTGGTACCCTGAGTCAAGTAAAGTTGTACTCCACAAATGTTCAGAAAGAAGGACAGGGATCACAAACACTCAGAGTGGAAAAAGTACCATCATTTGAAACAGCAGAAGGTATAGGCGCAGAACTCAAAGCTCCACTTAAGCAAGAACCTCTCCAAGTAAGAGTTAAAGCAGTCCTTAAGAAAAGGGAGTATGGATCAAAGTACACTCAGAATAATTTCATCACTGGA…
SIRT6	81066@B03	51548	SIRT6	1068	sirtuin 6	ATGTCGGTGAATTACGCGGCGGGGCTGTCGCCGTACGCGGACAAGGGCAAGTGCGGCCTCCCGGAGATCTTCGACCCCCCGGAGGAGCTGGAGCGGAAGGTGTGGGAACTGGCGAGGCTGGTCTGGCAGTCTTCCAGTGTGGTGTTCCACACGGGTGCCGGCATCAGCACTGCCTCTGGCATCCCCGACTTCAGGGGTCCCCACGGAGTCTGGACCATGGAGGAGCGAGGTCTGGCCCCCAAGTTCGACACCACCTTTGAGAGCGCGCGGCCCACGCAGACCCACATGGCGCTGGTGCAGCTGGAGCGCGTGGGCCTCCTCCGCTTCCTGGTCAGCCAGAACGTGGACGGGCTCCATGTGCGCTCAGGCTTCCCCAGGGACAAACTGGCAGAGCTCCAC…
SIRT6	81058@B11	51548	SIRT6	771	sirtuin 6	ATGGAGGAGCGAGGTCTGGCCCCCAAGTTCGACACCACCTTTGAGAGCGCGCGGCCCACGCAGACCCACATGGCGCTGGTGCAGCTGGAGCGCGTGGGCCTCCTCCGCTTCCTGGTCAGCCAGAACGTGGACGGGCTCCATGTGCGCTCAGGCTTCCCCAGGGACAAACTGGCAGAGCTCCACGGGAACATGTTTGTGGAAGAATGTGCCAAGTGTAAGACGCAGTACGTCCGAGACACAGTCGTGGGCACCATGGGCCTGAAGGCCACGGGCCGGCTCTGCACCGTGGCTAAGGCAAGGGGGCTGCGAGCCTGCAGGAACGCCGACCTGTCCATCACGCTGGGTACATCGCTGCAGATCCGGCCCAGCGGGAACCTGCCGCTGGCTACCAAGCGCCGG…
SHFM1	81002@B01	7979	SHFM1	213	split hand/foot malformation (ectrodactyly) type 1	ATGTCAGAGAAAAAGCAGCCGGTAGACTTAGGTCTGTTAGAGGAAGACGACGAGTTTGAAGAGTTCCCTGCCGAAGACTGGGCTGGCTTAGATGAAGATGAAGATGCACATGTCTGGGAGGATAATTGGGATGATGACAATGTAGAGGATGACTTCTCTAATCAGTTACGAGCTGAACTAGAGAAACATGGTTATAAGATGGAGACTTCATAG
SFR1	81053@F02	119392	SFR1	924	SWI5-dependent recombination repair 1	ATGAAAAACTTAGTGGTCCCTATGTGGGAAGGTAAATGGAAAACTGCAAAAAGAGCAAGAATGAATTACAAAGTGAAATTAGAAGAAATATCTGGCTTACTTGTGGATGCTTTGTACACCAATACAATATATTATTTGATAAAAGTCGACTATAGAGAGGTGTGGTTAATTCGATTATTTTATAATTTTTCTTTTTTAGAGAAAAACCAAGATTTCACTTTCAAGATGGAAAGTCCGTCAGACTCAGCTGTGGTTTTACCTAGCACTCCTCAGGCCTCTGCGAATCCATCATCTCCCTATACAAATAGTTCCCGAAAACAACCTATGAGTGCAACACTTAGAGAAAGATTAAGGAAAACAAGATTTTCATTTAATTCCTCTTACAATGTGGTGAAACGT…
SFR1	81037@A06	119392	SFR1	699	SWI5-dependent recombination repair 1	ATGGAAAGTCCGTCAGGCTCAGCTGTGGTTTTACCTAGCACTCCTCAGGCCTCTGCGAATCCATCATCTCCCTATACAAATAGTTCCCGAAAACAACCTATGAGTGCAACACTTAGAGAAAGATTAAGGAAAACAAGATTTTCATTTAATTCCTCTTACAATGTGGTGAAACGTCTTAAAGTAGAGAGTGAAGAAAATGATCAGACCTTTTCAGAGAAACCAGCATCTTCCACAGAGGAAAACTGTTTGGAATTTCAAGAAAGTTTTAAACATATAGACAGTGAATTTGAAGAAAATACAAATTTGAAAAATACTTTGAAGAATCTCAATGTCTGTGAATCTCAGTCACTTGATTCTGGATCATGCAGTGCTCTCCAAAATGAGTTTGTGAGTGAGAAG…
SFPQ	81129@H06	6421	SFPQ	2124	splicing factor proline/glutamine-rich	ATGTCTCGGGATCGGTTCCGGAGTCGTGGCGGTGGCGGTGGTGGCTTCCACAGGCGTGGAGGAGGCGGCGGCCGCGGCGGCCTCCACGACTTCCGTTCTCCGCCGCCCGGCATGGGCCTCAATCAGAATCGCGGCCCCATGGGTCCTGGCCCGGGCCAGAGCGGCCCTAAGCCTCCGATCCCGCCACCGCCTCCACACCAACAGCAGCAACAGCCACCACCGCAGCAGCCACCGCCGCAGCAGCCGCCACCGCATCAGCCGCCGCCGCATCCACAGCCGCATCAGCAGCAGCAGCCGCCGCCACCGCCGCAGGACTCTTCCAAGCCCGTCGTTGCTCAGGGACCCGGCCCCGCTCCCGGAGTAGGCAGCACACCACCAGCCTCCAGCTCGGCCCCGCCC…
RPA4	81042@F12	29935	RPA4	786	replication protein A4, 30kDa	ATGAGTAAGAGTGGGTTTGGGAGCTATGGCAGCATTTCTGCTGCTGATGGAGCGAGTGGAGGCAGTGACCAACTGTGTGAGAGAGATGCAACTCCTGCTATTAAGACCCAAAGACCTAAGGTCCGAATTCAGGACGTTGTACCGTGTAATGTGAACCAGCTTCTCAGCTCTACTGTGTTTGACCCTGTGTTCAAGGTTAGGGGAATTATAGTTTCCCAGGTCTCCATCGTGGGGGTAATCAGAGGGGCAGAGAAGGCTTCAAATCACATTTGTTACAAAATTGATGATATGACCGCGAAACCAATCGAGGCCCGACAGTGGTTTGGTAGAGAGAAAGTCAAGCAGGTGACTCCATTGTCAGTCGGAGTATATGTCAAAGTGTTTGGTATCCTCAAATGT…
RPA2	81043@C07	6118	RPA2	813	replication protein A2, 32kDa	ATGTGGAACAGTGGATTCGAAAGCTATGGCAGCTCCTCATACGGGGGAGCCGGCGGCTACACGCAGTCCCCGGGGGGCTTTGGATCGCCCGCACCTTCTCAAGCCGAAAAGAAATCAAGAGCCCGAGCCCAGCACATTGTGCCCTGTACTATATCTCAGCTGCTTTCTGCCACTTTGGTTGATGAAGTGTTCAGAATTGGGAATGTTGAGATTTCACAGGTCACTATTGTGGGGATCATCAGACATGCAGAGAAGGCTCCAACCAACATTGTTTACAAAATAGATGACATGACAGCTGCACCCATGGACGTTCGCCAGTGGGTTGACACAGATGACACCAGCAGTGAAAACACTGTGGTTCCTCCAGAAACATATGTGAAAGTGGCAGGCCACCTGAGA…
RNF8	81088@H07	9025	RNF8	1458	ring finger protein 8, E3 ubiquitin protein ligase	ATGGGGGAGCCCGGCTTCTTCGTCACAGGAGACCGCGCCGGTGGCCGGAGCTGGTGCCTGCGGCGGGTGGGGATGAGCGCCGGGTGGCTGCTGCTGGAAGATGGGTGCGAGGTGACTGTAGGACGAGGATTTGGTGTCACATACCAACTGGTATCAAAAATCTGCCCCCTGATGATTTCTCGAAACCACTGTGTTTTGAAGCAGAATCCTGAGGGCCAATGGACAATTATGGACAACAAGAGTCTAAATGGTGTTTGGCTGAACAGAGCGCGTCTGGAACCTTTAAGGGTCTATTCCATTCATCAGGGAGACTACATCCAACTTGGAGTGCCTCTGGAAAATAAGGAGAATGCGGAGTATGAATATGAAGTTACTGAAGAAGACTGGGAGACAATATAT…
RNF20	81019@C09	56254	RNF20	2928	ring finger protein 20, E3 ubiquitin protein ligase	ATGTCAGGAATTGGAAATAAAAGAGCAGCTGGAGAACCTGGCACCTCCATGCCTCCTGAGAAGAAGGCAGCTGTTGAAGATTCAGGGACCACAGTGGAAACAATTAAGCTAGGAGGTGTCTCTTCAACGGAGGAACTAGACATTAGAACACTGCAAACCAAAAATCGCAAGCTGGCAGAAATGTTGGATCAGCGGCAGGCCATTGAAGATGAACTTCGTGAGCACATTGAAAAACTGGAACGACGACAGGCCACTGATGATGCCTCACTATTGATTGTCAACCGATACTGGAGTCAGTTTGATGAAAACATCCGTATCATCCTTAAACGTTATGATCTGGAGCAGGGCTTGGGAGACCTACTCACAGAACGAAAAGCCCTTGTTGTGCCTGAACCAGAA…
RFC5	81064@F07	5985	RFC5	1023	replication factor C (activator 1) 5, 36.5kDa	ATGGAGACCTCAGCACTCAAGCAGCAGGAGCAGCCCGCGGCGACCAAGATCAGGAACCTGCCCTGGGTTGAAAAATACCGGCCACAGACCCTGAATGATCTCATTTCTCATCAGGACATTCTGAGTACCATTCAGAAGTTTATCAATGAAGACCGACTGCCACACTTGCTTCTCTACGGTCCCCCAGGGACAGGCAAGACATCTACCATCCTAGCCTGTGCGAAACAGCTATATAAAGACAAAGAATTTGGCTCCATGGTCTTGGAGCTGAATGCTTCAGATGACCGAGGAATAGACATCATTCGAGGACCGATCCTGAGCTTTGCTAGCACAAGGACAATATTTAAGAAAGGCTTTAAGCTAGTGATCTTGGATGAAGCAGACGCCATGACTCAGGAC…
RFC4	81134@A04	5984	RFC4	1092	replication factor C (activator 1) 4, 37kDa	ATGCAAGCATTTCTTAAAGGTACATCCATCAGTACTAAACCCCCGCTGACCAAGGATCGAGGAGTAGCTGCCAGTGCGGGAAGTAGCGGAGAGAACAAGAAAGCCAAACCCGTTCCCTGGGTGGAAAAATATCGCCCAAAATGTGTGGATGAAGTTGCTTTCCAGGAAGAAGTGGTTGCAGTGCTGAAAAAATCTTTAGAAGGAGCAGATCTTCCTAATCTCTTGTTTTACGGACCACCTGGAACTGGAAAAACATCCACTATTTTGGCAGCAGCTAGAGAACTCTTTGGGCCTGAACTTTTCCGATTAAGAGTTCTTGAGTTAAATGCATCTGATGAACGTGGAATACAAGTAGTTCGAGAGAAAGTGAAAAATTTTGCTCAATTAACTGTGTCAGGA…
RFC3	2107@A07	5983	RFC3	1068	replication factor C (activator 1) 3, 38kDa	ATGAGCCTCTGGGTGGACAAGTATCGGCCCTGCTCCTTGGGACGGCTGGACTATCACAAGGAGCAGGCGGCCCAGCTGCGGAACCTGGTGCAGTGTGGTGACTTTCCTCATCTGTTAGTGTACGGACCATCAGGTGCTGGAAAAAAGACAAGAATTATGTGTATTCTACGTGAACTTTATGGTGTTGGAGTGGAAAAATTGAGAATTGAACATCAGACCATCACAACTCCATCTAAAAAAAAAATTGAAATTAGCACCATTGCAAGTAACTACCACCTTGAAGTTAATCCTAGTGATGCTGGAAATAGTGACCGAGTAGTCATTCAGGAGATGTTGAAAACAGTGGCACAATCACAACAACTTGAAACAAACTCTCAAAGGGATTTTAAAGTGGTATTA…
RFC1	81137@A06	5981	RFC1	3447	replication factor C (activator 1) 1, 145kDa	ATGGACATTCGGAAATTCTTTGGAGTAATACCAAGTGGAAAGAAACTTGTAAGTGAAACAGTAAAGAAGAATGAGAAAACAAAGTCTGATGAAGAAACTTTAAAAGCAAAGAAAGGAATAAAGGAAATCAAGGTAAATAGCTCCCGTAAAGAGGATGACTTCAAACAAAAGCAACCAAGCAAGAAAAAGAGGATCATCTATGATTCAGATTCAGAGTCAGAGGAGACGTTGCAGGTAAAAAATGCCAAAAAGCCACCAGAAAAACTGCCAGTATCTTCTAAACCTGGTAAAATTTCACGGCAGGATCCTGTTACATACATTTCAGAAACAGATGAAGAAGATGACTTTATGTGTAAGAAGGCGGCCTCTAAATCAAAAGAGAATGGAAGATCTACAAAT…
REXO2	2101@B02	25996	REXO2	711	REX2, RNA exonuclease 2 homolog (S. cerevisiae)	ATGCTAGGCGGCTCCCTGGGCTCCAGGCTGTTGCGGGGTGTAGGTGGGAGTCACGGACGGTTCGGGGCCCGAGGTGTCCGCGAAGGTGGCGCAGCCATGGCGGCAGGGGAGAGCATGGCTCAGCGGATGGTCTGGGTGGACCTGGAGATGACAGGATTGGACATTGAGAAGGACCAGATTATTGAGATGGCCTGTCTGATAACTGACTCTGATCTCAACATTTTGGCTGAAGGTCCTAACCTGATTATAAAACAACCAGATGAGTTGCTGGACAGCATGTCAGATTGGTGTAAGGAGCATCACGGGAGGTCTGGCCTTACCAAGGCAGTGAAGGAGAGTACAATTACATTGCAGCAGGCAGAGTATGAATTTCTGTCCTTTGTACGACAGCAGACTCCT…
REC8	81104@A04	9985	REC8	1644	REC8 homolog (yeast)	ATGTTCTACTATCCCAACGTGCTTCAGCGCCACACCGGCTGCTTTGCCACCATCTGGCTGGCGGCGACTCGCGGCAGCCGGTTGGTGAAGCGCGAATACCTGAGGGTGAATGTGGTGAAAACCTGCGAGGAAATCCTCAATTACGTGCTGGTACGAGTGCAACCCCCGCAGCCCGGCCTGCCGCGGCCCCGCTTCTCCCTCTATCTCTCAGCCCAACTTCAGATCGGTGTGATCCGCGTCTATTCTCAACAATGCCAGTACCTCGTGGAGGACATCCAGCACATCTTGGAGCGCCTCCACCGTGCCCAGCTGCAGATCCGAATAGATATGGAGACTGAGCTACCCAGCCTGCTGCTTCCTAACCACCTGGCCATGATGGAGACCCTAGAAGATGCTCCA…
REC8	81104@A06	9985	REC8	1644	REC8 homolog (yeast)	ATGTTCTACTATCCCAACGTGCTTCAGCGCCACACCGGCTGCTTTGCCACCATCTGGCTGGCGGCGACTCGCGGCAGCCGGTTGGTGAAGCGCGAATACCTGAGGGTGAATGTGGTGAAAACCTGCGAGGAAATCCTCAATTACGTGCTGGTACGAGTGCAACCCCCGCAGCCCGGCCTGCCGCGGCCCCGCTTCTCCCTCTATCTCTCAGCCCAACTTCAGATCGGTGTGATCCGCGTCTATTCTCAACAATGCCAGTACCTCGTGGAGGACATCCAGCACATCTTGGAGCGCCTCCACCGTGCCCAGCTGCAGATCCGAATAGATATGGAGACTGAGCTACCCAGCCTGCTGCTTCCTAACCACCTGGCCATGATGGAGACCCTAGAAGATGCTCCA…
RDH14	2103@G09	57665	RDH14	1008	retinol dehydrogenase 14 (all-trans/9-cis/11-cis)	ATGGCAGTGGCCACTGCGGCGGCAGTACTGGCCGCTCTGGGCGGGGCGCTGTGGCTGGCGGCCCGCCGGTTCGTGGGGCCCAGGGTCCAGCGGCTGCGCAGAGGCGGGGACCCCGGCCTCATGCACGGGAAGACTGTGCTGATCACCGGGGCGAACAGCGGCCTGGGCCGCGCCACGGCCGCCGAGCTACTGCGCCTGGGAGCGCGGGTGATCATGGGCTGCCGGGACCGCGCGCGCGCCGAGGAGGCGGCGGGTCAGCTCCGCCGCGAGCTCCGCCAGGCCGCGGAGTGCGGCCCAGAGCCTGGCGTCAGCGGGGTGGGCGAGCTCATAGTCCGGGAGCTGGACCTCGCCTCGCTGCGCTCGGTGCGCGCCTTCTGCCAGGAAATGCTCCAGGAAGAG…
RBBP8	81019@B05	5932	RBBP8	2709	retinoblastoma binding protein 8	ATGAACATCTCGGGAAGCAGCTGTGGAAGCCCTAACTCTGCAGATACATCTAGTGACTTTAAGGACCTTTGGACAAAACTAAAAGAATGTCATGATAGAGAAGTACAAGGTTTACAAGTAAAAGTAACCAAGCTAAAACAGGAACGAATCTTAGATGCACAAAGACTAGAAGAATTCTTCACCAAAAATCAACAGCTGAGGGAACAGCAGAAAGTCCTTCATGAAACCATTAAAGTTTTAGAAGATCGGTTAAGAGCAGGCTTATGTGATCGCTGTGCAGTAACTGAAGAACATATGCGGAAAAAACAGCAAGAGTTTGAAAATATCCGGCAGCAGAATCTTAAACTTATTACAGAACTTATGAATGAAAGGAATACTCTACAGGAAGAAAATAAAAAG…
RAD52	2120@D02	5893	RAD52	1257	RAD52 homolog (S. cerevisiae)	ATGTCTGGGACTGAGGAAGCAATTCTTGGAGGACGTGACAGCCATCCTGCTGCTGGCGGCGGCTCAGTGTTATGCTTTGGACAGTGCCAGTACACAGCAGAAGAGTACCAGGCCATCCAGAAGGCCCTGAGGCAGAGGCTGGGCCCAGAATACATAAGTAGCCGCATGGCTGGCGGAGGCCAGAAGGTGTGCTACATTGAGGGTCATCGGGTAATTAATCTGGCCAATGAGATGTTTGGTTACAATGGCTGGGCACACTCCATCACGCAGCAGAATGTGGATTTTGTTGACCTCAACAATGGCAAGTTCTACGTGGGAGTCTGTGCATTTGTGAGGGTCCAGCTGAAGGATGGTTCATATCATGAAGATGTTGGTTATGGTGTTAGTGAGGGCCTCAAG…
RAD51D	81062@H08	5892	RAD51D	987	RAD51 homolog D (S. cerevisiae)	ATGGGCGTGCTCAGGGTCGGACTGTGCCCTGGCCTTACCGAGGAGATGATCCAGCTTCTCAGGAGCCACAGGATCAAGACAGTGGTGGACCTGGTTTCTGCAGACCTGGAAGAGGTAGCTCAGAAATGTGGCTTGTCTTACAAGGCCCTGGTTGCCCTGAGGCGGGTGCTGCTGGCTCAGTTCTCGGCTTTCCCCGTGAATGGCGCTGATCTCTACGAGGAACTGAAGACCTCCACTGCCATCCTGTCCACTGGCATTGGCAGTCTTGATAAACTGCTTGATGCTGGTCTCTATACTGGAGAAGTGACTGAAATTGTAGGAGGCCCAGGTAGCGGCAAAACTCAGGTATGTCTCTGTATGGCAGCAAATGTGGCCCATGGCCTGCAGCAAAACGTCCTA…
RAD51D	81030@E04	5892	RAD51D	630	RAD51 homolog D (S. cerevisiae)	ATGGCAGCAAATGTGGCCCATGGCCTGCAGCAAAACGTCCTATATGTAGATTCCAATGGAGGGCTGACAGCTTCCCGCCTCCTCCAGCTGCTTCAGGCTAAAACCCAGGATGAGGAGGAACAGGCAGAAGCTCTCCGGAGGATCCAGGTGGTGCATGCATTTGACATCTTCCAGATGCTGGATGTGCTGCAGGAGCTCCGAGGCACTGTGGCCCAGCAGGTGACTGGTTCTTCAGGAACTGTGAAGGTGGTGGTTGTGGACTCGGTCACTGCGGTGGTTTCCCCACTTCTGGGAGGTCAGCAGAGGGAAGGCTTGGCCTTGATGATGCAGCTGGCCCGAGAGCTGAAGACCCTGGCCCGGGACCTTGGCATGGCAGTGGTGGTGACCAACCACATAACT…
RAD51C	81011@C09	5889	RAD51C	405	RAD51 homolog C (S. cerevisiae)	ATGCGCGGGAAGACGTTCCGCTTTGAAATGCAGCGGGATTTGGTGAGTTTCCCGCTGTCTCCAGCGGTGCGGGTGAAGCTGGTGTCTGCGGGGTTCCAGACTGCTGAGGAACTCCTAGAGGTGAAACCCTCCGAGCTTAGCAAAGAAGTTGGGATATCTAAAGCAGAAGCCTTAGAAACTCTGCAAATTATCAGAAGAGAATGTCTCACAAATAAACCAAGATATGCTGGTACATCTGAGTCACACAAGAAGTGTACAGCACTGGAACTTCTTGAGCAGGAGCATACCCAGGGCTTCATAATCACCTTCTGTTCAGCACTAGATGATATTCTTGGGGGTGGAGTGCCCTTAATGAAAACAACAGAAATTTGTGGTGCACCAGGTGTTGGAAAAACACAA…
RAD51B	81073@F08	5890	RAD51B	1155	RAD51 homolog B (S. cerevisiae)	ATGGGTAGCAAGAAACTAAAACGAGTGGGTTTATCACAAGAGCTGTGTGACCGTCTGAGTAGACATCAGATCCTTACCTGTCAGGACTTTTTATGTCTTTCCCCACTGGAGCTTATGAAGGTGACTGGTCTGAGTTATCGAGGTGTCCATGAACTTCTATGTATGGTCAGCAGGGCCTGTGCCCCAAAGATGCAAACGGCTTATGGGATAAAAGCACAAAGGTCTGCTGATTTCTCACCAGCATTCTTATCTACTACCCTTTCTGCTTTGGACGAAGCCCTGCATGGTGGTGTGGCTTGTGGATCCCTCACAGAGATTACAGGTCCACCAGGTTGTGGAAAAACTCAGTTTTGTATAATGATGAGCATTTTGGCTACATTACCCACCAACATGGGAGGA…
RAD51AP1	81065@B05	10635	RAD51AP1	1059	RAD51 associated protein 1	ATGGTGCGGCCTGTGAGACATAAGAAACCAGTCAATTACTCACAGTTTGACCACTCTGACAGTGATGATGATTTTGTTTCTGCAACTGTACCTTTAAACAAGAAATCCAGAACAGCACCAAAGGAGTTAAAACAAGATAAACCAAAACCTAACTTGAACAATCTCCGGAAAGAAGAAATCCCAGTACAAGAGAAAACCCCTAAAAAAAGACTCCCTGAAGGTACTTTTAGTATTCCAGCTAGTGCAGTGCCTTGTACAAAGATGGCTTTAGATGACAAGCTCTACCAGAGAGACTTAGAAGTTGCACTAGCTTTATCAGTGAAGGAACTTCCAACAGTCACCACTAATGTGCAGAACTCTCAAGATAAAAGCATTGAAAAACATGGCAGTAGTAAAATA…
RAD51AP1	81063@B07	10635	RAD51AP1	1008	RAD51 associated protein 1	ATGGTGCGGCCTGTGAGACATAAGAAACCAGTCAATTACTCACAGTTTGACCACTCTGACAGTGATGATGATTTTGTTTCTGCAACTGTACCTTTAAACAAGAAATCCAGAACAGCACCAAAGGAGTTAAAACAAGATAAACCAAAACCTAACTTGAACAATCTCCGGAAAGAAGAAATCCCAGTACAAGAGAAAACCCCTAAAAAAAGGATGGCTTTAGATGACAAGCTCTACCAGAGAGACTTAGAAGTTGCACTAGCTTTATCAGTGAAGGAACTTCCAACAGTCACCACTAATGTGCAGAACTCTCAAGATAAAAGCATTGAAAAACATGGCAGTAGTAAAATAGAAACAATGAATAAGTCTCCTCATATCTCTAATTGCAGTGTAGCCAGTGAT…
RAD51AP1	81043@A02	10635	RAD51AP1	798	RAD51 associated protein 1	ATGGCTTTAGATGACAAGCTCTACCAGAGAGACTTAGAAGTTGCACTAGCTTTATCAGTGAAGGAACTTCCAACAGTCACCACTAATGTGCAGAACTCTCAAGATAAAAGCATTGAAAAACATGGCAGTAGTAAAATAGAAACAATGAATAAGTCTCCTCATATCTCTAATTGCAGTGTAGCCAGTGATTATTTAGATTTGGATAAGATTACTGTGGAAGATGATGTTGGTGGTGTTCAAGGGAAAAGAAAAGCAGCATCTAAAGCTGCAGCACAGCAGAGGAAGATTCTTCTGGAAGGCAGTGATGGTGATAGTGCTAATGACACTGAACCAGACTTTGCACCTGGTGAAGATTCTGAGGATGATTCTGATTTTTGTGAGAGTGAGGATAATGACGAA…
RAD51	81116@B12	5888	RAD51	729	RAD51 homolog (S. cerevisiae)	ATGGCAATGCAGATGCAGCTTGAAGCAAATGCAGATACTTCAGTGGAAGAAGAAAGCTTTGGCCCACAACCCATTTCACGGTTAGAGCAGTGTGGCATAAATGCCAACGATGTGAAGAAATTGGAAGAAGCTGGATTCCATACTGTGGAGGCTGTTGCCTATGCGCCAAAGAAGGAGCTAATAAATATTAAGGGAATTAGTGAAGCCAAAGCTGATAAAATTCTGGCAGTGGCTGAGAGGTATGGTCTCTCTGGCAGTGATGTCCTGGATAATGTAGCATATGCTCGAGCGTTCAACACAGACCACCAGACCCAGCTCCTTTATCAAGCATCAGCCATGATGGTAGAATCTAGGTATGCACTGCTTATTGTAGACAGTGCCACCGCCCTTTACAGAACA…
RAD23B	81076@D07	5887	RAD23B	1230	RAD23 homolog B (S. cerevisiae)	ATGCAGGTCACCCTGAAGACCCTCCAGCAGCAGACCTTCAAGATAGACATTGACCCCGAGGAGACGGTGAAAGCACTGAAAGAGAAGATTGAATCTGAAAAGGGGAAAGATGCCTTTCCAGTAGCAGGTCAAAAATTAATTTATGCAGGCAAAATCCTCAATGATGATACTGCTCTCAAAGAATATAAAATTGATGAGAAAAACTTTGTGGTGGTTATGGTGACCAAACCCAAAGCAGTGTCCACACCAGCACCAGCTACAACTCAGCAGTCAGCTCCTGCCAGCACTACAGCAGTTACTTCCTCCACCACCACAACTGTGGCTCAGGCTCCAACCCCTGTCCCTGCCTTGGCCCCCACTTCCACACCTGCATCCATCACTCCAGCATCAGCGACAGCA…
RAD23A	81071@C04	5886	RAD23A	1092	RAD23 homolog A (S. cerevisiae)	ATGGCCGTCACCATCACGCTCAAAACGCTGCAGCAGCAGACCTTCAAGATCCGCATGGAGCCTGACGAGACGGTGAAGGTGCTAAAGGAGAAGATAGAAGCTGAGAAGGGTCGTGATGCCTTCCCCGTGGCTGGACAGAAACTCATCTATGCCGGCAAGATCTTGAGTGACGATGTCCCTATCAGGGACTATCGCATCGATGAGAAGAACTTTGTGGTCGTCATGGTGACCAAGACCAAAGCCGGCCAGGGTACCTCAGCACCCCCAGAGGCCTCACCCACAGCTGCCCCAGAGTCCTCTACATCCTTCCCGCCTGCCCCCACCTCAGGCATGTCCCATCCCCCACCTGCCGCCAGAGAGGACAAGAGCCCATCAGAGGAATCCGCCCCCACGACGTCC…
RAD1	81050@A06	5810	RAD1	849	RAD1 homolog (S. pombe)	ATGCCCCTTCTGACCCAACAGATCCAAGACGAGGATGATCAGTACAGCCTTGTGGCCAGCCTTGACAACGTTAGGAATCTCTCCACTATCTTGAAAGCTATTCATTTCCGAGAACATGCCACGTGTTTCGCAACTAAAAATGGTATCAAAGTAACAGTGGAAAATGCAAAGTGTGTGCAAGCAAATGCTTTTATTCAGGCTGGAATATTTCAGGAGTTTAAAGTTCAGGAAGAGTCTGTTACTTTTCGAATTAATTTAACTGTCCTTTTAGACTGTTTATCTATTTTTGGATCAAGTCCTATGCCAGGGACTTTAACTGCACTTCGAATGTGTTACCAAGGTTATGGTTACCCTTTGATGCTGTTCCTGGAAGAAGGAGGAGTGGTGACAGTCTGCAAA…
PROKR1	81081@D02	10887	PROKR1	1182	prokineticin receptor 1	ATGGAGACCACCATGGGGTTCATGGATGACAATGCCACCAACACTTCCACCAGCTTCCTTTCTGTGCTCAACCCTCATGGAGCCCATGCCACTTCCTTCCCATTCAACTTCAGCTACAGCGACTATGATATGCCTTTGGATGAAGATGAGGATGTGACCAATTCCAGGACGTTCTTTGCTGCCAAGATTGTCATTGGGATGGCCCTGGTGGGCATCATGCTGGTCTGCGGCATTGGAAACTTCATCTTTATCGCTGCCCTGGTCCGCTACAAGAAACTGCGCAACCTCACCAACCTGCTCATCGCCAACCTGGCCATCTCTGACTTCCTGGTGGCCATTGTCTGCTGCCCCTTTGAGATGGACTACTATGTGGTGCGCCAGCTCTCCTGGGAGCACGGC…
PRMT6	81054@D03	55170	PRMT6	951	protein arginine methyltransferase 6	ATGATCGCGGACCGCGTCCGCACCGATGCCTACCGCCTGGGTATCCTTCGGAACTGGGCAGCACTGCGAGGCAAGACGGTACTGGACGTGGGCGCGGGCACCGGCATTCTGAGCATCTTCTGTGCCCAGGCCGGGGCCCGGCGCGTGTACGCGGTAGAGGCCAGCGCCATCTGGCAACAGGCCCGGGAGGTGGTGCGGTTCAACGGGCTGGAGGACCGGGTGCACGTCCTGCCGGGACCAGTGGAGACTGTAGAGTTGCCGGAACAGGTGGATGCCATCGTGAGCGAGTGGATGGGCTACGGACTCCTGCACGAGTCCATGCTGAGCTCCGTCCTCCACGCGCGAACCAAGTGGCTGAAGGAGGGCGGTCTTCTCCTGCCGGCCTCCGCCGAGCTCTTC…
POLR2L	81002@E03	5441	POLR2L	204	polymerase (RNA) II (DNA directed) polypeptide L, 7.6kDa	ATGATCATCCCTGTACGCTGCTTCACTTGTGGCAAGATCGTCGGCAACAAGTGGGAGGCTTACCTGGGGCTGCTGCAGGCCGAGTACACCGAGGGGGATGCGCTGGATGCCCTGGGCCTGAAGCGCTACTGCTGCCGCCGGATGCTGCTGGCCCACGTGGACCTGATCGAGAAGCTGCTCAATTATGCACCCCTGGAGAAGTGA
POLR2J	81032@H10	5439	POLR2J	354	polymerase (RNA) II (DNA directed) polypeptide J, 13.3kDa	ATGAACGCCCCTCCAGCCTTCGAGTCGTTCTTGCTCTTCGAGGGCGAGAAGAAGATCACCATTAACAAGGACACCAAGGTACCCAATGCCTGTTTATTCACCATCAACAAAGAAGACCACACACTGGGAAACATCATTAAATCACAACTCCTAAAAGACCCGCAAGTGCTATTTGCTGGCTACAAAGTCCCCCACCCCTTGGAGCACAAGATCATCATCCGAGTGCAGACCACGCCGGACTACAGCCCCCAGGAAGCCTTTACCAACGCCATCACCGACCTCATCAGTGAGCTGTCCCTGCTGGAGGAGCGCTTTCGGGTGGCCATAAAAGACAAGCAGGAAGGAATTGAGTAG
POLR2I	81009@C03	5438	POLR2I	378	polymerase (RNA) II (DNA directed) polypeptide I, 14.5kDa	ATGGAGCCCGACGGGACTTACGAGCCGGGCTTCGTGGGTATTCGCTTCTGCCAGGAATGTAACAACATGCTGTACCCCAAGGAAGACAAGGAGAACCGCATTCTGCTCTACGCGTGCCGGAACTGTGATTACCAGCAGGAGGCCGACAACAGCTGCATCTATGTCAACAAGATCACGCACGAAGTGGACGAACTGACCCAGATTATCGCCGACGTGTCCCAGGACCCCACGTTGCCGCGGACCGAGGACCACCCGTGCCAAAAGTGCGGCCACAAGGAGGCTGTGTTCTTCCAGTCACACAGTGCGCGGGCCGAGGACGCCATGCGCCTTTACTACGTGTGCACAGCCCCACACTGCGGCCACCGCTGGACCGAGTGA
POLR2H	81090@E09	5437	POLR2H	453	polymerase (RNA) II (DNA directed) polypeptide H	ATGGCGGGCATCCTGTTTGAGGATATTTTCGATGTGAAGGATATTGACCCGGAGGGCAAGAAGTTTGACCGAGTGTCTCGACTGCATTGTGAGAGTGAATCTTTCAAGATGGATCTAATCTTAGATGTAAACATTCAAATTTACCCTGTAGACTTGGGTGACAAGTTTCGGTTGGTCATAGCTAGTACCTTGTATGAAGATGGTACCCTGGATGATGGTGAATACAACCCCACTGATGATAGGCCTTCCAGGGCTGACCAGTTTGAGTATGTAATGTATGGAAAAGTGTACAGGATTGAGGGAGATGAAACTTCTACTGAAGCAGCAACACGCCTCTCTGCGTACGTGTCCTATGGGGGCCTGCTCATGAGGCTGCAGGGGGATGCCAACAACCTGCAT…
POLR2G	81114@C12	5436	POLR2G	519	polymerase (RNA) II (DNA directed) polypeptide G	ATGTTCTACCATATCTCCCTAGAGCACGAAATCCTGCTGCACCCGCGCTACTTCGGCCCCAACTTGCTCAACACGGTGAAGCAGAAGCTCTTCACCGAGGTGGAGGGGACCTGCACAGGGAAGTATGGCTTTGTAATTGCTGTCACCACCATTGACAATATTGGTGCTGGTGTGATCCAGCCAGGCCGAGGCTTTGTCCTTTATCCAGTTAAGTACAAGGCCATTGTTTTCCGGCCATTTAAAGGGGAGGTCGTGGATGCTGTTGTCACTCAGGTCAACAAGGTTGGACTCTTCACAGAAATTGGGCCCATGTCTTGCTTCATCTCTCGACATTCCATCCCTTCAGAGATGGAGTTTGATCCTAACTCCAACCCACCATGTTACAAGACAATGGATGAG…
POLR2F	81009@F04	5435	POLR2F	384	polymerase (RNA) II (DNA directed) polypeptide F	ATGTCAGACAACGAGGACAATTTTGATGGCGACGACTTTGATGATGTGGAGGAGGATGAAGGGCTAGATGACTTGGAGAATGCCGAAGAGGAAGGCCAGGAGAATGTCGAGATCCTCCCCTCTGGGGAGCGACCGCAGGCCAACCAGAAGCGAATCACCACACCATACATGACCAAGTACGAGCGAGCCCGCGTGCTGGGCACCCGAGCGCTCCAGATTGCGATGTGTGCCCCTGTGATGGTGGAGCTGGAGGGGGAGACAGATCCTCTGCTCATTGCCATGAAGGAACTCAAGGCCCGAAAGATCCCCATCATCATTCGCCGTTACCTGCCAGATGGGAGCTATGAAGACTGGGGGGTGGACGAGCTCATCATCACCGACTGA
POLR2E	81030@D10	5434	POLR2E	633	polymerase (RNA) II (DNA directed) polypeptide E, 25kDa	ATGGACGACGAGGAGGAGACGTACCGGCTCTGGAAAATCCGCAAGACCATCATGCAGCTGTGCCACGACCGTGGCTATCTGGTGACCCAGGACGAGCTTGACCAGACCCTGGAGGAGTTCAAAGCCCAATTTGGGGACAAGCCGAGTGAGGGGCGGCCGCGGCGCACGGACCTCACCGTGCTGGTGGCCCACAACGATGACCCCACCGACCAGATGTTTGTGTTCTTTCCAGAGGAGCCCAAGGTGGGCATCAAGACCATCAAGGTGTACTGCCAGCGCATGCAGGAGGAGAACATCACACGGGCTCTCATCGTGGTGCAGCAGGGCATGACACCCTCCGCCAAGCAGTCCCTGGTCGACATGGCCCCCAAGTACATCCTGGAGCAGTTTCTGCAGCAG…
POLR2D	81011@D03	5433	POLR2D	429	polymerase (RNA) II (DNA directed) polypeptide D	ATGGCGGCGGGTGGCAGCGATCCGCGGGCTGGCGACGTAGAGGAGGACGCCTCACAGCTCATCTTTCCTAAAGAGTTTGAAACAGCTGAGACACTTCTAAATTCAGAAGTTCATATGCTTCTGGAACATCGAAAGCAGCAGAATGAGAGTGCAGAGGACGAACAGGAGCTCTCAGAAGTCTTCATGAAAACATTAAACTACACAGCCCGTTTCAGTCGTTTCAAAAACAGAGAGACCATTGCCAGTGTTCGTAGCTTGCTACTCCAGAAAAAGCTTCATAAGTTTGAGTTGGCCTGTTTGGCCAACCTTTGCCCAGAGACTGCTGAGGAGTCCAAGGCTCTAATCCCAAGCTTGGAGGGACGGTTTGAAGATGAGGAGCTGCAGCAGATTCTTGATGAT…
POLR2C	81080@A09	5432	POLR2C	828	polymerase (RNA) II (DNA directed) polypeptide C, 33kDa	ATGCCGTACGCCAACCAGCCTACCGTGCGGATCACGGAGCTCACTGACGAGAATGTCAAGTTCATCATCGAGAACACCGACCTGGCGGTGGCCAATTCGATTCGGAGGGTCTTCATCGCTGAGGTTCCCATAATAGCCATTGACTGGGTTCAGATTGATGCCAATTCCTCAGTTCTTCATGATGAATTCATTGCTCACAGGCTTGGATTAATTCCCCTCATTAGTGATGACATTGTGGACAAGCTGCAGTACTCTCGGGACTGCACATGTGAGGAGTTCTGCCCCGAGTGCTCGGTGGAGTTCACCCTCGATGTGCGGTGCAATGAAGACCAGACGCGACATGTCACGTCTCGAGACCTCATCTCCAACAGCCCCCGGGTCATTCCGGTGACATCCCGG…
POLR2C	81048@C11	5432	POLR2C	828	polymerase (RNA) II (DNA directed) polypeptide C, 33kDa	ATGCCGTACGCCAACCAGCCTACCGTGCGGATCACGGAGCTCACTGACGAGAATGTCAAGTTCATCATCGAGAACACCGACCTGGCGGTGGCCAATTCGATTCGGAGGGTCTTCATCGCTGAGGTTCCCATAATAGCCATTGACTGGGTTCAGATTGATGCCAATTCCTCAGTCCTTCATGATGAATTCATTGCTCACAGGCTTGGATTAATTCCCCTCATTAGTGATGACATTGTGGACAAGCTGCAGTACTCTCGGGACTGCACATGTGAGGAGTTCTGCCCCGAGTGCTCGGTGGAGTTCACCCTCGATGTGCGGTGCAATGAAGACCAGACGCGACATGTCACGTCTCGAGACCTCATCTCCAACAGCCCCCGGGTCATTCCGGTGACATCCCGG…
POLR2A	81099@H09	5430	POLR2A	1701	polymerase (RNA) II (DNA directed) polypeptide A, 220kDa	ATGCACGGGGGTGGCCCCCCCTCGGGGGACAGCGCATGCCCGCTGCGCACCATCAAGAGAGTCCAGTTCGGAGTCCTGAGTCCGGATGAACTGAAGCGAATGTCTGTGACGGAGGGTGGCATCAAATACCCAGAGACGACTGAGGGAGGCCGCCCCAAGCTTGGGGGGCTGATGGACCCGAGGCAGGGGGTGATTGAGCGGACTGGCCGCTGCCAAACATGTGCAGGAAACATGACAGAGTGTCCTGGCCACTTTGGCCACATTGAACTGGCCAAGCCTGTGTTTCACGTGGGCTTCCTGGTGAAGACAATGAAAGTTTTGCGCTGTGTCTGCTTCTTCTGCTCCAAACTGCTTGTGGACTCTAACAACCCAAAGATCAAGGATATCCTGGCTAAGTCC…
POLQ	2115@H11	10721	POLQ	7770	polymerase (DNA directed), theta	ATGAATCTTCTGCGTCGGAGTGGGAAACGGCGGCGTTCAGAATCAGGCTCAGATTCGTTCTCGGGAAGCGGCGGTGACAGCAGTGCCAGCCCCCAGTTCCTCTCCGGGTCCGTGCTGAGCCCGCCGCCCGGCCTTGGTCGCTGCCTGAAGGCCGCAGCTGCAGGAGAATGCAAGCCTACAGTTCCTGACTACGAAAGAGACAAGCTACTATTGGCAAACTGGGGACTTCCTAAAGCAGTTCTGGAAAAATACCACAGTTTTGGTGTAAAAAAGATGTTTGAATGGCAGGCAGAGTGCCTTTTGCTTGGACAAGTCCTGGAAGGAAAGAATTTAGTTTATTCAGCTCCTACAAGTGCTGGGAAGACTCTTGTGGCAGAATTACTTATTTTGAAGCGGGTT…
POLN	2110@H01	353497	POLN	2700	polymerase (DNA directed) nu	ATGGAAAATTATGAGGCATTGGTAGGCTTTGATCTCTGTAATACACCGCTCTCCAGTGTTGCTCAGAAGATTATGTCTGCTATGCATTCAGGTGATTTAGTGGATTCTAAGACTTGGGGAAAGAGTACAGAGACTATGGAAGTGATAAACAAGTCCAGTGTTAAGTATTCAGTACAACTTGAAGACAGGAAGACTCAATCACCAGAAAAAAAGGATCTTAAATCTTTAAGAAGTCAGACATCAAGAGGTTCTGCCAAGCTGTCTCCTCAGTCCTTCAGTGTCAGGCTCACAGATCAGCTGTCTGCTGACCAAAAACAGAAGAGCATCAGCTCATTGACTCTTTCAAGTTGTTTAATTCCACAGTATAATCAAGAGGCTTCAGTTCTACAGAAAAAGGGG…
POLL	81052@H08	27343	POLL	897	polymerase (DNA directed), lambda	ATGCATCATCAAAAGTACTTGCAAAGATTCCTAGGAGGGAAGAGGGAGAAGAAGCAGAAGGAGGCCTGCAGTATCCCTGGGATTGGGAAGCGGATGGCTGAGAAAATCATAGAGATCCTGGAGAGCGGGCATTTGCGGAAGCTGGACCATATCAGTGAGAGCGTGCCTGTCTTGGAGCTCTTCTCCAACATCTGGGGAGCTGGGACCAAGACTGCCCAGATGTGGTACCAACAGGGCTTCCGAAGTCTGGAAGACATCCGCAGCCAGGCCTCCCTGACAACCCAGCAGGCCATCGGCCTGAAGCATTACAGTGACTTCCTGGAACGTATGCCCAGGGAGGAGGCTACAGAGATTGAGCAGACAGTCCAGAAAGCAGCCCAGGCCTTTAACTCTGGGCTG…
POLK	81103@B03	51426	POLK	1419	polymerase (DNA directed) kappa	ATGGATAGCACAAAGGAGAAGTGTGACAGTTACAAAGATGATCTTCTGCTTAGGATGGGACTTAATGATAATAAAGCAGGAATGGAAGGATTAGATAAAGAGAAAATTAACAAAATTATAATGGAAGCCACGAAGGGGTCCAGATTTTATGGAAATGAGCTCAAGAAAGAAAAGCAAGTCAACCAACGAATTGAAAATATGATGCAACAAAAAGCTCAAATCACCAGCCAACAGCTAAGAAAAGCACAATTACAGGTTGACAGATTTGCAATGGAATTAGAACAAAGCCGAAATTTGAGCAATACCATAGTGCACATTGACATGGATGCTTTCTATGCAGCTGTAGAAATGAGGGACAATCCAGAATTGAAGGATAAACCCATTGCTGTAGGATCAATG…
POLE2	81096@A08	5427	POLE2	1584	polymerase (DNA directed), epsilon 2 (p59 subunit)	ATGGCGCCGGAGCGGCTGCGGAGCCGGGCGCTCTCCGCCTTCAAGTTGCGGGGCTTGCTGCTCCGTGGTGAAGCTATTAAGTACCTCACAGAAGCTCTTCAGTCTATCAGTGAATTAGAGCTTGAAGATAAACTGGAAAAGATAATTAATGCAGTTGAGAAGCAACCCTTGTCATCAAACATGATTGAACGATCTGTGGTGGAAGCAGCAGTCCAGGAATGCAGTCAGTCTGTTGATGAAACTATAGAGCACGTTTTCAATATCATAGGAGCATTTGATATTCCACGCTTTGTGTACAATTCAGAAAGAAAAAAATTTCTTCCTCTGTTAATGACCAACCACCCTGCACCAAATTTATTTGGAACACCAAGAGATAAAGCAGAGATGTTTCGTGAGCGA…
POLE2	81125@F09	5427	POLE2	1509	polymerase (DNA directed), epsilon 2 (p59 subunit)	ATGGCGCCGGAGCGGCTGCGGAGCCGGGCGCTCTCCGCCTTCAAGTTGCGGGGCTTGCTGCTCCGTGGTGAAGCTATTAAGTACCTCACAGAAGCTCTTCAGTCTATCAGTGAATTAGAGCTTGAAGATAAACTGGAAAAGATAATTAATGCAGTTGAGAAGCAACCCTTGTCATCAAACATGATTGAACGATCTGTGGTGGAAGCAGCAGTCCAGGAATGCAGTCAGTCTGTTGATGAAACTATAGAGCACGTTTTCAATATCATAGGAGCATTTGATATTCCACGCTTTGTGTACAATTCAGAAAGAAAAAAATTTCTTCCTCTGTTAATGACCAACCACCCTGCACCAAATTTATTTGGAACACCAAGAGATAAAGCAGAGATGTTTCGTGAGCGA…
POLE	81071@C10	5426	POLE	1113	polymerase (DNA directed), epsilon	ATGGATCCATCTAACTATGGCGGAATCAAAGGAAAAGTTTCATCTCGTATTCACTGTGGACTGCAAGACTCCCAGAAAGCAGGGGGAGCAGAGGATGAGCAGGAAAATGAGGACGATGAGGAGGAAAGAGATGGGGAGGAGGAGGAAGAGGCGGAGGAATCCAACGTGGAGGATTTACTGGAAAACAACTGGAACATTTTGCAGTTTTTGCCACAGGCAGCCTCCTGCCAGAACTACTTCCTCATGATTGTTTCAGCGTACATCGTGGCCGTGTACCACTGCATGAAGGACGGGCTGAGGCGCAGTGCTCCAGGGAGCACCCCCGTGAGGAGGAGGGGGGCCAGCCAGCTCTCCCAGGAGGCCGAGGGGGCGGTCGGAGCCCTTCCCGGAATGATCACC…
POLD4	81001@B08	57804	POLD4	105	polymerase (DNA-directed), delta 4	ATGGGCCGGAAGCGGCTCATCACTGATTCCTACCCGGTTGTGAAGAGGAGGGAGGGGCCCGCTGGGCACAGCAAGGGGGAGCTGGCACCCGAGCTAGGTCTCTGA
POLD3	81066@D05	10714	POLD3	1083	polymerase (DNA-directed), delta 3, accessory subunit	ATGCTAAAGGACAGTGGGCCTCTGTTCAATACTGACTATGACATCCTTAAAAGCAACTTGCAGAACTGCAGCAAATTTAGTGCTATACAATGTGCAGCTGCCGTCCCTAGAGCTCCTGCTGAATCCTCTTCGTCTTCCAAAAAGTTTGAGCAGTCACATCTTCACATGTCAAGTGAGACACAAGCCAACAATGAGCTGACCACCAATGGTCATGGCCCACCTGCATCCAAGCAGGTTTCCCAGCAGCCCAAAGGAATTATGGGAATGTTTGCCTCCAAAGCTGCTGCTAAAACCCAAGAAACCAACAAGGAAACGAAAACAGAGGCTAAAGAAGTAACAAATGCATCTGCAGCAGGCAACAAGGCACCAGGGAAAGGGAATATGATGAGCAACTTTTTT…
POLD2	81086@A06	5425	POLD2	1410	polymerase (DNA directed), delta 2, regulatory subunit 50kDa	ATGTTTTCTGAGCAGGCTGCCCAGAGGGCCCACACTCTACTGTCCCCACCATCAGCCAACAATGCCACCTTTGCCCGGGTGCCAGTGGCAACCTACACCAACTCCTCACAACCCTTCCGGCTAGGAGAGCGCAGCTTTAGCCGGCAGTATGCCCACATTTATGCCACCCGCCTCATCCAAATGAGACCCTTCCTGGAGAACCGGGCCCAGCAGCACTGGGGCAGTGGAGTGGGAGTGAAGAAGCTGTGTGAACTGCAGCCTGAGGAGAAGTGCTGTGTGGTGGGCACTCTGTTCAAGGCCATGCCGCTGCAGCCCTCCATCCTGCGGGAGGTCAGCGAGGAGCACAACCTGCTCCCCCAGCCTCCTCGGAGTAAATACATACACCCAGATGACGAGCTG…
POLD1	81138@F02	5424	POLD1	3324	polymerase (DNA directed), delta 1, catalytic subunit 125kDa	ATGGATGGCAAGCGGCGGCCAGGCCCAGGGCCCGGGGTGCCCCCAAAGCGGGCCCGTGGGGGCCTCTGGGATGATGATGATGCACCTCGGCCATCCCAATTCGAGGAGGACCTGGCACTGATGGAGGAGATGGAGGCAGAACACAGGCTGCAGGAGCAGGAGGAGGAGGAGCTGCAGTCAGTCCTGGAGGGGGTTGCAGACGGGCAGGTCCCACCATCAGCCATAGATCCTCGCTGGCTTCGGCCCACACCACCAGCGCTGGACCCCCAGACAGAGCCCCTCATCTTCCAACAGTTGGAGATTGACCATTATGTGGGCCCAGCACAGCCTGTGCCTGGGGGGCCCCCACCATCCCACGGCTCCGTGCCTGTGCTCCGCGCCTTCGGGGTCACCGATGAG…
POLB	81069@C10	5423	POLB	1008	polymerase (DNA directed), beta	ATGAGCAAACGGAAGGCGCCGCAGGAGACTCTCAACGGGGGAATCACCGACATGCTCACAGAACTCGCAAACTTTGAGAAGAACGTGAGCCAAGCTATCCACAAGTACAATGCTTACAGAAAAGCAGCATCTGTTATAGCAAAATACCCACACAAAATAAAGAGTGGAGCTGAAGCTAAGAAATTGCCTGGAGTAGGAACAAAAATTGCTGAAAAGATTGATGAGTTTTTAGCAACTGGAAAATTACGTAAACTGGAAAAGATTCGGCAGGATGATACGAGTTCATCCATCAATTTCCTGACTCGAGTTAGTGGCATTGGTCCATCTGCTGCAAGGAAGTTTGTAGATGAAGGAATTAAAACACTAGAAGATCTCAGAAAAAATGAAGATAAATTGAAC…
PNKP	81088@A04	11284	PNKP	1449	polynucleotide kinase 3'-phosphatase	ATGCAAATCCTGACTCCACCCCTCCAATCCTCAGTGGAGCTGGTCGCAGATCCTGAGACCCGGACAGTGGCAGTGAAACAGCTGGGAGTTAACCCCTCAACTACCGGGACCCAGGAGTTGAAGCCGGGGTTGGAGGGCTCTCTGGGGGTGGGGGACACACTGTATTTGGTCAATGGCCTCCACCCACTGACCCTGCGCTGGGAAGAGACCCGCACACCAGAATCCCAGCCAGATACTCCGCCTGGCACCCCTCTGGTGTCCCAAGATGAGAAGAGAGATGCTGAGCTGCCGAAGAAGCGTATGCGGAAGTCAAACCCCGGCTGGGAGAACTTGGAGAAGTTGCTAGTGTTCACCGCAGCTGGGGTGAAACCCCAGGGCAAGGTGGCTGGCTTTGATCTG…
PMS1	81025@G04	5378	PMS1	501	PMS1 postmeiotic segregation increased 1 (S. cerevisiae)	ATGAAACAATTGCCTGCGGCAACAGTTCGACTCCTTTCAAGTTCTCAGATCATCACTTCGGTGGTCAGTGTTGTAAAAGAGCTTATTGAAAACTCCTTGGATGCTGGTGCCACAAGCGTAGATGTTAAACTGGAGAACTATGGATTTGATAAAATTGAGGTGCGAGATAACGGGGAGGGTATCAAGGCTGTTGATGCACCTGTAATGGCAATGAAGTACTACACCTCAAAAATAAATAGTCATGAAGATCTTGAAAATTTGACAACTTACGGTTTTCGTGGAGAAGCCTTGGGGTCAATTTGTTGTATAGCTGAGGTTTTAATTACAACAAGAACGGCTGCTGATAATTTTAGCACCCAGTATGTTTTAGATGGCAGTGGCCACATACTTTCTCAGAAA…
PMS1	81014@F04	5378	PMS1	2010	PMS1 postmeiotic segregation increased 1 (S. cerevisiae)	ATGAAACAATTGCCTGCGGCAACAGTTCGACTCCTTTCAAGTTCTCAGATCATCACTTCGGTGGTCAGTGTTGTAAAAGAGCTTATTGAAAACTCCTTGGATGCTGGTGCCACAAGCGTAGATGTTAAACTGGAGAACTATGGATTTGATAAAATTGAGGTGCGAGATAACGGGGAGGGTATCAAGGCTGTTGATGCACCTGTAATGGCAATGAAGTACTACACCTCAAAAATAAATAGTCATGAAGATCTTGAAAATTTGACAACTTACGGTTTTCGTGGAGAAGCCTTGGGGTCAATTTGTTGTATAGCTGAGGTTTTAATTACAACAAGAACGGCTGCTGATAATTTTAGCACCCAGTATGTTTTAGATGGCAGTGGCCACATACTTTCTCAGAAA…
PIAS1	81013@D12	8554	PIAS1	1956	protein inhibitor of activated STAT, 1	ATGGCGGACAGTGCGGAACTAAAGCAAATGGTTATGAGCCTTAGAGTTTCTGAACTCCAAGTACTGTTGGGCTACGCCGGGAGAAACAAGCACGGACGCAAACACGAACTTCTCACAAAAGCCCTGCATTTGCTAAAGGCTGGCTGTAGTCCTGCTGTGCAAATGAAAATTAAGGAACTCTATAGGCGGCGGTTCCCACAGAAAATCATGACGCCTGCAGACTTGTCCATCCCCAACGTACATTCAAGTCCTATGCCAGCAACTTTGTCTCCATCTACCATTCCACAACTCACTTACGATGGTCACCCTGCATCATCGCCATTACTCCCTGTTTCTCTTCTGGGACCTAAACATGAACTGGAACTCCCACATCTTACATCAGCTCTTCACCCAGTCCAT…
PCNA	81042@F10	5111	PCNA	786	proliferating cell nuclear antigen	ATGTTCGAGGCGCGCCTGGTCCAGGGCTCCATCCTCAAGAAGGTGTTGGAGGCACTCAAGGACCTCATCAACGAGGCCTGCTGGGATATTAGCTCCAGCGGTGTAAACCTGCAGAGCATGGACTCGTCCCACGTCTCTTTGGTGCAGCTCACCCTGCGGTCTGAGGGCTTCGACACCTACCGCTGCGACCGCAACCTGGCCATGGGCGTGAACCTCACCAGTATGTCCAAAATACTAAAATGCGCCGGCAATGAAGATATCATTACACTAAGGGCCGAAGATAACGCGGATACCTTGGCGCTAGTATTTGAAGCACCAAACCAGGAGAAAGTTTCAGACTATGAAATGAAGTTGATGGATTTAGATGTTGAACAACTTGGAATTCCAGAACAGGAGTAC…
PARP2	2115@G11	10038	PARP2	1749	poly (ADP-ribose) polymerase 2	ATGGCGGCGCGGCGGCGACGGAGCACCGGCGGCGGCAGGGCGAGAGCATTAAATGAAAGCAAAAGAGTTAATAATGGCAACACGGCTCCAGAAGACTCTTCCCCTGCCAAGAAAACTCGTAGATGCCAGAGACAGGAGTCGAAAAAGATGCCTGTGGCTGGAGGAAAAGCTAATAAGGACAGGACAGAAGACAAGCAAGATGGTATGCCAGGAAGGTCATGGGCCAGCAAAAGGGTCTCTGAATCTGTGAAGGCCTTGCTGTTAAAGGGCAAAGCTCCTGTGGACCCAGAGTGTACAGCCAAGGTGGGGAAGGCTCATGTGTATTGTGAAGGAAATGATGTCTATGATGTCATGCTAAATCAGACCAATCTCCAGTTCAACAACAACAAGTACTATCTG…
PARP1	2104@G06	142	PARP1	3042	poly (ADP-ribose) polymerase 1	ATGGCGGAGTCTTCGGATAAGCTCTATCGAGTCGAGTACGCCAAGAGCGGGCGCGCCTCTTGCAAGAAATGCAGCGAGAGCATCCCCAAGGACTCGCTCCGGATGGCCATCATGGTGCAGTCGCCCATGTTTGATGGAAAAGTCCCACACTGGTACCACTTCTCCTGCTTCTGGAAGGTGGGCCACTCCATCCGGCACCCTGACGTTGAGGTGGATGGGTTCTCTGAGCTTCGGTGGGATGATCAGCAGAAAGTCAAGAAGACAGCGGAAGCTGGAGGAGTGACAGGCAAAGGCCAGGATGGAATTGGTAGCAAGGCAGAGAAGACTCTGGGTGACTTTGCAGCAGAGTATGCCAAGTCCAACAGAAGTACGTGCAAGGGGTGTATGGAGAAGATAGAA…
PAPD7	81098@F03	11044	PAPD7	1629	PAP associated domain containing 7	ATGTCCCCTTGTCCTGAAGAAGCAGCTATGAGAAGAGAGGTGGTGAAACGGATCGAAACTGTGGTGAAAGACCTTTGGCCGACGGCTGATGTACAGATATTTGGCAGCTTTAGTACAGGTCTTTATCTTCCAACTAGCGACATAGACCTGGTGGTCTTCGGGAAATGGGAGCGTCCTCCTTTACAGCTGCTGGAGCAAGCCCTGCGGAAGCACAACGTGGCTGAGCCGTGTTCCATCAAAGTCCTTGACAAGGCTACGGTACCAATAATAAAGCTCACAGATCAGGAGACTGAAGTGAAAGTTGACATCAGCTTTAACATGGAGACGGGCGTCCGGGCAGCGGAGTTCATCAAGAATTACATGAAGAAATATTCATTGCTGCCTTACTTGATTTTAGTA…
PAPD7	81098@F12	11044	PAPD7	1629	PAP associated domain containing 7	ATGTCCCCTTGTCCTGAAGAAGCAGCTATGAGAAGAGAGGTGGTGAAACGGATCGAAACTGTGGTGAAAGACCTTTGGCCGACGGCTGATGTACAGATATTTGGCAGCTTTAGTACAGGTCTTTATCTTCCAACTAGCGACATAGACCTGGTGGTCTTCGGGAAATGGGAGCGTCCTCCTTTACAGCTGCTGGAGCAAGCCCTGCGGAAGCACAACGTGGCTGAGCCGTGTTCCATCAAAGTCCTTGACAAGGCTACGGTACCAATAATAAAGCTCACAGATCAGGAGACTGAAGTGAAAGTTGACATCAGCTTTAACATGGAGACGGGCGTCCGGGCAGCGGAGTTCATCAAGAATTACATGAAGAAATATTCATTGCTGCCTTACTTGATTTTAGTA…
PAN3	81128@F09	255967	PAN3	1662	PAN3 poly(A) specific ribonuclease subunit homolog (S. cerevisiae)	ATGTCGTTGTCTGCTGGGTCTTCCCCTCTTCATTCCCCCAAGATTACTCCACATACTTCTCCTGCTCCCAGAAGAAGAAGTCACACTCCAAATCCAGCAAGTTACATGGTGCCTTCTAGTGCCTCTACATCTGTTAATAATCCTGTTTCTCAGACTCCGTCTTCTGGTCAGGTGATCCAAAAGGAAACTGTTGGTGGGACGACTTACTTCTATACAGACACAACTCCAGCACCTTTGACTGGAATGGTGTTTCCAAACTATCATATTTATCCTCCAACTGCACCTCACGTTGCTTATATGCAACCGAAAGCAAACGCACCTTCCTTCTTCATGGCTGATGAACTCCGACAGGAGCTGATCAACAGACATTTAATAACAATGGCTCAAATTGATCAAGCA…
PALB2	2102@H07	79728	PALB2	3558	partner and localizer of BRCA2	ATGGACGAGCCTCCCGGGAAGCCCCTCAGCTGTGAGGAGAAGGAAAAGTTAAAGGAGAAATTAGCATTCTTGAAAAGGGAATACAGCAAGACACTAGCCCGCCTTCAGCGTGCCCAAAGAGCTGAAAAGATTAAGCATTCTATTAAGAAAACAGTAGAAGAACAAGATTGTTTGTCTCAGCAGGATCTCTCACCGCAGCTAAAACACTCAGAACCTAAAAATAAAATATGTGTTTATGACAAGTTACACATCAAAACCCATCTTGATGAAGAAACTGGAGAAAAGACATCTATCACACTTGATGTTGGGCCTGAGTCCTTTAACCCTGGAGATGGCCCAGGAGGATTACCTATACAAAGAACAGATGACACCCAAGAACATTTTCCCCACAGGGTCAGT…
OGG1	81064@G01	4968	OGG1	1038	8-oxoguanine DNA glycosylase	ATGCCTGCCCGCGCGCTTCTGCCCAGGCGCATGGGGCATCGTACTCTAGCCTCCACTCCTGCCCTGTGGGCCTCCATCCCGTGCCCTCGCTCTGAGCTGCGCCTGGACCTGGTTCTGCCTTCTGGACAATCTTTCCGGTGGAGGGAGCAAAGTCCTGCACACTGGAGTGGTGTACTAGCGGATCAAGTATGGACACTGACTCAGACTGAGGAGCAGCTCCACTGCACTGTGTACCGAGGAGACAAGAGCCAGGCTAGCAGGCCCACACCAGACGAGCTGGAGGCCGTGCGCAAGTACTTCCAGCTAGATGTTACCCTGGCTCAACTGTATCACCACTGGGGTTCCGTGGACTCCCACTTCCAAGAGGTGGCTCAGAAATTCCAAGGTGTGCGACTGCTG…
OBFC2B	81103@A01	79035	OBFC2B	636	oligonucleotide/oligosaccharide-binding fold containing 2B	ATGACGACGGAGACCTTTGTGAAGGATATCAAGCCTGGGCTCAAGAATCTGAACCTTATCTTCATTGTGCTGGAGACAGGCCGAGTGACCAAGACAAAGGACGGGCATGAGGTTCGGACCTGCAAAGTGGCGGACAAAACAGGCAGCATCAATATCTCTGTCTGGGACGATGTTGGCAATCTGATCCAGCCTGGGGACATTATCCGGCTCACCAAAGGGTACGCTTCAGTTTTCAAAGGTTGTCTGACACTATATACTGGCCGTGGGGGTGATCTGCAGAAGATTGGAGAATTCTGTATGGTTTATTCTGAGGTTCCTAACTTCAGTGAGCCAAACCCAGAGTACAGCACCCAGCAGGCACCCAACAAGGCGGTGCAGAACGACAGCAACCCTTCAGCT…
NGLY1	81090@C03	55768	NGLY1	1965	N-glycanase 1	ATGGCGGCGGCGGCATTGGGCAGCTCCTCAGGCTCGGCGTCCCCGGCCGTGGCTGAGCTCTGCCAGAACACCCCGGAGACCTTTTTGGAGGCCTCCAAGCTGCTGCTCACCTATGCTGACAACATCCTCAGAAACCCTAATGATGAAAAATATAGATCCATCCGGATTGGAAACACAGCCTTTTCTACTAGACTCTTGCCTGTCAGAGGAGCTGTTGAATGTTTATTTGAAATGGGCTTTGAAGAGGGAGAAACACATCTCATCTTTCCTAAAAAAGCTTCAGTGGAGCAGCTGCAAAAAATTCGTGACCTGATTGCCATAGAGAGAAGTAGCAGACTGGATGGCTCAAATAAGAGCCACAAAGTAAAGTCATCTCAGCAACCTGCAGCCAGTACCCAG…
MSH5	81018@F12	4439	MSH5	2508	mutS homolog 5 (E. coli)	ATGGCCTCCTTAGGAGCGAACCCAAGGAGGACACCGCAGGGACCGAGACCTGGGGCGGCCTCCTCCGGCTTCCCCAGCCCGGCCCCAGTGCCGGGCCCCAGGGAGGCCGAGGAGGAGGAAGTCGAGGAGGAGGAGGAGCTGGCCGAGATCCATCTGTGTGTGCTGTGGAATTCAGGATACTTGGGCATTGCCTACTATGATACTAGTGACTCCACTATCCACTTCATGCCAGATGCCCCAGACCACGAGAGCCTCAAGCTTCTCCAGAGAGTTCTGGATGAGATCAATCCCCAGTCTGTTGTTACGAGTGCCAAACAGGATGAGAATATGACTCGATTTCTGGGAAAGCTTGCCTCCCAGGAGCACAGAGAGCCTAAAAGACCTGAAATCATATTTTTG…
MSH5	81112@C02	4439	MSH5	2469	mutS homolog 5 (E. coli)	ATGGCCTCCTTAGGAGCGAACCCAAGGAGGACACCGCAGGGACCGAGACCTGGGGCGGCCTCCTCCGGCTTCCCCAGCCCGGCCCCAGTGCCGGGCCCCAGGGAGGCCGAGGAGGAGGAAGTCGAGGAGGAGGAGGAGCTGGCCGAGATCCATCTGTGTGTGCTGTGGAATTCAGGATACTTGGGCATTGCCTACTATGATACTAGTGACTCCACTATCCACTTCATGCCAGATGCCCCAGACCACGAGAGCCTCAAGCTTCTCCAGAGAGTTCTGGATGAGATCAATCCCCAGTCTGTTGTTACGAGTGCCAAACAGGATGAGAATATGACTCGATTTCTGGGAAAGCTTGCCTCCCAGGAGCACAGAGAGCCTAAAAGACCTGAAATCATATTTTTG…
MSH4	81019@D03	4438	MSH4	2811	mutS homolog 4 (E. coli)	ATGCTGAGGCCTGAGATCTCATCAACCTCGCCTTCTGCCCCGGCGGTTTCCCCGTCGTCGGGAGAAACCCGCTCACCTCAGGGTCCCCGCTACAATTTCGGACTCCAGGAGACTCCACAGAGCCGCCCTTCGGTCCAGGTGGTCTCTGCATCCACCTGTCCTGGCACGTCAGGAGCTGCGGGCGACCGGAGCAGCAGCAGCAGCAGCCTTCCCTGCCCCGCGCCAAACTCCCGGCCAGCTCAAGGTTCATACTTTGGAAACAAAAGAGCTTATGCAGAGAACACAGTTGCATCAAATTTTACTTTTGGTGCAAGCTCATCTTCTGCACGAGATACTAATTATCCTCAAACACTTAAAACTCCATTGTCTACTGGAAATCCTCAGAGATCAGGTTATAAG…
MSH2	81019@B02	4436	MSH2	2805	mutS homolog 2, colon cancer, nonpolyposis type 1 (E. coli)	ATGGCGGTGCAGCCGAAGGAGACGCTGCAGTTGGAGAGCGCGGCCGAGGTCGGCTTCGTGCGCTTCTTTCAGGGCATGCCGGAGAAGCCGACCACCACAGTGCGCCTTTTCGACCGGGGCGACTTCTATACGGCGCACGGCGAGGACGCGCTGCTGGCCGCCCGGGAGGTGTTCAAGACCCAGGGGGTGATCAAGTACATGGGGCCGGCAGGAGCAAAGAATCTGCAGAGTGTTGTGCTTAGTAAAATGAATTTTGAATCTTTTGTAAAAGATCTTCTTCTGGTTCGTCAGTATAGAGTTGAAGTTTATAAGAATAGAGCTGGAAATAAGGCATCCAAGGAGAATGATTGGTATTTGGCATATAAGGCTTCTCCTGGCAATCTCTCTCAGTTTGAAGAC…
MPG	81051@E10	4350	MPG	882	N-methylpurine-DNA glycosylase	ATGCCCGCGCGCAGCGGGGCCCAGTTTTGCCGACGGATGGGGCAAAAGAAGCAGCGACCAGCTAGAGCAGGGCAGCCACACAGCTCGTCCGACGCAGCCCAGGCACCTGCAGAGCAGCCACACAGCTCGTCCGATGCAGCCCAGGCACCTTGCCCCAGGGAGCGCTGCTTGGGACCGCCCACCACTCCGGGCCCATACCGCAGCATCTATTTCTCAAGCCCAAAGGGCCACCTTACCCGACTGGGGTTGGAGTTCTTCGACCAGCCGGCAGTCCCCCTGGCCCGGGCATTTCTGGGACAGGTCCTAGTCCGGCGACTTCCTAATGGCACAGAACTCCGAGGCCGCATCGTGGAGACCGAGGCATACCTGGGGCCAGAGGATGAAGCCGCCCACTCAAGG…
MORF4L1	81061@B10	10933	MORF4L1	972	mortality factor 4 like 1	ATGGCGCCGAAGCAGGACCCGAAGCCTAAATTCCAGGAGGGTGAGCGAGTGCTGTGCTTTCATGGGCCTCTTCTTTATGAAGCAAAGTGTGTAAAGGTTGCCATAAAGGACAAACAAGTGAAATACTTCATACATTACAGTGGTTGGAATAAAAATTGGGATGAATGGGTTCCGGAGAGCAGAGTACTCAAATACGTGGACACCAATTTGCAGAAACAGCGAGAACTTCAAAAAGCCAATCAGGAGCAGTATGCAGAGGGGAAGATGAGAGGGGCTGCCCCAGGAAAGAAGACATCTGGTCTGCAACAGAAAAATGTTGAAGTGAAAACGAAAAAGAACAAACAGAAAACACCTGGAAATGGAGATGGTGGCAGTACCAGTGAGACCCCTCAGCCTCCT…
MNAT1	81054@G05	4331	MNAT1	930	menage a trois homolog 1, cyclin H assembly factor (Xenopus laevis)	ATGGACGATCAGGGTTGCCCTCGGTGTAAGACCACCAAATATCGGAACCCCTCCTTGAAGCTGATGGTGAATGTGTGCGGACACACTCTCTGTGAAAGTTGTGTAGATTTACTGTTTGTGAGAGGAGCTGGAAACTGCCCTGAGTGTGGTACTCCACTCAGAAAGAGCAACTTCAGGGTACAACTCTTTGAAGATCCCACTGTTGACAAGGAGGTTGAGATCAGGAAAAAAGTGCTAAAGATATACAATAAAAGGGAAGAAGATTTTCCTAGTCTAAGAGAATACAATGATTTCTTGGAAGAAGTGGAAGAAATTGTTTTCAACTTGACCAACAATGTGGATTTGGACAACACCAAAAAGAAAATGGAGATATACCAAAAGGAAAACAAAGATGTTATT…
MMS22L	2119@H01	253714	MMS22L	3732	MMS22-like, DNA repair protein	ATGGAGAACTGTTCTGCTGCATCGACGTTCCTGACTGACAGCTTAGAGCTGGAGCTGGGGACGGAATGGTGCAAACCTCCTTACTTTTCTTGTGCTGTTGACAACAGAGGAGGAGGAAAACATTTTTCTGGAGAATCCTACCTCTGCAGCGGAGCCCTTAAGCGATTGATTTTGAATCTTGACCCTTTACCAACTAATTTTGAAGAAGATACCTTGGAAATATTTGGCATTCAGTGGGTTACTGAAACAGCATTAGTGAATTCATCTAGAGAACTCTTTCATTTATTCAGGCAACAACTGTACAACTTGGAAACCTTGTTACAGTCCAGTTGTGATTTTGGGAAGGTATCAACTCTACACTGCAAAGCAGACAATATTAGGCAGCAGTGTGTACTATTT…
MMS19	81051@G07	64210	MMS19	882	MMS19 nucleotide excision repair homolog (S. cerevisiae)	ATGCGGGAGCTTTTGGAACTGAGCTGCTGCCACAGCTGCCCCTTTTCTTCCACCGCTGCTGCCAAGTGCTTTGCAGGACTCCTCAACAAGCACCCTGCAGGGCAGCAGCTGGATGAATTCCTACAGCTAGCTGTGGACAAAGTGGAGGCTGGCCTGGGCTCTGGGCCCTGTCGTAGTCAGGCCTTCACTCTTCTTCTCTGGGTAACAAAGGCCCTAGTGCTCAGATACCATCCTCTCAGCTCCTGCCTTACAGCCCGGCTCATGGGCCTCCTGAGTGACCCAGAATTAGGTCCAGCAGCAGCTGATGGCTTCTCTCTGCTCATGTCTGACTGCACTGATGTGCTGACTCGTGCTGGCCATGCTGAAGTGCGGATCATGTTCCGCCAGCGGTTCTTCACA…
MLH3	81021@E01	27030	MLH3	4290	mutL homolog 3 (E. coli)	ATGATCAAGTGCTTGTCAGTTGAAGTACAAGCCAAATTGCGTTCTGGTTTGGCCATAAGCTCCTTGGGCCAATGTGTTGAGGAACTTGCCCTCAACAGTATTGATGCTGAAGCAAAATGTGTGGCTGTCAGGGTGAATATGGAAACCTTCCAAGTTCAAGTGATAGACAATGGATTTGGGATGGGGAGTGATGATGTAGAGAAAGTGGGAAATCGTTATTTCACCAGTAAATGCCACTCGGTACAGGACTTGGAGAATCCAAGGTTTTATGGTTTCCGAGGAGAGGCCTTGGCAAATATTGCTGACATGGCCAGTGCTGTGGAAATTTCGTCCAAGAAAAACAGGACAATGAAAACTTTTGTGAAACTGTTTCAGAGTGGAAAAGCCCTGAAAGCTTGT…
MLH1	81016@H08	4292	MLH1	2271	mutL homolog 1, colon cancer, nonpolyposis type 2 (E. coli)	ATGTCGTTCGTGGCAGGGGTTATTCGGCGGCTGGACGAGACAGTGGTGAACCGCATCGCGGCGGGGGAAGTTATCCAGCGGCCAGCTAATGCTATCAAAGAGATGATTGAGAACTGTTTAGATGCAAAATCCACAAGTATTCAAGTGATTGTTAAAGAGGGAGGCCTGAAGTTGATTCAGATCCAAGACAATGGCACCGGGATCAGGAAAGAAGATCTGGATATTGTATGTGAAAGGTTCACTACTAGTAAACTGCAGTCCTTTGAGGATTTAGCCAGTATTTCTACCTATGGCTTTCGAGGTGAGGCTTTGGCCAGCATAAGCCATGTGGCTCATGTTACTATTACAACGAAAACAGCTGATGGAAAGTGTGCATACAGAGCAAGTTACTCAGATGGA…
MCM9	81074@A03	254394	MCM9	1176	minichromosome maintenance complex component 9	ATGAATAGCGATCAAGTTACACTGGTTGGTCAAGTGTTTGAGTCATATGTTTCGGAATACCATAAGAATGATATTCTTCTAATCTTGAAGGAAAGGGATGAAGATGCTCATTACCCAGTTGTGGTTAATGCCATGACTCTGTTTGAGACCAACATGGAAATCGGGGAATATTTCAACATGTTCCCCAGTGAAGTGCTTACAATTTTTGATAGTGCACTGCGAAGGTCAGCCTTGACAATTCTCCAGTCCCTTTCTCAGCCTGAGGCTGTTTCCATGAAACAGAATCTTCATGCCAGGATATCAGGTTTGCCTGTCTGTCCTGAGCTGGTGAGGGAACACATACCTAAAACCAAGGATGTGGGACACTTTTTATCTGTCACTGGGACAGTGATTCGAACA…
MCM8	81138@G03	84515	MCM8	2523	minichromosome maintenance complex component 8	ATGAATGGAGAGTATAGAGGCAGAGGATTTGGACGAGGAAGATTTCAAAGCTGGAAAAGGGGAAGAGGTGGTGGGAACTTCTCAGGAAAATGGAGAGAAAGAGAACACAGACCTGATCTGAGTAAAACCACAGGAAAACGTACTTCTGAACAAACCCCACAGTTTTTGCTTTCAACAAAGACCCCACAGTCAATGCAGTCAACATTGGATCGATTCATACCATATAAAGGCTGGAAGCTTTATTTCTCTGAAGTTTACAGCGATAGCTCTCCTTTGATTGAGAAGATTCAAGCATTTGAAAAATTTTTCACAAGGCATATTGATTTGTATGACAAGGATGAAATAGAAAGAAAGGGAAGTATTTTGGTAGATTTTAAAGAACTGACAGAAGGTGGTGAA…
LRIG1	81131@B08	26018	LRIG1	3213	leucine-rich repeats and immunoglobulin-like domains 1	ATGGCGCGGCCGGTCCGGGGAGGGCTCGGGGCCCCGCGCCGCTCGCCTTGCCTTCTCCTTCTCTGGCTGGTTTTGGTTCGGCTGGAGCCGGTGACCGCCGCGGCCGGCCCGCGGGCGCCCTGCGCGGCCGCCTGCACTTGCGCTGGGGACTCGCTGGACTGCGGTGGGCGCGGGCTGGCTGCGTTGCCCGGGGACCTGCCCTCCTGGACGCGGAGCCTAAACCTGAGTTACAACAAATTCTCTGAGATTGACCCTGCTGGTTTTGAGGACTTGCCGAACCTACAGGAAGTGTACCTCAATAATAATGAGTTGACAGCGGTACCATCCCTGGGCGCTGCTTCATCACATGTCGTCTCTCTCTTTCTGCAGCACAACAAGATTCGCAGCGTGGAGGGGAGC…
LIG4	81019@B03	3981	LIG4	2736	ligase IV, DNA, ATP-dependent	ATGGCTGCCTCACAAACTTCACAAACTGTTGCATCTCACGTTCCTTTTGCAGATTTGTGTTCAACTTTAGAACGAATACAGAAAAGTAAAGGACGTGCAGAAAAAATCAGACACTTCAGGGAATTTTTAGATTCTTGGAGAAAATTTCATGATGCTCTTCATAAGAACCACAAAGATGTCACAGACTCTTTTTATCCAGCAATGAGACTAATTCTTCCTCAGCTAGAAAGAGAGAGAATGGCCTATGGAATTAAAGAAACTATGCTTGCTAAGCTTTATATTGAGTTGCTTAATTTACCTAGAGATGGAAAAGATGCCCTCAAACTTTTAAACTACAGAACACCCACTGGAACTCATGGAGATGCTGGAGACTTTGCAATGATTGCATATTTTGTGTTG…
LIG3	81052@B08	3980	LIG3	900	ligase III, DNA, ATP-dependent	ATGTCTTTGGCTTTCAAGATCTTCTTTCCACAAACCCTCCGTGCACTCAGCCGAAAAGAACTGTGCCTATTCCGAAAACATCACTGGCGTGATGTAAGACAATTCAGCCAGTGGTCAGAAACAGATCTGCTTCATGGACATCCCCTCTTCCTGAGAAGAAAGCCTGTTCTATCATTCCAGGGAAGCCATCTAAGATCACGTGCCACCTACCTTGTTTTCTTGCCAGGGTTGCATGTGGGACTCTGCAGTGGCCCCTGTGAGATGGCTGAGCAACGGTTCTGTGTGGACTATGCCAAGCGTGGCACAGCTGGCTGCAAAAAATGCAAGGAAAAGATTGTGAAGGGCGTATGCCGAATTGGCAAAGTGGTGCCCAATCCCTTCTCAGAGTCTGGGGGTGAT…
LIG3	81020@E07	3980	LIG3	3030	ligase III, DNA, ATP-dependent	ATGTCTTTGGCTTTCAAGATCTTCTTTCCACAAACCCTCCGTGCACTCAGCCGAAAAGAACTGTGCCTATTCCGAAAACATCACTGGCGTGATGTAAGACAATTCAGCCAGTGGTCAGAAACAGATCTGCTTCATGGACATCCCCTCTTCCTGAGAAGAAAGCCTGTTCTATCATTCCAGGGAAGCCATCTAAGATCACGTGCCACCTACCTTGTTTTCTTGCCAGGGTTGCATGTGGGACTCTGCAGTGGCCCCTGTGAGATGGCTGAGCAACGGTTCTGTGTGGACTATGCCAAGCGTGGCACAGCTGGCTGCAAAAAATGCAAGGAAAAGATTGTGAAGGGCGTATGCCGAATTGGCAAAGTGGTGCCCAATCCCTTCTCAGAGTCTGGGGGTGAT…
LIG1	81131@H03	3978	LIG1	2760	ligase I, DNA, ATP-dependent	ATGCAGCGAAGTATCATGTCATTTTTCCACCCCAAGAAAGAGGGTAAAGCAAAGAAGCCTGAGAAGGAGGCATCCAATAGCAGCAGAGAGACGGAGCCCCCTCCAAAGGCGGCACTGAAGGAGTGGAATGGAGTGGTGTCCGAGAGTGACTCTCCGGTGAAGAGGCCAGGGAGGAAGGCGGCCCGGGTCCTGGGCAGCGAAGGGGAAGAGGAGGATGAAGCCCTTAGCCCTGCTAAAGGCCAGAAGCCTGCCCTGGACTGCTCACAGGTCTCCCCGCCCCGTCCTGCCACATCTCCTGAGAACAATGCTTCCCTCTCTGACACCTCTCCCATGGACAGTTCCCCATCAGGGATTCCGAAGCGTCGCACAGCTCGGAAGCAGCTCCCGAAACGGACCATT…
KIAA1530	81068@A08	57654	KIAA1530	783	KIAA1530	ATGGACGAGGAGGTGTCGGACCCCACCTCTGCGGCTGCTCAGCTGCGGCAGCTCCGGGACCACTTGCCTCCACCCTCATCTGCCAGCCCCTCCAGAGCGTTGCCAGAGCCACAGGAGGCCCAGAAGCTGGCAGCAGAGCGGGCCCGGGCGCCTGTGGTGCCCTACGGCGTGGACCTGCACTACTGGGGCCAGGAGCTCCCCACAGCCGGGAAGATTGTCAAGTCTGACTCCCAGCACCGCTTCTGGAAGCCCAGCGAGGTGGAGGAGGAAGTGGTCAATGCCGACATCTCCGAGATGCTCCGGAGCCGCCACATCACTTTTGCCGGGAAGTTTGAGCCTGTGCAGCACTGGTGCCGTGCCCCGAGGCCAGACGGCCGGCTCTGTGAGCGCCAAGACCGG…
FEN1	81073@E05	2237	FEN1	1143	flap structure-specific endonuclease 1	ATGGGAATTCAAGGCCTGGCCAAACTAATTGCTGATGTGGCCCCCAGTGCCATCCGGGAGAATGACATCAAGAGCTACTTTGGCCGTAAGGTGGCCATTGATGCCTCTATGAGCATTTATCAGTTCCTGATTGCTGTTCGCCAGGGTGGGGATGTGCTGCAGAATGAGGAGGGTGAGACCACCAGCCACCTGATGGGCATGTTCTACCGCACCATTCGCATGATGGAGAACGGCATCAAGCCCGTGTATGTCTTTGATGGCAAGCCGCCACAGCTCAAGTCAGGCGAGCTGGCCAAACGCAGTGAGCGGCGGGCTGAGGCAGAGAAGCAGCTGCAGCAGGCTCAGGCTGCTGGGGCCGAGCAGGAGGTGGAAAAATTCACTAAGCGGCTGGTGAAGGTC…
ISG20	81027@H08	3669	ISG20	546	interferon stimulated exonuclease gene 20kDa	ATGGCTGGGAGCCGTGAGGTGGTGGCCATGGACTGCGAGATGGTGGGGCTGGGGCCCCACCGGGAGAGTGGCCTGGCTCGTTGCAGCCTCGTGAACGTCCACGGTGCTGTGCTGTACGACAAGTTCATCCGGCCTGAGGGAGAGATCACCGATTACAGAACCCGGGTCAGCGGGGTCACCCCTCAGCACATGGTGGGGGCCACACCATTTGCCGTGGCCAGGCTAGAGATCCTGCAGCTCCTGAAAGGCAAGCTGGTGGTGGGTCATGACCTGAAGCACGACTTCCAGGCACTGAAAGAGGACATGAGCGGCTACACAATCTACGACACGTCCACTGACAGGCTGTTGTGGCGTGAGGCCAAGCTGGACCACTGCAGGCGTGTCTCCCTGCGGGTGCTG…
INO80	81132@A01	54617	INO80	4671	INO80 homolog (S. cerevisiae)	ATGGCCTCGGAGTTGGGTGCCAGGGATGATGGAGGCTGCACTGAGCTGGCAAAGCCCCTCTATCTTCAGTACTTGGAGAGGGCCCTCCGGTTGGACCATTTTCTGCGACAAACGTCAGCTATCTTCAATAGGAATATTTCTAGTGATGACAGTGAAGATGGACTGGATGACAGTAATCCATTATTGCCCCAGTCTGGGGATCCCTTAATACAAGTTAAGGAAGAACCTCCAAATTCATTGCTTGGTGAAACTTCTGGAGCAGGCAGTTCTGGAATGTTAAACACATATTCTCTGAATGGAGTTCTACAGTCAGAATCAAAATGTGATAAGGGGAATTTATATAATTTCTCTAAGCTGAAGAAAAGCAGAAAGTGGCTAAAGAGCATTCTGCTAAGTGAT…
HUS1B	81117@C11	135458	HUS1B	837	HUS1 checkpoint homolog b (S. pombe)	ATGAAGTTTCGCGCCAAGATCACCGGCAAAGGCTGTCTAGAGCTGTTCATTCACGTCAGCGGCACCGTCGCGAGGCTAGCGAAGGTCTGCGTGCTCCGCGTGCGCCCTGACAGCCTGTGCTTCGGCCCCGCGGGTTCCGGCGGCCTCCACGAGGCCAGGCTGTGGTGCGAGGTGCGGCAGGGGGCCTTCCAGCAGTTTCGCATGGAAGGTGTCTCGGAAGATCTCGATGAGATCCACCTGGAGCTGACGGCGGAGCACCTGTCCCGGGCGGCGAGAAGCGCAGCGGGCGCGTCCTCCCTGAAGCTGCAGCTGACCCACAAGCGCCGCCCCTCCCTCACGGTGGCGGTGGAGCTGGTCTCGTCCCTGGGCCGCGCTCGCAGCGTGGTGCACGATCTGCCC…
HUS1	81049@H11	3364	HUS1	843	HUS1 checkpoint homolog (S. pombe)	ATGAAGTTTCGGGCCAAGATCGTGGACGGGGCCTGTCTGAACCACTTCACACGAATCAGTAACATGATAGCCAAGCTTGCCAAAACCTGCACCCTCCGCATCAGCCCTGATAAGCTTAACTTCATCCTTTGTGACAAGCTGGCTAATGGAGGAGTGAGCATGTGGTGTGAGCTGGAACAGGAGAACTTCTTCAACGAATTTCAAATGGAGGGTGTCTCTGCAGAAAACAATGAGATTTATTTAGAGCTAACATCGGAAAACTTATCTCGAGCCTTGAAGACTGCCCAGAATGCCAGGGCTTTGAAAATCAAACTGACTAATAAACACTTTCCCTGCCTCACGGTCTCCGTGGAGCTGTTATCTATGTCAAGCAGTAGCCGCATTGTGACCCATGACATC…
HMGN1	81005@A11	3150	HMGN1	303	high mobility group nucleosome binding domain 1	ATGCCCAAGAGGAAGGTCAGCTCCGCCGAAGGCGCCGCCAAGGAAGAGCCCAAGAGGAGATCGGCGCGGTTGTCAGCTAAACCTCCTGCAAAAGTGGAAGCGAAGCCGAAAAAGGCAGCAGCGAAGGATAAATCTTCAGACAAAAAAGTGCAAACAAAAGGGAAAAGGGGAGCAAAGGGAAAACAGGCCGAAGTGGCTAACCAAGAAACTAAAGAAGACTTACCTGCGGAAAACGGGGAAACGAAGACTGAGGAGAGTCCAGCCTCTGATGAAGCAGGAGAGAAAGAAGCCAAGTCTGATTAA
HMGB2	81030@D01	3148	HMGB2	630	high mobility group box 2	ATGGGTAAAGGAGACCCCAACAAGCCGCGGGGCAAAATGTCCTCGTACGCCTTCTTCGTGCAGACCTGCCGGGAAGAGCACAAGAAGAAACACCCGGACTCTTCCGTCAATTTCGCGGAATTCTCCAAGAAGTGTTCGGAGAGATGGAAGACCATGTCTGCAAAGGAGAAGTCGAAGTTTGAAGATATGGCAAAAAGTGACAAAGCTCGCTATGACAGGGAGATGAAAAATTACGTTCCTCCCAAAGGTGATAAGAAGGGGAAGAAAAAGGACCCCAATGCTCCTAAAAGGCCACCATCTGCCTTCTTCCTGTTTTGCTCTGAACATCGCCCAAAGATCAAAAGTGAACACCCTGGCCTATCCATTGGGGATACTGCAAAGAAATTGGGTGAAATGTGG…
HMGB1	81031@B05	3146	HMGB1	648	high mobility group box 1	ATGGGCAAAGGAGATCCTAAGAAGCCGAGAGGCAAAATGTCATCATATGCATTTTTTGTGCAAACTTGTCGGGAGGAGCATAAGAAGAAGCACCCAGATGCTTCAGTCAACTTCTCAGAGTTTTCTAAGAAGTGCTCAGAGAGGTGGAAGACCATGTCTGCTAAAGAGAAAGGAAAATTTGAAGATATGGCAAAGGCGGACAAGGCCCGTTATGAAAGAGAAATGAAAACCTATATCCCTCCCAAAGGGGAGACAAAAAAGAAGTTCAAGGATCCCAATGCACCCAAGAGGCCTCCTTCGGCCTTCTTCCTCTTCTGCTCTGAGTATCGCCCAAAAATCAAAGGAGAACATCCTGGCCTGTCCATTGGTGATGTTGCGAAGAAACTGGGAGAGATGTGG…
HMGA2	2120@D01	8091	HMGA2	330	high mobility group AT-hook 2	ATGAGCGCACGCGGTGAGGGCGCGGGGCAGCCGTCCACTTCAGCCCAGGGACAACCTGCCGCCCCAGCGCCTCAGAAGAGAGGACGCGGCCGCCCCAGGAAGCAGCAGCAAGAACCAACCGGTGAGCCCTCTCCTAAGAGACCCAGGGGAAGACCCAAAGGCAGCAAAAACAAGAGTCCCTCTAAAGCAGCTCAAAAGAAAGCAGAAGCCACTGGAGAAAAACGGCCAAGAGGCAGACCTAGGAAATGGCCACAACAAGTTGTTCAGAAGAAGCCTGCTCAGGAGGAAACTGAAGAGACATCCTCACAAGAGTCTGCCGAAGAGGACTAG
HMGA1	81006@A10	3159	HMGA1	324	high mobility group AT-hook 1	ATGAGTGAGTCGAGCTCGAAGTCCAGCCAGCCCTTGGCCTCCAAGCAGGAAAAGGACGGCACTGAGAAGCGGGGCCGGGGCAGGCCGCGCAAGCAGCCTCCGGTGAGTCCCGGGACAGCGCTGGTAGGGAGTCAGAAGGAGCCCAGCGAAGTGCCAACACCTAAGAGACCTCGGGGCCGACCAAAGGGAAGCAAAAACAAGGGTGCTGCCAAGACCCGGAAAACCACCACAACTCCAGGAAGGAAACCAAGGGGCAGACCCAAAAAACTGGAGAAGGAGGAAGAGGAGGGCATCTCGCAGGAGTCCTCGGAGGAGGAGCAGTGA
HMGA1	81005@E04	3159	HMGA1	291	high mobility group AT-hook 1	ATGAGTGAGTCGAGCTCGAAGTCCAGCCAGCCCTTGGCCTCCAAGCAGGAAAAGGACGGCACTGAGAAGCGGGGCCGGGGCAGGCCGCGCAAGCAGCCTCCGAAGGAGCCCAGCGAAGTGCCAACACCTAAGAGACCTCGGGGCCGACCAAAGGGAAGCAAAAACAAGGGTGCTGCCAAGACCCGGAAAACCACCACAACTCCAGGAAGGAAACCAAGGGGCAGACCCAAAAAACTGGAGAAGGAGGAAGAGGAGGGCATCTCGCAGGAGTCCTCGGAGGAGGAGCAGTGA
HELQ	81048@B05	113510	HELQ	819	helicase, POLQ-like	ATGGATGAATGTGGTTCCCGCATCCGCCGGCGGGTGTCTCTCCCCAAAAGGAACCGTCCAAGCTTGGGGTGTATTTTTGGCGCTCCCACCGCGGCCGAGCTCGAGCCCGGAGATGAGGGGAAAGAGGAGGAGGAAATGGTGGCTGAGAACAGGAGGCGGAAAACCGCGGGCGTACTGCCGGTTGAGGTACAGCCCCTTCTACTCTCAGATTCCCCGGAATGTCTCGTCCTTGGAGGTGGTGATACAAACCCGGACCTCCTACGTCACATGCCCACTGACAGAGGGGTGGGAGACCAGCCTAATGACAGTGAAGTGGACATGTTTGGTGACTATGATAGCTTTACTGAAAACTCCTTTATAGCTCAAGTTGACGACCTGGAACAAAAATATATGCAACTC…
H2AFX	81011@B01	3014	H2AFX	432	H2A histone family, member X	ATGTCGGGCCGCGGCAAGACTGGCGGCAAGGCCCGCGCCAAGGCCAAGTCGCGCTCGTCGCGCGCCGGCCTCCAGTTCCCAGTGGGCCGTGTACACCGGCTGCTGCGGAAGGGCCACTACGCCGAGCGCGTTGGCGCCGGCGCGCCAGTGTACCTGGCGGCAGTGCTGGAGTACCTCACCGCTGAGATCCTGGAGCTGGCGGGCAATGCGGCCCGCGACAACAAGAAGACGCGAATCATCCCCCGCCACCTGCAGCTGGCCATCCGCAACGACGAGGAGCTCAACAAGCTGCTGGGCGGCGTGACGATCGCCCAGGGAGGCGTCCTGCCCAACATCCAGGCCGTGCTGCTGCCCAAGAAGACCAGCGCCACCGTGGGGCCGAAGGCGCCCTCGGGCGGC…
GTF2H5	81101@G09	404672	GTF2H5	216	general transcription factor IIH, polypeptide 5	ATGGTCAACGTCTTGAAAGGAGTGCTTATAGAATGTGATCCTGCCATGAAGCAGTTTCTGCTGTACTTGGATGAGTCCAATGCCCTGGGGAAGAAGTTCATCATTCAAGACATTGATGACACTCACGTCTTTGTAATAGCAGAATTGGTTAATGTCCTCCAGGAGCGAGTGGGTGAATTAATGGACCAAAATGCTTTTTCCCTTACCCAGAAATGA
GTF2H4	2101@B06	2968	GTF2H4	1386	general transcription factor IIH, polypeptide 4, 52kDa	ATGGAGAGCACCCCTTCAAGGGGACTGAACCGAGTACACCTACAATGCAGGAATCTGCAGGAATTCTTAGGGGGCCTGAGCCCTGGGGTATTGGACCGATTGTATGGGCACCCTGCCACATGTCTGGCTGTCTTCAGGGAGCTCCCATCCTTGGCTAAGAACTGGGTGATGCGGATGCTCTTTCTGGAGCAGCCTTTGCCACAGGCTGCTGTAGCTCTGTGGGTAAAGAAGGAATTCAGCAAGGCTCAGGAGGAAAGTACAGGGCTGCTGAGCGGCCTCCGGATCTGGCACACACAGCTGCTCCCAGGCGGGCTCCAGGGCCTCATCCTCAACCCCATTTTCCGCCAGAACCTCCGCATTGCCCTTCTGGGTGGGGGGAAGGCCTGGTCTGATGACACA…
GTF2H3	81068@D04	2967	GTF2H3	927	general transcription factor IIH, polypeptide 3, 34kDa	ATGGTTTCAGACGAAGATGAATTGAATCTTCTGGTTATTGTAGTTGATGCCAACCCAATTTGGTGGGGAAAGCAAGCATTAAAGGAATCTCAGTTCACTTTATCCAAATGCATAGATGCCGTGATGGTGCTGGGAAATTCGCATTTATTCATGAATCGTTCCAACAAACTTGCTGTGATAGCAAGTCACATTCAAGAAAGCCGATTCTTATATCCTGGAAAGAATGGCAGACTTGGAGACTTCTTCGGAGACCCTGGCAACCCTCCTGAATTTAATCCCTCTGGGAGTAAAGATGGAAAATACGAACTTTTAACCTCAGCAAATGAAGTTATTGTTGAAGAGATTAAAGATCTAATGACCAAAAGTGACATAAAGGGTCAACATACAGAAACTTTGCTG…
GTF2H2D	81075@A05	730394	GTF2H2D	1188	general transcription factor IIH, polypeptide 2D	ATGGATGAAGAACCTGAAAGAACTAAGCGATGGGAAGGAGGCTATGAAAGAACATGGGAGATTCTTAAAGAAGATGAATCTGGATCACTTAAAGCTACAATAGAAGACATTCTATTCAAGGCAAAGAGAAAAAGAGTATTTGAGCACCATGGACAAGTTCGACTTGGAATGATGCGCCACCTTTATGTGGTAGTAGATGGATCAAGAACAATGGAAGACCAAGATTTAAAGCCTAATAGACTGACGTGTACTTTAAAGTTGTTGGAATACTTTGTAGAGGAATATTTTGATCAAAATCCTATTAGTCAGATTGGAATAATTGTAACTAAGAGTAAAAGAGCTGAAAAATTGACTGAACTTTCAGGAAACCCAAGAAAACATATAACGTCTTTGAAGGAA…
GTF2H1	2102@H01	2965	GTF2H1	1644	general transcription factor IIH, polypeptide 1, 62kDa	ATGGCAACCTCATCTGAAGAAGTTTTGCTGATTGTAAAGAAAGTGCGTCAAAAGAAGCAGGATGGAGCTCTGTACCTCATGGCAGAAAGAATTGCTTGGGCACCTGAAGGCAAAGATAGATTTACAATCAGCCATATGTATGCAGATATTAAATGCCAGAAAATTAGTCCAGAAGGAAAAGCTAAAATTCAGCTTCAGCTGGTCCTACATGCAGGGGACACAACTAACTTCCATTTTTCCAATGAAAGCACAGCAGTGAAAGAGCGAGATGCAGTAAAAGACCTTCTTCAGCAGCTGCTGCCCAAATTCAAGAGGAAAGCAAATAAAGAACTGGAAGAGAAGAACAGAATGCTGCAAGAAGATCCTGTTTTGTTTCAGCTTTATAAAGACCTTGTTGTG…
GEN1	81019@D11	348654	GEN1	2727	Gen endonuclease homolog 1 (Drosophila)	ATGGGAGTGAATGACTTGTGGCAAATTTTGGAGCCTGTTAAGCAACACATCCCCTTGCGTAATCTTGGTGGGAAAACCATTGCAGTTGATCTGAGTCTCTGGGTGTGTGAGGCACAGACAGTCAAAAAAATGATGGGCAGCGTCATGAAGCCCCACCTCAGGAACTTATTTTTTCGTATCTCATATTTAACACAAATGGATGTAAAACTGGTATTTGTTATGGAAGGGGAACCACCAAAGCTGAAAGCTGATGTCATAAGCAAGAGGAATCAGACTCGGTATGGGTCTTCTGGAAAATCGTGGTCTCAGAAAACAGGGAGATCACATTTTAAATCAGTCTTAAGAGAGTGCCTCCATATGCTCGAATGCTTAGGAATCCCCTGGGTTCAGGCTGCTGGG…
FANCG	81107@G04	2189	FANCG	1869	Fanconi anemia, complementation group G	ATGTCCCGCCAGACCACCTCTGTGGGCTCCAGCTGCCTGGACCTGTGGAGGGAAAAGAATGACCGGCTCGTTCGACAGGCCAAGGTGGCTCAGAACTCCGGTCTGACTCTGAGGCGACAGCAGTTGGCTCAGGATGCACTGGAAGGGCTCAGAGGGCTCCTCCATAGTCTGCAAGGGCTCCCTGCAGCTGTTCCTGTTCTTCCCTTGGAGCTGACTGTCACCTGCAACTTCATTATCCTGAGGGCAAGCTTGGCCCAGGGTTTCACAGAGGATCAGGCCCAGGATATCCAGCGGAGCCTAGAGAGAGTGCTGGAGACACAGGAGCAGCAGGGGCCCAGGTTGGAACAGGGGCTCAGGGAGCTGTGGGACTCTGTCCTTCGTGCTTCCTGCCTTCTGCCG…
FANCE	81126@F04	2178	FANCE	1611	Fanconi anemia, complementation group E	ATGGCGACACCGGACGCGGGGCTCCCTGGGGCTGAGGGCGTGGAGCCGGCGCCCTGGGCGCAGCTGGAGGCCCCCGCCCGCCTCCTGCTGCAGGCGCTGCAGGCGGGGCCTGAGGGGGCGCGGCGCGGCCTGGGGGTGCTCCGGGCGCTGGGCAGCCGCGGCTGGGAGCCCTTCGACTGGGGTCGCTTGCTCGAGGCCCTGTGCCGGGAGGAGCCGGTCGTGCAGGGGCCTGACGGCCGTCTGGAGCTGAAACCACTGTTGCTGCGATTGCCCCGGATATGCCAGAGGAACCTGATGTCCCTGCTGATGGCCGTTCGGCCATCGCTGCCGGAAAGTGGGCTCCTCTCTGTGCTGCAGATTGCCCAGCAGGACCTAGCCCCTGACCCCGATGCCTGGCTC…
FANCC	81099@C06	2176	FANCC	1677	Fanconi anemia, complementation group C	ATGGCTCAAGATTCAGTAGATCTTTCTTGTGATTATCAGTTTTGGATGCAGAAGCTTTCTGTATGGGATCAGGCTTCCACTTTGGAAACCCAGCAAGACACCTGTCTTCACGTGGCTCAGTTCCAGGAGTTCCTAAGGAAGATGTATGAAGCCTTGAAAGAGATGGATTCTAATACAGTCATTGAAAGATTCCCCACAATTGGTCAACTGTTGGCAAAAGCTTGTTGGAATCCTTTTATTTTAGCATATGATGAAAGCCAAAAAATTCTAATATGGTGCTTATGTTGTCTAATTAACAAAGAACCACAGAATTCTGGACAATCAAAACTTAACTCCTGGATACAGGGTGTATTATCTCATATACTTTCAGCACTCAGATTTGATAAAGAAGTTGCTCTT…
FANCB	81131@G01	2187	FANCB	2580	Fanconi anemia, complementation group B	ATGACTAGCAAACAAGCAATGTCATCTAACGAACAAGAAAGGCTCTTGTGTTATAATGGGGAAGTCCTTGTTTTCCAGTTGTCTAAAGGAAATTTTGCAGATAAAGAGCCTACAAAAACACCCATATTACATGTCAGAAGAATGGTATTTGACAGAGGAACAAAAGTATTTGTTCAGAAGTCCACTGGATTTTTTACCATAAAGGAAGAAAACTCTCATTTAAAAATCATGTGTTGCAACTGTGTGTCAGATTTCAGAACTGGAATTAACCTCCCTTACATTGTGATAGAAAAAAATAAAAAGAATAATGTTTTTGAATATTTTTTACTAATCCTTCACAGTACTAATAAATTTGAAATGCGTTTGAGTTTTAAACTAGGCTATGAGATGAAGGATGGC…
FAN1	81104@H01	22909	FAN1	1602	FANCD2/FANCI-associated nuclease 1	ATGTCAGAAGGGAAACCTCCTGACAAAAAAAAAAGGCCTCGTAGAAGCTTATCAATCAGCAAGAATAAGAAAAAAGCATCTAATTCTATTATTTCGTGTTTTAACAATGCACCACCTGCTAAACTTGCCTGCCCCGTTTGCAGTAAAATGGTGCCTAGATATGACTTAAACCGGCACCTTGATGAAATGTGTGCTAACAATGACTTCGTTCAAGTGGATCCAGGGCAGGTTGGCTTAATAAATTCAAATGTGTCTATGGTAGATTTAACCAGTGTTACCTTAGAAGATGTAACACCTAAGAAGTCACCACCACCAAAGACAAATTTAACCCCTGGCCAAAGTGATTCAGCAAAAAGGGAAGTAAAGCAGAAGATCAGTCCCTACTTTAAAAGTAATGAT…
FAM175A	81059@G03	84142	FAM175A	903	family with sequence similarity 175, member A	ATGACGTTTAGAGAGAGGCTGCTTCACAAAAACTTGCAGGAGCATTTTTCAAACCAAGACCTTGTTTTTCTGCTATTAACACCAAGTATAATAACAGAAAGCTGCTCTACTCATCGACTGGAACATTCCTTATATAAACCTCAAAAAGGACTTTTTCACAGGGTACCTTTAGTGGTTGCCAATCTGGGCATGTCTGAACAACTGGGTTATAAAACTGTATCAGGTTCCTGTATGTCCACTGGTTTTAGCCGAGCAGTACAAACACACAGCTCTAAATTTTTTGAAGAAGATGGATCCTTAAAGGAGGTACATAAGATAAATGAAATGTATGCTTCATTACAAGAGGAATTAAAGAGTATATGCAAAAAAGTGGAAGACAGTGAACAAGCAGTAGATAAA…
ERCC8	81057@G04	1161	ERCC8	618	excision repair cross-complementing rodent repair deficiency, complementation group 8	ATGCTGGGGTTTTTGTCCGCACGCCAAACGGGTTTGGAGGACCCTCTTCGCCTTCGGAGAGCAGAGTCAACACGGAGAGTTTTGGGACTGGAATTAAATAAAGACAGAGATGTTGAAAGAATCCACGGCGGTGGAATTAACACCCTTGACATTGAACCTGTTGAAGGGAGATACATGTTATCAGGTGGTTCAGATGGTGTGATTGTACTTTATGACCTTGAGAACTCCAGCAGACAATCTTATTACACATGTAAAGCAGTGTGTTCCATTGGCAGAGATCATCCTGATGTTCACAGATACAGTGTGGAGACTGTACAGTGGTATCCTCATGACACTGGCATGTTCACATCAAGCTCATTTGATAAAACTCTGAAAGTATGGGATACAAATACATTACAA…
ERCC5	81020@C06	2073	ERCC5	3561	excision repair cross-complementing rodent repair deficiency, complementation group 5	ATGGGGGTCCAGGGGCTCTGGAAGCTGCTGGAGTGCTCCGGGCGGCAGGTCAGCCCCGAAGCGCTGGAAGGGAAGATCCTGGCTGTTGATATTAGCATTTGGTTAAACCAAGCACTTAAAGGAGTCCGGGATCGCCACGGGAACTCAATAGAAAATCCTCATCTTCTCACTTTGTTTCATCGGCTCTGCAAACTCTTATTTTTTCGAATTCGTCCTATTTTTGTGTTTGATGGGGATGCTCCACTATTGAAGAAACAGACTTTGGTGAAGAGAAGGCAGAGAAAGGACTTAGCGTCCAGTGACTCCAGGAAAACGACAGAGAAGCTTCTGAAAACATTTTTGAAAAGACAAGCCATCAAAACTGCCTTCAGAAGCAAAAGAGATGAAGCACTACCCAGT…
ERCC4	2119@H11	2072	ERCC4	2751	excision repair cross-complementing rodent repair deficiency, complementation group 4	ATGGAGTCAGGGCAGCCGGCTCGACGGATTGCCATGGCGCCGCTGCTGGAGTACGAGCGACAGCTGGTGCTGGAACTGCTCGACACTGACGGGCTAGTAGTGTGCGCCCGCGGGCTCGGCGCGGACCGGCTCCTCTACCACTTTCTCCAGCTGCACTGCCACCCAGCCTGCCTGGTGCTGGTGCTCAACACGCAGCCGGCCGAGGAGGAGTATTTTATCAATCAGCTGAAGATAGAAGGAGTTGAACACCTCCCTCGCCGTGTAACAAATGAAATCACAAGCAACAGTCGCTATGAAGTTTACACACAAGGTGGTGTTATATTTGCGACAAGTAGGATACTTGTGGTTGACTTCTTGACTGATAGAATACCTTCAGATTTAATTACTGGCATCTTGGTG…
ERCC3	81017@B06	2071	ERCC3	2349	excision repair cross-complementing rodent repair deficiency, complementation group 3	ATGGGCAAAAGAGACCGAGCGGACCGCGACAAGAAGAAATCCAGGAAGCGGCACTATGAGGATGAAGAGGATGATGAAGAGGACGCCCCGGGGAACGACCCTCAGGAAGCGGTTCCCTCGGCGGCGGGGAAGCAGGTGGATGAGTCAGGCACCAAAGTGGATGAATATGGAGCCAAGGACTACAGGCTGCAAATGCCGCTGAAGGACGACCACACCTCCAGGCCCCTCTGGGTGGCTCCCGATGGCCATATCTTCTTGGAAGCCTTCTCTCCAGTTTACAAATATGCCCAAGACTTCTTGGTGGCTATTGCAGAGCCAGTGTGCCGACCAACCCATGTGCATGAGTACAAACTAACTGCCTACTCCTTGTATGCAGCTGTCAGCGTTGGGCTGCAAACC…
ERCC1	81069@F01	2067	ERCC1	972	excision repair cross-complementing rodent repair deficiency, complementation group 1 (includes overlapping antisense sequence)	ATGGACCCTGGGAAGGACAAAGAGGGGGTGCCCCAGCCCTCAGGGCCGCCAGCAAGGAAGAAATTTGTGATACCCCTCGACGAGGATGAGGTCCCTCCTGGAGTGGCCAAGCCCTTATTCCGATCTACACAGAGCCTTCCCACTGTGGACACCTCGGCCCAGGCGGCCCCTCAGACCTACGCCGAATATGCCATCTCACAGCCTCTGGAAGGGGCTGGGGCCACGTGCCCCACAGGGTCAGAGCCCCTGGCAGGAGAGACGCCCAACCAGGCCCTGAAACCCGGGGCAAAATCCAACAGCATCATTGTGAGCCCTCGGCAGAGGGGCAATCCCGTACTGAAGTTCGTGCGCAACGTGCCCTGGGAATTTGGCGACGTAATTCCCGACTATGTGCTGGGC…
ERCC1	81052@B03	2067	ERCC1	894	excision repair cross-complementing rodent repair deficiency, complementation group 1 (includes overlapping antisense sequence)	ATGGACCCTGGGAAGGACAAAGAGGGGGTGCCCCAGCCCTCAGGGCCGCCAGCAAGGAAGAAATTTGTGATACCCCTCGACGAGGATGAGGTCCCTCCTGGAGTGGCCAAGCCCTTATTCCGATCTACACAGAGCCTTCCCACTGTGGACACCTCGGCCCAGGCGGCCCCTCAGACCTACGCCGAATATGCCATCTCACAGCCTCTGGAAGGGGCTGGGGCCACGTGCCCCACAGGGTCAGAGCCCCTGGCAGGAGAGACGCCCAACCAGGCCCTGAAACCCGGGGCAAAATCCAACAGCATCATTGTGAGCCCTCGGCAGAGGGGCAATCCCGTACTGAAGTTCGTGCGCAACGTGCCCTGGGAATTTGGCGACGTAATTCCCGACTATGTGCTGGGC…
USP7	2121@H03	7874	USP7	3309	ubiquitin specific peptidase 7 (herpes virus-associated)	ATGAACCACCAGCAGCAGCAGCAGCAGCAGAAAGCGGGCGAGCAGCAGTTGAGCGAGCCCGAGGACATGGAGATGGAAGCGGGAGATACAGATGACCCACCAAGAATTACTCAGAACCCTGTGATCAATGGGAATGTGGCCCTGAGTGATGGACACAACACCGCGGAGGAGGACATGGAGGATGACACCAGTTGGCGCTCCGAGGCAACCTTTCAGTTCACTGTGGAGCGCTTCAGCAGACTGAGTGAGTCGGTCCTTAGCCCTCCGTGTTTTGTGCGAAATCTGCCATGGAAGATTATGGTGATGCCACGCTTTTATCCAGACAGACCACACCAAAAAAGCGTAGGATTCTTTCTCCAGTGCAATGCTGAATCTGATTCCACGTCATGGTCTTGCCAT…
DNA2	81110@C11	1763	DNA2	2064	DNA replication helicase 2 homolog (yeast)	ATGGAGCAGCTGAACGAACTGGAGCTGCTGATGGAGAAGAGTTTTTGGGAGGAGGCGGAGCTGCCGGCGGAGCTATTTCAGAAGAAAGTGGTAGCTTCCTTTCCAAGAACAGTTCTGAGCACAGGAATGGATAACCGGTACCTGGTGTTGGCAGTCAATACTGTACAGAACAAAGAGGGAAACTGTGAAAAGCGCCTGGTCATCACTGCTTCACAGTCACTAGAAAATAAAGAACTATGCATCCTTAGGAATGACTGGTGTTCTGTTCCAGTAGAGCCAGGAGATATCATTCATTTGGAGGGAGACTGCACATCTGACACTTGGATAATAGATAAAGATTTTGGATATTTGATTCTGTATCCAGACATGCTGATTTCTGGCACCAGCATAGCCAGTAGT…
DIS3L2	81137@E10	129563	DIS3L2	1839	DIS3 mitotic control homolog (S. cerevisiae)-like 2	ATGAACCTCCGGTCCCTGGGGACCCACAGAGGTGTGTCTGCTGTGGCTGGTCCACATGACATTGGTGCTTCGCCAGGTGACAAAAAGTCAAAGAACAGGTCCACACGAGGGAAGAAAAAGAGCATATTTGAAACTTACATGTCCAAGGAGGATGTTTCAGAAGGCTTGAAGAGAGGAACACTCATCCAGGGTGTATTGAGAATTAATCCAAAGAAGTTTCATGAAGCCTTCATTCCTTCCCCGGATGGTGATCGAGACATTTTTATTGATGGGGTTGTTGCTCGTAATAGAGCCTTAAATGGGGATCTGGTGGTCGTGAAACTGCTTCCCGAGGAGCATTGGAAGGTAGTTAAACCAGAGAGCAATGACAAAGAAACAGAAGCTGCGTATGAATCAGAT…
DDB2	81078@F05	1643	DDB2	1284	damage-specific DNA binding protein 2, 48kDa	ATGGCTCCCAAGAAACGCCCAGAAACCCAGAAGACCTCCGAGATTGTATTACGCCCCAGGAACAAGAGGAGCAGGAGTCCCCTGGAGCTGGAGCCCGAGGCCAAGAAGCTCTGTGCGAAGGGCTCCGGTCCTAGCAGAAGATGTGACTCAGACTGCCTCTGGGTGGGGCTGGCTGGCCCACAGATCCTGCCACCATGCCGCAGCATCGTCAGGACCCTCCACCAGCATAAGCTGGGCAGAGCTTCCTGGCCATCTGTCCAGCAGGGGCTCCAGCAGTCCTTTTTGCACACTCTGGATTCTTACCGGATATTACAAAAGGCTGCCCCCTTTGACAGGAGGGCTACATCCTTGGCGTGGCACCCAACTCACCCCAGCACCGTGGCTGTGGGTTCCAAAGGG…
DCLRE1C	81083@H11	64421	DCLRE1C	1305	DNA cross-link repair 1C	ATGAGTTCTTTCGAGGGGCAGATGGCCGAGTATCCAACTATCTCCATAGACCGCTTCGATAGGGAGAACCTGAGGGCCCGCGCCTACTTCCTGTCCCACTGCCACAAAGATCACATGAAAGGATTAAGAGCCCCTACCTTGAAAAGAAGGTTGGAGTGCAGCTTGAAGGTTTATCTATACTGTTCACCTGTGACTAAGGAGTTGTTGTTAACGAGCCCGAAATACAGATTTTGGAAGAAACGAATTATATCTATTGAAATCGAGACTCCTACCCAGATATCTTTAGTGGATGAAGCATCAGGAGAGAAGGAAGAGATTGTTGTGACTCTCTTACCAGCTGGTCACTGTCCGGGATCAGTTATGTTTTTATTTCAGGGCAATAATGGAACTGTCCTGTAC…
DCLRE1C	81137@D04	64421	DCLRE1C	1734	DNA cross-link repair 1C	ATGAAGCATCAGGAGAGGTTTTTATTTCAGGGCAATAATGGAACTGTCCTGTACACAGGAGACTTCAGATTGGCGCAAGGAGAAGCTGCTAGAATGGAGCTTCTGCACTCCGGGGGCAGAGTCAAAGACATCCAAAGTGTATATTTGGATACTACGTTCTGTGATCCAAGATTTTACCAAATTCCAAGTCGGGAGGAGTGTTTAAGTGGAGTCTTAGAGCTGGTCCGAAGCTGGATCACTCGGAGCCCGTACCATGTTGTGTGGCTGAACTGCAAAGCGGCTTATGGCTATGAATATCTGTTCACCAACCTTAGTGAAGAATTAGGAGTCCAGGTTCATGTGAATAAGCTAGACATGTTTAGGAACATGCCTGAGATCCTTCATCATCTCACAACAGAC…
DCLRE1B	81104@D04	64858	DCLRE1B	1599	DNA cross-link repair 1B	ATGAATGGGGTCCTGATCCCCCATACGCCCATCGCAGTGGACTTCTGGAGCCTGCGCCGGGCTGGCACCGCACGTCTCTTCTTCTTGTCTCACATGCACTCGGACCACACCGTGGGCCTGTCTAGCACCTGGGCCCGGCCCCTCTACTGCTCCCCAATTACAGCCCACCTCTTGCATCGTCACCTACAGGTATCTAAGCAATGGATCCAAGCCCTGGAGGTTGGTGAGAGCCATGTATTACCCCTAGATGAAATTGGACAAGAGACCATGACCGTAACCCTCCTCGATGCCAATCACTGTCCTGGTTCTGTCATGTTTCTCTTTGAAGGATATTTTGGAACCATCCTCTACACAGGTGATTTTCGATACACACCATCCATGCTAAAGGAGCCAGCCCTG…
DCLRE1A	81131@F07	9937	DCLRE1A	3123	DNA cross-link repair 1A	ATGTTAGAAGACATTTCCGAAGAAGACATTTGGGAATACAAATCTAAAAGAAAACCAAAACGAGTTGATCCAAATAATGGCTCTAAAAATATTCTAAAATCTGTTGAAAAAGCAACAGATGGAAAATACCAGTCAAAACGGAGTAGAAACAGAAAAAGAGCCGCAGAAGCTAAAGAGGTGAAGGACCATGAAGTGCCCCTTGGAAATGCAGGTTGTCAGACTTCTGTTGCTTCTAGTCAGAATTCAAGTTGTGGAGATGGTATTCAGCAGACCCAAGACAAGGAAACTACTCCAGGAAAACTCTGTAGAACTCAAAAAAGCCAACACGTGTCCCCAAAGATACGTCCAGTTTATGATGGATACTGTCCAAATTGCCAGATGCCTTTTTCCTCATTGATA…
CNOT8	81051@A04	9337	CNOT8	879	CCR4-NOT transcription complex, subunit 8	ATGCCTGCAGCACTTGTGGAGAATAGCCAGGTTATCTGTGAAGTGTGGGCCAGTAATCTAGAAGAAGAGATGAGGAAGATCCGAGAAATCGTGCTCAGTTACAGTTATATTGCCATGGACACAGAATTTCCAGGTGTTGTGGTGCGACCAATTGGTGAATTTCGTAGTTCCATAGATTACCAATATCAGCTTCTGCGGTGCAATGTTGACCTTTTAAAAATTATCCAGCTGGGCCTTACATTCACAAATGAGAAGGGAGAGTATCCTTCTGGAATCAATACTTGGCAGTTCAATTTCAAATTTAACCTTACAGAGGACATGTACTCCCAGGATTCCATAGATCTCCTTGCTAACTCAGGACTACAGTTTCAGAAGCATGAAGAGGAAGGGATTGACACA…
CNOT7	81059@A03	29883	CNOT7	858	CCR4-NOT transcription complex, subunit 7	ATGCCAGCGGCAACTGTAGATCATAGCCAAAGAATTTGTGAAGTTTGGGCTTGCAACTTGGATGAAGAGATGAAGAAAATTCGTCAAGTTATCCGAAAATATAATTACGTTGCTATGGACACCGAGTTTCCAGGTGTGGTTGCAAGACCCATTGGAGAATTCAGGAGCAATGCTGACTATCAATACCAACTATTGCGGTGTAATGTAGACTTGTTAAAGATAATTCAGCTAGGACTGACATTTATGAATGAGCAAGGAGAATACCCTCCAGGAACTTCAACTTGGCAGTTTAATTTTAAATTTAATTTGACGGAGGACATGTATGCCCAGGACTCTATAGAGCTACTAACAACATCTGGTATCCAGTTTAAAAAACATGAGGAGGAAGGAATTGAAACC…
CNOT7	81040@F10	29883	CNOT7	741	CCR4-NOT transcription complex, subunit 7	ATGCCAGCGGCAACTGTAGATCATAGCCAAAGAATTTGTGAAGTTTGGGCTTGCAACTTGGATGAAGAGATGAAGAAAATTCGTCAAGTTATCCGAAAATATAATTACGTTGCTATGGACACCGAGTTTCCAGGTGTGGTTGCAAGACCCATTGGAGAATTCAGGAGCAATGCTGACTATCAATACCAACTATTGCGGTGTAATGTAGACTTGTTAAAGATAATTCAGCTAGGACTGACATTTATGAATGAGCAAGGAGAATACCCTCCAGGAACTTCAACTTGGCAGTTTAATTTTAAATTTAATTTGACGGAGGACATGTATGCCCAGGACTCTATAGAGCTACTAACAACATCTGGTATCCAGTTTAAAAAACATGAGGAGGAAGGAATTGAAACC…
CNOT6	81090@C09	57472	CNOT6	279	CCR4-NOT transcription complex, subunit 6	ATGTGCATCATGACAATTTCCAGTGAAGGTGAGCTGGAGCTGGTTGGACTAATGAGACTGAGGAAGCAGCTTTTCCTACGATCTGCATTATGTAATCACAGGTCCAGAGAGCTTTATGGAAGCGGGAGAGGAGGAGCACTTACTCATGTTGTATTTGTTAATGGAGGATGTCATCTTTTCATAGATGCTGGAACTAGAGTGCACTTGTTAGATGCTAAAGGTTTGAGCTTTACACAAAATGTCTTCATCTGTATTTGTTATTGTCTACAATATATTTGA
CHEK1	2104@D10	1111	CHEK1	1428	checkpoint kinase 1	ATGGCAGTGCCCTTTGTGGAAGACTGGGACTTGGTGCAAACCCTGGGAGAAGGTGCCTATGGAGAAGTTCAACTTGCTGTGAATAGAGTAACTGAAGAAGCAGTCGCAGTGAAGATTGTAGATATGAAGCGTGCCGTAGACTGTCCAGAAAATATTAAGAAAGAGATCTGTATCAATAAAATGCTAAATCATGAAAATGTAGTAAAATTCTATGGTCACAGGAGAGAAGGCAATATCCAATATTTATTTCTGGAGTACTGTAGTGGAGGAGAGCTTTTTGACAGAATAGAGCCAGACATAGGCATGCCTGAACCAGATGCTCAGAGATTCTTCCATCAACTCATGGCAGGGGTGGTTTATCTGCATGGTATTGGAATAACTCACAGGGATATTAAACCA…
CDK7	81064@F10	1022	CDK7	1041	cyclin-dependent kinase 7	ATGGCTCTGGACGTGAAGTCTCGGGCAAAGCGTTATGAGAAGCTGGACTTCCTTGGGGAGGGACAGTTTGCCACCGTTTACAAGGCCAGAGATAAGAACACCAACCAAATTGTCGCCATTAAGAAAATCAAACTTGGACATAGATCAGAAGCTAAAGATGGTATAAATAGAACCGCCTTAAGAGAGATAAAATTATTACAGGAGCTAAGTCATCCAAATATAATTGGTCTCCTTGATGCTTTTGGACATAAATCTAATATTAGCCTTGTCTTTGATTTTATGGAAACTGATCTAGAGGTTATAATAAAGGATAATAGTCTTGTGCTGACACCATCACACATCAAAGCCTACATGTTGATGACTCTTCAAGGATTAGAATATTTACATCAACATTGGATC…
CDC7	81105@G09	8317	CDC7	1725	cell division cycle 7 homolog (S. cerevisiae)	ATGGAGGCGTCTTTGGGGATTCAGATGGATGAGCCAATGGCTTTTTCTCCCCAGCGTGACCGGTTTCAGGCTGAAGGCTCTTTAAAAAAAAACGAGCAGAATTTTAAACTTGCAGGTGTTAAAAAAGATATTGAGAAGCTTTATGAAGCTGTACCACAGCTTAGTAATGTGTTTAAGATTGAGGACAAAATTGGAGAAGGCACTTTCAGCTCTGTTTATTTGGCCACAGCACAGTTACAAGTAGGACCTGAAGAGAAAATTGCTCTAAAACACTTGATTCCAACAAGTCATCCTATAAGAATTGCAGCTGAACTTCAGTGCCTAACAGTGGCTGGGGGGCAAGATAATGTCATGGGAGTTAAATACTGCTTTAGGAAGAATGATCATGTAGTTATTGCT…
CDC45	81099@F05	8318	CDC45	1701	cell division cycle 45 homolog (S. cerevisiae)	ATGTTCGTGTCCGATTTCCGCAAAGAGTTCTACGAGGTGGTCCAGAGCCAGAGGGTCCTTCTCTTCGTGGCCTCGGACGTGGATGCTCTGTGTGCGTGCAAGATCCTTCAGGCCTTGTTCCAGTGTGACCACGTGCAATATACGCTGGTTCCAGTTTCTGGGTGGCAAGAACTTGAAACTGCATTTCTTGAGCATAAAGAACAGTTTCATTATTTTATTCTCATAAACTGTGGAGCTAATGTAGACCTATTGGATATTCTTCAACCTGATGAAGACACTATATTCTTTGTGTGTGACACCCATAGGCCAGTCAATGTCGTCAATGTATACAACGATACCCAGATCAAATTACTCATTAAACAAGATGATGACCTTGAAGTTCCCGCCTATGAAGACATC…
CCNO	2119@F05	10309	CCNO	1053	cyclin O	ATGGTGACCCCCTGTCCCACCAGCCCCTCGAGCCCCGCCGCCCGAGCGGGGAGGCGGGACAACGACCAGAACCTTCGCGCCCCGGTGAAGAAGAGCAGGCGTCCGCGCCTCCGGAGGAAGCAGCCGCTGCATCCCCTGAACCCGTGCCCGCTCCCGGGAGACTCCGGCATTTGCGACCTGTTCGAGTCCCCCAGCTCCGGCTCAGACGGCGCAGAGAGCCCCTCTGCGGCGCGGGGTGGTAGCCCCCTGCCCGGCCCGGCCCAGCCCGTGGCGCAGCTAGATCTACAGACCTTCCGCGACTACGGCCAGAGCTGCTACGCCTTCCGCAAGGCGCAGGAGAGCCACTTCCACCCGCGGGAGGCGCTGGCACGGCAGCCACAAGTGACGGCGGAATCCCGC…
CCNH	81061@D01	902	CCNH	972	cyclin H	ATGTACCACAACAGTAGTCAGAAGCGGCACTGGACCTTCTCCAGCGAGGAGCAGCTGGCAAGACTGCGGGCTGACGCCAACCGCAAATTCAGATGCAAAGCCGTGGCCAACGGGAAGGTTCTTCCGAATGATCCAGTCTTTCTTGAGCCTCATGAAGAAATGACACTCTGCAAATACTATGAGAAAAGGTTATTGGAATTCTGTTCGGTGTTTAAGCCAGCAATGCCAAGATCTGTTGTGGGTACGGCTTGTATGTATTTCAAACGTTTTTATCTTAATAACTCAGTAATGGAATATCACCCCAGGATAATAATGCTCACTTGTGCATTTTTGGCCTGCAAAGTAGATGAATTCAATGTATCTAGTCCTCAGTTTGTTGGAAACCTCCGGGAGAGTCCT…
CCNH	81061@D06	902	CCNH	972	cyclin H	ATGTACCACAACAGTAGTCAGAAGCGGCACTGGACCTTCTCCAGCGAGGAGCAGCTGGCAAGACTGCGGGCTGACGCCAACCGCAAATTCAGATGCAAAGCCGTGGCCAACGGGAAGGTTCTTCCGAATGATCCAGTCTTTCTTGAGCCTCATGAAGAAATGACACTCTGCAAATACTATGAGAAAAGGTTATTGGAATTCTGTTCGGTGTTTAAGCCAGCAATGCCAAGATCTGTTGTGGGTACGGCTTGTATGTATTTCAAACGTTTTTATCTTAATAACTCAGTAATGGAATATCACCCCAGGATAATAATGCTCACTTGTGCATTTTTGGCCTGCAAAGTAGATGAATTCAATGTATCTAGTCCTCAGTTTGTTGGAAACCTCCGGGAGAGTCCT…
CCNH	81061@E05	902	CCNH	972	cyclin H	ATGTACCACAACAGTAGTCAGAAGCGGCACTGGACCTTCTCCAGCGAGGAGCAGCTGGCAAGACTGCGGGCTGACGCCAACCGCAAATTCAGATGCAAAGCCGTGGCCAACGGGAAGGTTCTTCCGAATGATCCAGTCTTTCTTGAGCCTCATGAAGAAATGACACTCTGCAAATACTATGAGAAAAGGTTATTGGAATTCTGTTCGGTGTTTAAGCCAGCAATGCCAAGATCTGTTGTGGGTACGGCTTGTATGTATTTCAAACGTTTTTATCTTAATAACTCAGTAATGGAATATCACCCCAGGATAATAATGCTCACTTGTGCATTTTTGGCCTGCAAAGTAGATGAATTCAATGTATCTAGTCCTCAGTTTGTTGGAAACCTCCGGGAGAGTCCT…
CCDC155	81136@A12	147872	CCDC155	1689	coiled-coil domain containing 155	ATGGACCTGCCTGAGGGCCCGGTGGGTGGCCCCACTGCGGAAATGTACCTCCGGGAGCGGCCTGAGGAGGCAAGGCTGGGAATGCCGGTCAGCTTGGAGGAGCAAATACTCAACTCCACGTTCGAAGCTTGTGACCCTCAGAGGACAGGCACTGTGGCTGTGGCCCAGGTGCTGGCCTACCTGGAGGCTGTGACAGGCCAGGGCCCCCAGGATGCACGCCTCCAAACATTGGCCAACAGCCTGGACCCCAATGGGGAGGGCCCTAAGGCCACTGTGGACTTGGACACTTTCCTGGTTGTCATGCGTGACTGGATTGCTGCCTGTCAACTACATGGGGGATTAGAGCTGGAAGAGGAGACCGCCTTCCAGGGAGCCCTGACCTCCCAGCAACTGCCATCT…
C20orf72	81064@E08	92667	C20orf72	1035	chromosome 20 open reading frame 72	ATGAAGATGAAGTTATTTCAGACCATTTGCAGGCAGCTCAGGAGTTCAAAGTTTTCTGTGGAATCAGCTGCCCTTGTGGCTTTCTCTACTTCCTCTTACTCATGTGGCCGGAAGAAAAAAGTGAACCCATATGAAGAAGTGGACCAAGAAAAATACTCTAATTTAGTTCAGTCTGTCTTGTCATCCAGAGGCGTCGCCCAGACCCCGGGATCGGTGGAGGAAGATGCTTTGCTCTGTGGACCCGTGAGCAAGCATAAGCTGCCAAACCAAGGTGAGGACAGACGAGTGCCACAAAACTGGTTTCCTATCTTCAATCCAGAGAGAAGTGATAAACCAAATGCAAGTGATCCTTCAGTTCCTTTGAAAATCCCCTTGCAAAGGAATGTGATACCAAGTGTG…
C16orf73	81091@A03	254528	C16orf73	597	chromosome 16 open reading frame 73	ATGACAGCAACTGTAATCTCAAAAACCATTATTACAACTAATCCAGATATACCAGAAGCTAACATTCTGCTGAATTTTATACGAGAAAATAAAGAAACAAATGTTCTGGATGATGAAATTGACAGTTATTTCAAAGAATCCATAAATTTAAGTACAATAGTTGATGTCTACACAGTTGAACAATTAAAGGGAAAAGCTTTGAAGAATGAAGGAAAAGCTGATCCTTCCTATGGCATCCTTTATGCCTACATTTCCACACTCAACATTGATGATGAAACTACAAAAGTAGTTCGAAATAGATGTTCCAGCTGTGGTTATATTGTAAATGAAGCATCTAACATGTGCACAACTTGCAACAAAAACTCCTTGGACTTTAAATCTGTCTTTCTCAGTTTCCAT…
C16orf57	81047@F04	79650	C16orf57	798	chromosome 16 open reading frame 57	ATGAGCGCGGCGCCCCTGGTGGGCTACAGCAGCAGCGGCTCCGAGGATGAGTCCGAGGACGGGATGCGGACCAGGCCGGGGGATGGGAGCCACCGTCGTGGCCAGAGCCCCCTTCCCAGGCAGAGATTTCCAGTACCTGACAGTGTGCTGAACATGTTCCCGGGCACCGAGGAGGGGCCTGAAGATGACAGCACAAAACACGGGGGACGGGTGCGCACCTTCCCCCACGAGCGAGGCAACTGGGCCACCCACGTCTATGTACCATATGAAGCCAAGGAGGAGTTCCTGGATCTGCTTGATGTGTTGCTGCCCCATGCCCAGACATATGTCCCCCGGCTGGTAAGGATGAAGGTGTTCCACCTCAGCCTGTCCCAGAGTGTGGTTCTGCGCCACCACTGG…
BRCC3	81134@F09	79184	BRCC3	951	BRCA1/BRCA2-containing complex, subunit 3	ATGGCGGTGCAGGTGGTGCAGGCGGTGCAGGCGGTTCATCTCGAGTCTGACGCTTTCCTCGTTTGTCTCAACCACGCTCTGAGCACAGAGAAGGAGGAAGTAATGGGGCTGTGCATAGGGGAGTTGAACGATGATACAAGGAGTGACTCCAAATTTGCATATACTGGAACTGAAATGCGCACAGTTGCTGAAAAGGTTGATGCCGTCAGAATTGTTCACATTCATTCTGTCATCATCTTACGACGTTCTGATAAGAGGAAGGACCGAGTAGAAATTTCTCCAGAGCAGCTGTCTGCAGCTTCAACAGAGGCAGAGAGGTTGGCTGAACTGACAGGCCGCCCCATGAGAGTTGTGGGCTGGTATCATTCCCATCCTCATATAACTGTTTGGCCTTCACAT…
BRCA2	2122@H04	675	BRCA2	10257	breast cancer 2, early onset	ATGCCTATTGGATCCAAAGAGAGGCCAACATTTTTTGAAATTTTTAAGACACGCTGCAACAAAGCAGATTTAGGACCAATAAGTCTTAATTGGTTTGAAGAACTTTCTTCAGAAGCTCCACCCTATAATTCTGAACCTGCAGAAGAATCTGAACATAAAAACAACAATTACGAACCAAACCTATTTAAAACTCCACAAAGGAAACCATCTTATAATCAGCTGGCTTCAACTCCAATAATATTCAAAGAGCAAGGGCTGACTCTGCCGCTGTACCAATCTCCTGTAAAAGAATTAGATAAATTCAAATTAGACTTAGGAAGGAATGTTCCCAATAGTAGACATAAAAGTCTTCGCACAGTGAAAACTAAAATGGATCAAGCAGATGATGTTTCCTGTCCA…
BRCA1	81021@G02	672	BRCA1	4065	breast cancer 1, early onset	ATGATAAATCAGGGAACTAACCAAACGGAGCAGAATGGTCAAGTGATGAATATTACTAATAGTGGTCATGAGAATAAAACAAAAGGTGATTCTATTCAGAATGAGAAAAATCCTAACCCAATAGAATCACTCGAAAAAGAATCTGCTTTCAAAACGAAAGCTGAACCTATAAGCAGCAGTATAAGCAATATGGAACTCGAATTAAATATCCACAATTCAAAAGCACCTAAAAAGAATAGGCTGAGGAGGAAGTCTTCTACCAGGCATATTCATGCGCTTGAACTAGTAGTCAGTAGAAATCTAAGCCCACCTAATTGTACTGAATTGCAAATTGATAGTTGTTCTAGCAGTGAAGAGATAAAGAAAAAAAAGTACAACCAAATGCCAGTCAGGCACAGC…
BRCA1	81111@F08	672	BRCA1	2100	breast cancer 1, early onset	ATGGATTTATCTGCTCTTCGCGTTGAAGAAGTACAAAATGTCATTAATGCTATGCAGAAAATCTTAGAGTGTCCCATCTGTCTGGAGTTGATCAAGGAACCTGTCTCCACAAAGTGTGACCACATATTTTGCAAATTTTGCATGCTGAAACTTCTCAACCAGAAGAAAGGGCCTTCACAGTGTCCTTTATGTAAGAATGATATAACCAAAAGGAGCCTACAAGAAAGTACGAGATTTAGTCAACTTGTTGAAGAGCTATTGAAAATCATTTGTGCTTTTCAGCTTGACACAGGTTTGGAGTATGCAAACAGCTATAATTTTGCAAAAAAGGAAAATAACTCTCCTGAACATCTAAAAGATGAAGTTTCTATCATCCAAAGTATGGGCTACAGAAACCGT…
ATRIP	81111@A05	84126	ATRIP	2097	ATR interacting protein	ATGTCAAAAAATCCTTCAGGGAAAAACAGAGAAACTGTTCCAATTAAAGATAATTTCGAATTAGAGGTACTTCAGGCACAATACAAAGAACTTAAAGAAAAGATGAAAGTAATGGAAGAAGAAGTTCTCATTAAGAATGGAGAAATTAAAATTTTGCGAGACTCACTACATCAGACGGAATCCGTTCTAGAGGAACAGAGAAGATCACATTTTCTTCTTGAGCAAGAGAAAACCCAAGCACTCAGTGACAAGGAAAAGGAATTCTCCAAAAAGCTCCAATCATTGCAGTCTGAACTCCAGTTTAAAGATGCAGAGATGAATGAATTAAGGACAAAGCTCCAGACCAGTGAACGAGCAAATAAACTGGCTGCTCCCTCTGTTTCCCATGTCAGTCCTAGG…
ATR	2123@A06	545	ATR	7935	ataxia telangiectasia and Rad3 related	ATGGGGGAACATGGCCTGGAGCTGGCTTCCATGATCCCCGCCCTGCGGGAGCTGGGCAGTGCCACACCAGAGGAATATAATACAGTTGTACAGAAGCCAAGACAAATTCTGTGTCAATTCATTGACCGGATACTTACAGATGTAAATGTTGTTGCTGTAGAACTTGTAAAGAAAACTGACTCTCAGCCAACCTCCGTGATGTTGCTTGATTTCATCCAGCATATCATGAAATCCTCCCCACTTATGTTTGTAAATGTGAGTGGAAGCCATGAGGCCAAAGGCAGTTGTATTGAATTCAGTAATTGGATCATAACGAGACTTCTGCGGATTGCAGCAACTCCCTCCTGTCATTTGTTACACAAGAAAATCTGTGAAGTCATCTGTTCATTATTATTTCTT…
ATM	81079@A10	472	ATM	339	ataxia telangiectasia mutated	ATGAGTCTAGTACTTAATGATCTGCTTATCTGCTGCCGTCAACTAGAACATGATAGAGCTACAGAACGAAAGAAAGAAGTTGAGAAATTTAAGCGCCTGATTCGAGATCCTGAAACAATTAAACATCTAGATCGGCATTCAGATTCCAAACAAGGAAAATATTTGAATTGGGATGCTGTTTTTAGATTTTTACAGAAATATATTCAGAAAGAAACAGAATGTCTGAGAATAGCAAAACCAAATGTATCAGCCTCAACACAAGCCTCCAGGCAGAAAAAGATGCAGGAAATCAGTAGTTTGGTCAAATACTTCATCAAATGTGCAAACAGAAGTAAGTGA
ATM	81102@G07	472	ATM	396	ataxia telangiectasia mutated	ATGACGTTACATGAGCCAGCAAATTCTAGTGCCAGTCAGAGCACTGACCTCTGTGACTTTTCAGGGGATTTGGATCCTGCTCCTAATCCACCTCATTTTCCATCGCATGTGATTAAAGCAACATTTGCCTATATCAGCAATTGTCATAAAACCAAGTTAAAAAGCATTTTAGAAATTCTTTCCAAAAGCCCTGATTCCTATCAGAAAATTCTTCTTGCCATATGTGAGCAAGCAGCTGAAACAAATAATGTTTATAAGAAGCACAGAATTCTTAAAATATATCACCTGTTTGTTAGTTTATTACTGAAAGATATAAAAAGTGGCTTAGGAGGAGCTTGGGCCTTTGTTCTTCGAGACGTTATTTATACTTTGATTCACTATATCAACCAAAGGTAA
APTX	81025@D07	54840	APTX	507	aprataxin	ATGCAGGACCCCAAAATGCAGGTTTACAAAGATGAGCAGGTGGTGGTGATAAAGGATAAATACCCAAAGGCCCGTTACCATTGGCTGGTCTTACCGTGGACCTCCATTTCCAGTCTGAAGGCTGTGGCCAGGGAACACCTTGAACTCCTTAAGCATATGCACACTGTGGGGGAAAAGGTGATTGTAGATTTTGCTGGGTCCAGCAAACTCCGCTTCCGATTGGGCTACCACGCCATTCCGAGTATGAGCCATGTACATCTTCATGTGATCAGCCAGGATTTTGATTCTCCTTGCCTTAAAAACAAAAAACATTGGAATTCTTTCAATACAGAATACTTCCTAGAATCACAAGCTGTGATCGAGATGGTACAAGAGGCTGGTAGAGTAACTGTCCGAGAT…
APLF	81095@E06	200558	APLF	1536	aprataxin and PNKP like factor	ATGTCCGGGGGCTTCGAGCTGCAGCCGCGGGACGGCGGTCCCCGGGTGGCCCTGGCGCCCGGGGAGACGGTGATCGGCCGCGGGCCGCTGCTGGGAATAACAGACAAGAGAGTATCCAGAAGACATGCCATTCTTGAGGTGGCAGGTGGTCAGCTGCGAATCAAACCGATACACACAAATCCATGTTTTTACCAGTCTTCAGAGAAGAGTCAGCTCTTACCATTGAAGCCAAATCTATGGTGCTATTTGAATCCTGGAGACAGCTTTTCTTTGTTAGTTGACAAATACATTTTCCGCATTCTCTCTATACCCTCTGAAGTGGAAATGCAATGTACCTTAAGAAACAGTCAAGTGCTTGATGAAGATAATATATTGAATGAAACACCAAAATCCCCCGTG…
APEX2	81096@D08	27301	APEX2	1557	APEX nuclease (apurinic/apyrimidinic endonuclease) 2	ATGTTGCGCGTGGTGAGCTGGAACATCAATGGGATTCGGAGACCCCTGCAAGGGGTGGCAAATCAGGAACCCAGCAACTGTGCCGCCGTGGCCGTGGGGCGCATTTTGGACGAGCTGGATGCGGATATCGTCTGTCTCCAGGAAACCAAAGTGACCAGGGATGCACTGACAGAGCCCCTGGCTATCGTTGAGGGTTATAACTCCTATTTCAGCTTCAGCCGCAACCGTAGCGGCTATTCTGGTGTAGCCACCTTCTGTAAGGACAATGCTACCCCAGTGGCTGCTGAAGAAGGCCTGAGTGGCCTGTTTGCCACCCAGAATGGGGATGTTGGTTGCTATGGAAACATGGATGAGTTTACCCAAGAGGAACTCCGGGCTCTGGATAGTGAGGGCAGGGCC…
APEX1	81060@C01	328	APEX1	957	APEX nuclease (multifunctional DNA repair enzyme) 1	ATGCCGAAGCGTGGGAAAAAGGGAGCGGTGGCGGAAGACGGGGATGAGCTCAGGACAGAGCCAGAGGCCAAGAAGAGTAAGACGGCCGCAAAGAAAAATGACAAAGAGGCAGCAGGAGAGGGCCCAGCCCTGTATGAGGACCCCCCAGATCAGAAAACCTCACCCAGTGGCAAACCTGCCACACTCAAGATCTGCTCTTGGAATGTGGATGGGCTTCGAGCCTGGATTAAGAAGAAAGGATTAGATTGGGTAAAGGAAGAAGCCCCAGATATACTGTGCCTTCAAGAGACCAAATGTTCAGAGAACAAACTACCAGCTGAACTTCAGGAGCTGCCTGGACTCTCTCATCAATACTGGTCAGCTCCTTCGGACAAGGAAGGGTACAGTGGCGTGGGCCTG…
APEX1	81060@H10	328	APEX1	957	APEX nuclease (multifunctional DNA repair enzyme) 1	ATGCCGAAGCGTGGGAAAAAGGGAGCGGTGGCGGAAGACGGGGATGAGCTCAGGACAGAGCCAGAGGCCAAGAAGAGTAAGACGGCCGCAAAGAAAAATGACAAAGAGGCAGCAGGAGAGGGCCCAGCCCTGTATGAGGACCCCCCAGATCAGAAAACCTCACCCAGTGGCAAACCTGCCACACTCAAGATCTGCTCTTGGAATGTGGATGGGCTTCGAGCCTGGATTAAGAAGAAAGGATTAGATTGGGTAAAGGAAGAAGCCCCAGATATACTGTGCCTTCAAGAGACCAAATGTTCAGAGAACAAACTACCAGCTGAACTTCAGGAGCTGCCTGGACTCTCTCATCAATACTGGTCAGCTCCTTCGGACAAGGAAGGGTACAGTGGCGTGGGCCTG…
AP5Z1	81079@G03	9907	AP5Z1	1341	adaptor-related protein complex 5, zeta 1 subunit	ATGGCCAAGGTCGTGGTCCTCAGCCCGGGCACCCTCCAGGAGGACCAGGCCACCCTGCTCAGCAAGCGGCTGGTCGACTGGCTGCGCTACGCCAGCCTCCAGCAAGGGCTCCCACACTCCGGCGGCTTCTTCTCCACGCCCAGGGCCCGGCAGCCGGGCCCCGTCACCGAGGTGGACGGGGCGGTAGCCACAGACTTCTTCACGGTGCTCTCCAGCGGCCACCGCTTCACAGACGACCAGTGGCTGAACGTGCAGGCCTTCTCTATGCTGCGGGCGTGGCTGCTGCACAGCGGCCCCGAGGGCCCGGGCACCCTGGACACAGATGACAGGTCAGAGCAGGAGGGCTCCACTCTGTCGGTGATCTCCGCCACCTCCTCTGCCGGCCGCCTGCTGCCGCCC…
AP5S1	81121@D08	55317	AP5S1	603	adaptor-related protein complex 5, sigma 1 subunit	ATGGTCCACGCCTTCCTCATTCACACCTTGAGGGCCCCGAATACTGAGGACACGGGCCTTTGCCGAGTGCTGTACTCCTGCGTCTTCGGTGCTGAGAAGTCACCTGATGACCCACGGCCGCATGGTGCCGAGAGGGACAGGCTTCTCCGGAAGGAACAGATTTTAGCTGTGGCCAGGCAGGTAGAGTCAATGTGTCGGCTGCAGCAGCAGGCATCTGGCCGGCCCCCCATGGACCTGCAGCCGCAATCCTCAGATGAGCAAGTGCCGCTGCACGAGGCCCCACGTGGGGCTTTCCGCCTGGCAGCAGAGAACCCTTTCCAGGAGCCACGGACGGTGGTGTGGCTGGGCGTGCTCTCGTTAGGCTTTGCCCTGGTGCTGGATGCCCATGAGAACCTGCTA…
ANTXR1	81063@H02	84168	ANTXR1	1002	anthrax toxin receptor 1	ATGGCCACGGCGGAGCGGAGAGCCCTCGGCATCGGCTTCCAGTGGCTCTCTTTGGCCACTCTGGTGCTCATCTGCGCCGGGCAAGGGGGACGCAGGGAGGATGGGGGTCCAGCCTGCTACGGCGGATTTGACCTGTACTTCATTTTGGACAAATCAGGAAGTGTGCTGCACCACTGGAATGAAATCTATTACTTTGTGGAACAGTTGGCTCACAAATTCATCAGCCCACAGTTGAGAATGTCCTTTATTGTTTTCTCCACCCGAGGAACAACCTTAATGAAACTGACAGAAGACAGAGAACAAATCCGTCAAGGCCTAGAAGAACTCCAGAAAGTTCTGCCAGGAGGAGACACTTACATGCATGAAGGATTTGAAAGGGCCAGTGAGCAGATTTATTAT…
AEN	81062@C09	64782	AEN	984	apoptosis enhancing nuclease	ATGGTACCCCGGGAGGCCCCTGAGTCTGCTCAGTGCCTGTGCCCTTCCCTCACCATCCCAAATGCCAAGGATGTGCTTCGGAAGAGGCACAAGAGAAGGAGCCGACAGCACCAGCGGTTCATGGCCCGGAAGGCCTTGCTGCAGGAGCAGGGGCTGCTGAGCATGCCTCCAGAGCCAGGGTCCTCCCCACTGCCCACCCCTTTCGGGGCAGCGACAGCAACTGAAGCTGCCAGCAGTGGGAAGCAGTGTCTGAGGGCTGGATCTGGCAGTGCCCCATGCAGCAGAAGGCCTGCTCCCGGGAAAGCCTCAGGGCCCTTGCCCAGCAAGTGTGTGGCTATCGACTGTGAGATGGTGGGCACGGGACCCCGAGGGCGGGTAAGCGAGCTGGCCCGCTGTTCC…
AEN	81030@F01	64782	AEN	630	apoptosis enhancing nuclease	ATGGTGGGCACGGGACCCCGAGGGCGGGTAAGCGAGCTGGCCCGCTGTTCCATTGTGAGCTACCATGGCGATGTCCTCTATGACAAGTACATCAGGCCTGAGATGCCCATCGCTGACTACCGTACCCGCTGGAGTGGCATCACTCGGCAGCACATGCGCAAGGCTGTCCCCTTCCAGGTGGCCCAGAAAGAGATCCTTAAGCTCCTGAAGGGCAAGGTGGTGGTGGGGCACGCGCTGCACAACGACTTCCAGGCGCTCAAGTATGTCCACCCTCGGAGCCAGACCCGGGATACCACCTATGTCCCAAACTTCCTCAGCGAGCCCGGCCTCCACACCCGGGCCCGGGTCTCTCTAAAGGACCTGGCCCTGCAGCTGCTGCACAAGAAGATCCAGGTGGGC…
